# Supplementary material for: The morphology and internal structure of dogwood (Cornus L.) endocarps in the taxonomy and phylogeny of the genus
Source: PeerJ. 2021 Oct 28;9:e12170. doi: 10.7717/peerj.12170 (PMC8557701; doi:10.7717/peerj.12170)
Supplement: Supplemental Information 5 [file peerj-09-12170-s005.xls]

## Sheet: Arkusz2
									VBP			SSH				ASH				ACP		SSF		BSH				DF		FV
								Klad	0	1	2	0	1	2	3	0	1	2	3	0	1	0	1	0	1	2	3	0	1	0	1
Maksimum z FV%								BW	410	1985	417	1107	756	949	0	737	85	127	1863	2195	617	2250	562	377	93	1973	369	1942	870	537	2275
nowa numeracja gat	Suma							CC	103	296	0	399	0	0	0	0	0	0	399	169	230	399	0	22	10	302	65	399	0	284	115
1	83.3333							BB	317	99	0	226	0	0	190	0	0	37	379	416	0	252	164	0	0	235	181	47	369	414	2
2	100							DW	0	219	0	125	0	94	0	49	129	20	21	219	0	219	0	4	0	202	13	212	7	219	0
3	100								VBP			SSH				ASH				ACP		SSF		BSH				DF		FV
4	100								0	1	2	0	1	2	3	0	1	2	3	0	1	0	1	0	1	2	3	0	1	0	1
5	66.6667							Kra	0	1985	417	1019	483	900	0	737	85	127	1453	2194	208	1929	473	376	93	1649	284	1546	856	536	1866
6	100							Mes	410	0	0	88	273	49	0	0	0	0	410	1	409	321	89	1	0	324	85	396	14	1	409
7	100							Cor	103	296	0	399	0	0	0	0	0	0	399	169	230	399	0	22	10	302	65	399	0	284	115
8	87.5							Cyn	127	99	0	226	0	0	0	0	0	19	207	226	0	226	0	0	0	58	168	21	205	225	1
9	75							Syn	190	0	0	0	0	0	190	0	0	18	172	190	0	26	164	0	0	177	13	26	164	189	1
10	83.3333							Arc	0	219	0	125	0	94	0	49	129	20	21	219	0	219	0	4	0	202	13	212	7	219	0
11	100								VBP			SSH				ASH				ACP		SSF		BSH				DF		FV
12	75								0	1	2	0	1	2	3	0	1	2	3	0	1	0	1	0	1	2	3	0	1	0	1
13	100							1	0	273	2	1	5	269	0	192	20	0	63	275	0	275	0	56	54	152	13	127	148	64	211
14	100							2	190	0	0	62	109	19	0	0	0	0	190	0	190	190	0	1	0	166	23	190	0	1	189
15	100							3	0	0	206	20	91	95	0	165	41	0	0	206	0	10	196	0	0	170	36	104	102	5	201
16	0							4	0	224	15	174	65	0	0	2	0	14	223	213	26	153	86	8	5	185	41	198	41	21	218
17	100							5	0	90	0	10	50	30	0	9	0	0	81	67	23	90	0	54	0	36	0	30	60	8	82
18	0							6	220	0	0	26	164	30	0	0	0	0	220	1	219	131	89	0	0	158	62	206	14	0	220
19	50							7	0	210	0	2	29	179	0	0	0	24	186	208	2	210	0	36	0	125	49	63	147	53	157
20	100							8	0	128	0	19	109	0	0	0	0	18	110	96	32	128	0	30	0	80	18	128	0	51	77
21	0							9	0	110	0	97	13	0	0	0	0	0	110	78	32	110	0	0	0	110	0	109	1	70	40
22	0							10	0	0	181	120	61	0	0	113	22	38	8	164	17	0	181	5	0	135	41	174	7	19	162
(puste)								11	0	124	0	1	6	117	0	91	2	0	31	124	0	124	0	64	4	26	30	16	108	45	79
Suma końcowa	100							12	0	200	13	190	23	0	0	0	0	9	204	213	0	213	0	5	0	197	11	213	0	125	88
								13	0	257	0	244	13	0	0	4	0	16	237	208	49	247	10	18	0	213	26	191	66	16	241
								14	0	228	0	0	18	210	0	131	0	4	93	228	0	228	0	100	30	83	15	52	176	41	187
								15	0	141	0	141	0	0	0	30	0	4	107	114	27	141	0	0	0	137	4	141	0	18	123
								16	103	97	0	200	0	0	0	0	0	0	200	2	198	200	0	22	10	103	65	200	0	200	0
								17	0	199	0	199	0	0	0	0	0	0	199	167	32	199	0	0	0	199	0	199	0	84	115
								18	127	54	0	181	0	0	0	0	0	7	174	181	0	181	0	0	0	24	157	0	181	181	0
								19	190	0	0	0	0	0	190	0	0	18	172	190	0	26	164	0	0	177	13	26	164	189	1
								20	0	45	0	45	0	0	0	0	0	12	33	45	0	45	0	0	0	34	11	21	24	44	1
								21	0	125	0	125	0	0	0	0	125	0	0	125	0	125	0	0	0	125	0	118	7	125	0
								22	0	94	0	0	0	94	0	49	4	20	21	94	0	94	0	4	0	77	13	94	0	94	0

## Sheet: GROUPS
The number and percentage of endocarps of Cornus groups with various states of qualitative characters
SSH	Number of endocarps					Percentage of endocarps
	0	1	2	3	Total	0	1	2	3	Total
BW	1107	756	949		2812	39.367	26.8848	33.7482	0	100
CC	399				399	100	0	0	0	100
BB	226			190	416	54.3269	0	0	45.6731	100
DW	125		94		219	57.0776	0	42.9224	0	100
ASH	Number of endocarps					Percentage of endocarps
	0	1	2	3	Total	0	1	2	3	Total
BW	737	85	127	1863	2812	26.2091	3.02276	4.51636	66.2518	100
CC				399	399	0	0	0	100	100
BB			37	379	416	0	0	8.89423	91.1058	100
DW	49	129	20	21	219	22.3744	58.9041	9.13242	9.58904	100
BSH	Number of endocarps					Percentage of endocarps
	0	1	2	3	Total	0	1	2	3	Total
BW	377	93	1973	369	2812	13.4068	3.30725	70.1636	13.1223	100
CC	22	10	302	65	399	5.51378	2.50627	75.6892	16.2907	100
BB			235	181	416	0	0	56.4904	43.5096	100
DW	4		202	13	219	1.82648	0	92.2374	5.93607	100
SSF	Number of endocarps			Percenage of endocarps
	0	1	Total	0	1	Total
BW	2250	562	2812	80.0142	19.9858	100
CC	399		399	100	0	100
BB	252	164	416	60.5769	39.4231	100
DW	219		219	100	0	100
ACP	Number of endocarps			Percentage of endocarps
	0	1	Total	0	1	Total
BW	2195	617	2812	78.0583	21.9417	100
CC	169	230	399	42.3559	57.6441	100
BB	416		416	100	0	100
DW	219		219	100	0	100
VBP	Number of endocarps				Percentage of endocarps
	0	1	2	Total	0	1	2	Total
BW	410	1985	417	2812	14.5804	70.5903	14.8293	100
CC	103	296		399	25.8145	74.1855	0	100
BB	317	99		416	76.2019	23.7981	0	100
DW	0	219		219	0	100	0	100
FV	Number of endocarps			Percentage of endocarps
	0	1	Total	0	1	Total
BW	537	2275	2812	19.0967	80.9033	100
CC	284	115	399	71.1779	28.8221	100
BB	414	2	416	99.5192	0.480769	100
DW	219		219	100	0	100
DF	Number of endocarps			Percentage of endocarps
	0	1	Total	0	1	Total
BW	1942	870	2812	69.0612	30.9388	100
CC	399		399	100	0	100
BB	47	369	416	11.2981	88.7019	100
DW	212	7	219	96.8037	3.19635	100

## Sheet: SUBGENERA
The number and percentage of endocarps of Cornus subgenera with various states of qualitative characters
SSH	Number of endocarps					Percentage of endocarps
	0	1	2	3	Total	0	1	2	3	Total
Kraniopsis	1019	483	900		2402	42.423	20.1082	37.4688	0	100
Mesomora	88	273	49		410	21.4634	66.5854	11.9512	0	100
Cornus	399				399	100	0	0	0	100
Cynoxylon	226				226	100	0	0	0	100
Syncarpea				190	190	0	0	0	100	100
Arctocrania	125		94		219	57.0776	0	42.9224	0	100
ASH	Number of endocarps					Percentage of endocarps
	0	1	2	3	Total	0	1	2	3	Total
Kraniopsis	737	85	127	1453	2402	30.6828	3.53872	5.28726	60.4913	100
Mesomora				410	410	0	0	0	100	100
Cornus				399	399	0	0	0	100	100
Cynoxylon			19	207	226	0	0	8.40708	91.5929	100
Syncarpea			18	172	190	0	0	9.47368	90.5263	100
Arctocrania	49	129	20	21	219	22.3744	58.9041	9.13242	9.58904	100
BSH	Number of endocarps					Percentage of endocarps
	0	1	2	3	Total	0	1	2	3	Total
Kraniopsis	376	93	1649	284	2402	15.6536	3.87177	68.6511	11.8235	100
Mesomora	1		324	85	410	0.243902	0	79.0244	20.7317	100
Cornus	22	10	302	65	399	5.51378	2.50627	75.6892	16.2907	100
Cynoxylon			58	168	226	0	0	25.6637	74.3363	100
Syncarpea			177	13	190	0	0	93.1579	6.84211	100
Arctocrania	4		202	13	219	1.82648	0	92.2374	5.93607	100
SSF	Number of endocarps			Percenage of endocarps
	0	1	Total	0	1	Total
Kraniopsis	1929	473	2402	80.3081	19.6919	100
Mesomora	321	89	410	78.2927	21.7073	100
Cornus	399		399	100	0	100
Cynoxylon	226		226	100	0	100
Syncarpea	26	164	190	13.6842	86.3158	100
Arctocrania	219		219	100	0	100
ACP	Number of endocarps			Percentage of endocarps
	0	1	Total	0	1	Total
Kraniopsis	2194	208	2402	91.3405	8.65945	100
Mesomora	1	409	410	0.243902	99.7561	100
Cornus	169	230	399	42.3559	57.6441	100
Cynoxylon	226		226	100	0	100
Syncarpea	190		190	100	0	100
Arctocrania	219		219	100	0	100
VBP	Number of endocarps				Percentage of endocarps
	0	1	2	Total	0	1	2	Total
Kraniopsis		1985	417	2402	0	82.6395	17.3605	100
Mesomora	410			410	100	0	0	100
Cornus	103	296		399	25.8145	74.1855	0	100
Cynoxylon	127	99		226	56.1947	43.8053	0	100
Syncarpea	190			190	100	0	0	100
Arctocrania		219		219	0	100	0	100
FV	Number of endocarps			Percentage of endocarps
	0	1	Total	0	1	Total
Kraniopsis	536	1866	2402	22.3147	77.6853	100
Mesomora	1	409	410	0.243902	99.7561	100
Cornus	284	115	399	71.1779	28.8221	100
Cynoxylon	225	1	226	99.5575	0.442478	100
Syncarpea	189	1	190	99.4737	0.526316	100
Arctocrania	219		219	100	0	100
DF	Number of endocarps			Percentage of endocarps
	0	1	Total	0	1	Total
Kraniopsis	1546	856	2402	64.363	35.637	100
Mesomora	396	14	410	96.5854	3.41463	100
Cornus	399		399	100	0	100
Cynoxylon	21	205	226	9.29204	90.708	100
Syncarpea	26	164	190	13.6842	86.3158	100
Arctocrania	212	7	219	96.8037	3.19635	100

## Sheet: SPECIES
The number and percentage of endocarps of Cornus species with various states of qualitative characters
SSH	Number of endocarps					Percentage of endocarps
	0	1	2	3	Total	0	1	2	3	Total
C. alba	1	5	269		275	0.363636	1.81818	97.8182	0	100
C. alternifolia	62	109	19		190	32.6316	57.3684	10	0	100
C. amomum	20	91	95		206	9.70874	44.1748	46.1165	0	100
C. australis	174	65			239	72.8033	27.1967	0	0	100
C. bretschneideri	10	50	30		90	11.1111	55.5556	33.3333	0	100
C. controversa	26	164	30		220	11.8182	74.5455	13.6364	0	100
C. drummondii	2	29	179		210	0.952381	13.8095	85.2381	0	100
C. foemina	19	109			128	14.8438	85.1562	0	0	100
C. macrophylla	97	13			110	88.1818	11.8182	0	0	100
C. obliqua	120	61			181	66.2983	33.7017	0	0	100
C. occidentalis	1	6	117		124	0.806452	4.83871	94.3548	0	100
C. racemosa	190	23			213	89.2019	10.7981	0	0	100
C. sanguinea	244	13			257	94.9416	5.05837	0	0	100
C. sericea		18	210		228	0	7.89474	92.1053	0	100
C. walteri	141				141	100	0	0	0	100
C. mas	200				200	100	0	0	0	100
C. officinalis	199				199	100	0	0	0	100
C. florida	181				181	100	0	0	0	100
C. kousa				190	190	0	0	0	100	100
C. nuttalii	45				45	100	0	0	0	100
C. canadensis	125				125	100	0	0	0	100
C. suecica			94		94	0	0	100	0	100
ASH	Number of endocarps					Percentage of endocarps
	0	1	2	3	Total	0	1	2	3	Total
C. alba	192	20		63	275	69.8182	7.27273	0	22.9091	100
C. alternifolia				190	190	0	0	0	100	100
C. amomum	165	41			206	80.0971	19.9029	0	0	100
C. australis	2		14	223	239	0.83682	0	5.85774	93.3054	100
C. bretschneideri	9			81	90	10	0	0	90	100
C. controversa				220	220	0	0	0	100	100
C. drummondii			24	186	210	0	0	11.4286	88.5714	100
C. foemina			18	110	128	0	0	14.0625	85.9375	100
C. macrophylla				110	110	0	0	0	100	100
C. obliqua	113	22	38	8	181	62.4309	12.1547	20.9945	4.41989	100
C. occidentalis	91	2		31	124	73.3871	1.6129	0	25	100
C. racemosa			9	204	213	0	0	4.22535	95.7746	100
C. sanguinea	4		16	237	257	1.55642	0	6.22568	92.2179	100
C. sericea	131		4	93	228	57.4561	0	1.75439	40.7895	100
C. walteri	30		4	107	141	21.2766	0	2.83688	75.8865	100
C. mas				200	200	0	0	0	100	100
C. officinalis				199	199	0	0	0	100	100
C. florida			7	174	181	0	0	3.8674	96.1326	100
C. kousa			18	172	190	0	0	9.47368	90.5263	100
C. nuttalii			12	33	45	0	0	26.6667	73.3333	100
C. canadensis		125			125	0	100	0	0	100
C. suecica	49	4	20	21	94	52.1277	4.25532	21.2766	22.3404	100
BSH	Number of endocarps					Percentage of endocarps
	0	1	2	3	Total	0	1	2	3	Total
C. alba	56	54	152	13	275	20.3636	19.6364	55.2727	4.72727	100
C. alternifolia	1		166	23	190	0.526316	0	87.3684	12.1053	100
C. amomum			170	36	206	0	0	82.5243	17.4757	100
C. australis	8	5	185	41	239	3.34728	2.09205	77.4059	17.1548	100
C. bretschneideri	54		36		90	60	0	40	0	100
C. controversa			158	62	220	0	0	71.8182	28.1818	100
C. drummondii	36		125	49	210	17.1429	0	59.5238	23.3333	100
C. foemina	30		80	18	128	23.4375	0	62.5	14.0625	100
C. macrophylla			110		110	0	0	100	0	100
C. obliqua	5		135	41	181	2.76243	0	74.5856	22.6519	100
C. occidentalis	64	4	26	30	124	51.6129	3.22581	20.9677	24.1935	100
C. racemosa	5		197	11	213	2.34742	0	92.4883	5.16432	100
C. sanguinea	18		213	26	257	7.00389	0	82.8794	10.1167	100
C. sericea	100	30	83	15	228	43.8596	13.1579	36.4035	6.57895	100
C. walteri			137	4	141	0	0	97.1631	2.83688	100
C. mas	22	10	103	65	200	11	5	51.5	32.5	100
C. officinalis			199		199	0	0	100	0	100
C. florida			24	157	181	0	0	13.2597	86.7403	100
C. kousa			177	13	190	0	0	93.1579	6.84211	100
C. nuttalii			34	11	45	0	0	75.5556	24.4444	100
C. canadensis			125		125	0	0	100	0	100
C. suecica	4		77	13	94	4.25532	0	81.9149	13.8298	100
SSF	Number of endocarps			Percenage of endocarps
	0	1	Total	0	1	Total
C. alba	275		275	100	0	100
C. alternifolia	190		190	100	0	100
C. amomum	10	196	206	4.85437	95.1456	100
C. australis	153	86	239	64.0167	35.9833	100
C. bretschneideri	90		90	100	0	100
C. controversa	131	89	220	59.5455	40.4545	100
C. drummondii	210		210	100	0	100
C. foemina	128		128	100	0	100
C. macrophylla	110		110	100	0	100
C. obliqua		181	181	0	100	100
C. occidentalis	124		124	100	0	100
C. racemosa	213		213	100	0	100
C. sanguinea	247	10	257	96.1089	3.89105	100
C. sericea	228		228	100	0	100
C. walteri	141		141	100	0	100
C. mas	200		200	100	0	100
C. officinalis	199		199	100	0	100
C. florida	181		181	100	0	100
C. kousa	26	164	190	13.6842	86.3158	100
C. nuttalii	45		45	100	0	100
C. canadensis	125		125	100	0	100
C. suecica	94		94	100	0	100
ACP	Number of endocarps			Percentage of endocarps
	0	1	Total	0	1	Total
C. alba	275		275	100	0	100
C. alternifolia		190	190	0	100	100
C. amomum	206		206	100	0	100
C. australis	213	26	239	89.1213	10.8787	100
C. bretschneideri	67	23	90	74.4444	25.5556	100
C. controversa	1	219	220	0.454545	99.5455	100
C. drummondii	208	2	210	99.0476	0.952381	100
C. foemina	96	32	128	75	25	100
C. macrophylla	78	32	110	70.9091	29.0909	100
C. obliqua	164	17	181	90.6077	9.39227	100
C. occidentalis	124		124	100	0	100
C. racemosa	213		213	100	0	100
C. sanguinea	208	49	257	80.9339	19.0661	100
C. sericea	228		228	100	0	100
C. walteri	114	27	141	80.8511	19.1489	100
C. mas	2	198	200	1	99	100
C. officinalis	167	32	199	83.9196	16.0804	100
C. florida	181		181	100	0	100
C. kousa	190		190	100	0	100
C. nuttalii	45		45	100	0	100
C. canadensis	125		125	100	0	100
C. suecica	94		94	100	0	100
VBP	Number of endocarps				Percentage of endocarps
	0	1	2	Total	0	1	2	Total
C. alba		273	2	275	0	99.2727	0.727273	100
C. alternifolia	190			190	100	0	0	100
C. amomum			206	206	0	0	100	100
C. australis		224	15	239	0	93.7238	6.27615	100
C. bretschneideri		90		90	0	100	0	100
C. controversa	220			220	100	0	0	100
C. drummondii		210		210	0	100	0	100
C. foemina		128		128	0	100	0	100
C. macrophylla		110		110	0	100	0	100
C. obliqua			181	181	0	0	100	100
C. occidentalis		124		124	0	100	0	100
C. racemosa		200	13	213	0	93.8967	6.10329	100
C. sanguinea		257		257	0	100	0	100
C. sericea		228		228	0	100	0	100
C. walteri		141		141	0	100	0	100
C. mas	103	97		200	51.5	48.5	0	100
C. officinalis		199		199	0	100	0	100
C. florida	127	54		181	70.1657	29.8343	0	100
C. kousa	190			190	100	0	0	100
C. nuttalii		45		45	0	100	0	100
C. canadensis		125		125	0	100	0	100
C. suecica		94		94	0	100	0	100
FV	Number of endocarps			Percentage of endocarps
	0	1	Total	0	1	Total
C. alba	64	211	275	23.2727	76.7273	100
C. alternifolia	1	189	190	0.526316	99.4737	100
C. amomum	5	201	206	2.42718	97.5728	100
C. australis	21	218	239	8.78661	91.2134	100
C. bretschneideri	8	82	90	8.88889	91.1111	100
C. controversa		220	220	0	100	100
C. drummondii	53	157	210	25.2381	74.7619	100
C. foemina	51	77	128	39.8438	60.1562	100
C. macrophylla	70	40	110	63.6364	36.3636	100
C. obliqua	19	162	181	10.4972	89.5028	100
C. occidentalis	45	79	124	36.2903	63.7097	100
C. racemosa	125	88	213	58.6854	41.3146	100
C. sanguinea	16	241	257	6.22568	93.7743	100
C. sericea	41	187	228	17.9825	82.0175	100
C. walteri	18	123	141	12.766	87.234	100
C. mas	200		200	100	0	100
C. officinalis	84	115	199	42.2111	57.7889	100
C. florida	181		181	100	0	100
C. kousa	189	1	190	99.4737	0.526316	100
C. nuttalii	44	1	45	97.7778	2.22222	100
C. canadensis	125		125	100	0	100
C. suecica	94		94	100	0	100
DF	Number of endocarps			Percentage of endocarps
	0	1	Total	0	1	Total
C. alba	127	148	275	46.1818	53.8182	100
C. alternifolia	190		190	100	0	100
C. amomum	104	102	206	50.4854	49.5146	100
C. australis	198	41	239	82.8452	17.1548	100
C. bretschneideri	30	60	90	33.3333	66.6667	100
C. controversa	206	14	220	93.6364	6.36364	100
C. drummondii	63	147	210	30	70	100
C. foemina	128		128	100	0	100
C. macrophylla	109	1	110	99.0909	0.909091	100
C. obliqua	174	7	181	96.1326	3.8674	100
C. occidentalis	16	108	124	12.9032	87.0968	100
C. racemosa	213		213	100	0	100
C. sanguinea	191	66	257	74.3191	25.6809	100
C. sericea	52	176	228	22.807	77.193	100
C. walteri	141		141	100	0	100
C. mas	200		200	100	0	100
C. officinalis	199		199	100	0	100
C. florida		181	181	0	100	100
C. kousa	26	164	190	13.6842	86.3158	100
C. nuttalii	21	24	45	46.6667	53.3333	100
C. canadensis	118	7	125	94.4	5.6	100
C. suecica	94		94	100	0	100
