# Supplementary material for: The morphology and internal structure of dogwood (Cornus L.) endocarps in the taxonomy and phylogeny of the genus
Source: PeerJ. 2021 Oct 28;9:e12170. doi: 10.7717/peerj.12170 (PMC8557701; doi:10.7717/peerj.12170)
Supplement: Supplemental Information 6 [file peerj-09-12170-s006.xls]

## Sheet: Morphological data
Group	Subgenus	Species	stara numeracja gat IM	Specimen	SL	SW	ST	SL/SW	SW/ST	VN	FV%	ACL	ACW	FV	ACP	SSF	DF	SSH	ASH	BSH	VBP
BW	Kraniopsis	C. alba	1	1	5.6129	4.12903	2.06452	1.35938	2	8	0	0	0	0	0	0	0	2	1	1	1		Trait	Description	Type of trait:	Units of
BW	Kraniopsis	C. alba	1	1	5.29032	4.32258	2.12903	1.22388	2.0303	7	0	0	0	0	0	0	0	2	1	2	1		abbreviation		continuous (C)	measurement/
BW	Kraniopsis	C. alba	1	1	5.29032	4.58065	2.3871	1.15493	1.91892	6	0	0	0	0	0	0	0	2	1	2	1				discrete (D)	coding
BW	Kraniopsis	C. alba	1	1	4.3871	3.93548	2.25806	1.11475	1.74286	8	0	0	0	0	0	0	0	2	1	1	1		SL	Endocarp length	C	mm
BW	Kraniopsis	C. alba	1	1	4.51613	3.87097	2.12903	1.16667	1.81818	6	16.6667	0	0	1	0	0	0	2	1	3	1		ST	Endocarp thickness	C	mm
BW	Kraniopsis	C. alba	1	2	5.67742	4.51613	3.41935	1.25714	1.32075	8	0	0	0	0	0	0	0	2	0	2	1		SW	Endocarp width	C	mm
BW	Kraniopsis	C. alba	1	2	5.35484	5.09677	3.22581	1.05063	1.58	6	33.3333	0	0	1	0	0	0	2	0	2	1		SL/SW	Endocarp length-to-width ratio	C
BW	Kraniopsis	C. alba	1	2	4.90323	4.64516	2.58065	1.05556	1.8	6	0	0	0	0	0	0	0	2	0	2	1		SW/ST	Endocarp width -to-thickness ratio	C
BW	Kraniopsis	C. alba	1	2	5.22581	3.93548	2.32258	1.32787	1.69444	8	25	0	0	1	0	0	0	2	0	2	1		VN	Number of vascular bundles on endocarp surface	C
BW	Kraniopsis	C. alba	1	2	5.03226	3.87097	2.64516	1.3	1.46341	7	14.2857	0	0	1	0	0	0	2	0	3	1		FV%	Share of forked vascular bundles	C	%
BW	Kraniopsis	C. alba	1	3	5.48387	3.67742	2.32258	1.49123	1.58333	6	33.3333	0	0	1	0	0	0	2	0	2	1		ACL	Apical cavity length	C	mm
BW	Kraniopsis	C. alba	1	3	5.22581	3.87097	2.19355	1.35	1.76471	6	0	0	0	0	0	0	1	2	0	2	1		ACW	Apical cavity width	C	mm
BW	Kraniopsis	C. alba	1	3	5.54839	3.54839	2.19355	1.56364	1.61765	6	16.6667	0	0	1	0	0	0	2	0	2	1		ACP	Absence/presence of apical cavity	D	0-1
BW	Kraniopsis	C. alba	1	3	5.41935	3.54839	2.19355	1.52727	1.61765	5	0	0	0	0	0	0	1	2	0	3	1		DF	Absence/presence of distinctive furrow	D	0-1
BW	Kraniopsis	C. alba	1	3	5.35484	3.6129	2.25806	1.48214	1.6	8	0	0	0	0	0	0	1	2	0	1	1		FV	Absence/presence of forked vascular bundles	D	0-1
BW	Kraniopsis	C. alba	1	4	5.48387	3.67742	2.19355	1.49123	1.67647	7	0	0	0	0	0	0	1	2	3	1	1		SSF	Smooth/rough endocarp surface	D	0-1
BW	Kraniopsis	C. alba	1	4	6.77419	3.74194	2.3871	1.81034	1.56757	8	12.5	0	0	1	0	0	1	2	3	1	1		SSH	Endocarp shape in vertical projection	D	0-2
BW	Kraniopsis	C. alba	1	4	6.19355	3.74194	2.25806	1.65517	1.65714	6	0	0	0	0	0	0	1	2	3	1	1		ASH	Apical shape	D	0-3
BW	Kraniopsis	C. alba	1	4	5.67742	3.80645	2.32258	1.49153	1.63889	6	0	0	0	0	0	0	1	2	3	1	1		BSH	Basal shape	D	0-3
BW	Kraniopsis	C. alba	1	4	5.93548	3.6129	2.12903	1.64286	1.69697	8	0	0	0	0	0	0	1	2	3	1	1		VBP	Position of vascular bundles on endocarp surface	D	0-2
BW	Kraniopsis	C. alba	1	5	4.83871	3.48387	2.3871	1.38889	1.45946	8	0	0	0	0	0	0	0	2	0	1	1
BW	Kraniopsis	C. alba	1	5	5.29032	3.48387	2.51613	1.51852	1.38462	8	37.5	0	0	1	0	0	0	2	0	1	1
BW	Kraniopsis	C. alba	1	5	5.29032	3.48387	2.19355	1.51852	1.58824	8	25	0	0	1	0	0	0	2	0	1	1
BW	Kraniopsis	C. alba	1	5	4.90323	3.48387	2.3871	1.40741	1.45946	8	12.5	0	0	1	0	0	0	2	0	1	1
BW	Kraniopsis	C. alba	1	5	4.96774	3.67742	2.45161	1.35088	1.5	6	50	0	0	1	0	0	0	2	0	1	1
BW	Kraniopsis	C. alba	1	5	5.29032	3.87097	2.32258	1.36667	1.66667	7	71.4286	0	0	1	0	0	0	2	0	1	1
BW	Kraniopsis	C. alba	1	6	4.77419	5.29032	3.93548	0.902439	1.34426	7	28.5714	0	0	1	0	0	1	1	3	2	1
BW	Kraniopsis	C. alba	1	6	4.96774	5.41935	4.06452	0.916667	1.33333	8	12.5	0	0	1	0	0	1	2	3	2	1
BW	Kraniopsis	C. alba	1	6	5.22581	5.48387	3.80645	0.952941	1.44068	8	37.5	0	0	1	0	0	1	2	3	2	1
BW	Kraniopsis	C. alba	1	6	3.48387	4.51613	3.29032	0.771429	1.37255	8	12.5	0	0	1	0	0	1	2	3	2	1
BW	Kraniopsis	C. alba	1	6	4.77419	3.80645	3.09677	1.25424	1.22917	6	0	0	0	0	0	0	0	1	3	2	1
BW	Kraniopsis	C. alba	1	6	4.3871	5.35484	3.35484	0.819277	1.59615	8	12.5	0	0	1	0	0	1	2	3	2	1
BW	Kraniopsis	C. alba	1	6	3.80645	5.22581	3.48387	0.728395	1.5	7	28.5714	0	0	1	0	0	1	2	3	2	1
BW	Kraniopsis	C. alba	1	6	3.87097	4.96774	3.22581	0.779221	1.54	7	28.5714	0	0	1	0	0	1	2	3	2	1
BW	Kraniopsis	C. alba	1	6	4.25806	5.16129	3.93548	0.825	1.31148	8	37.5	0	0	1	0	0	1	1	3	2	1
BW	Kraniopsis	C. alba	1	6	3.93548	5.22581	4.06452	0.753086	1.28571	8	25	0	0	1	0	0	1	1	3	2	1
BW	Kraniopsis	C. alba	1	6	4	5.09677	3.48387	0.78481	1.46296	9	0	0	0	0	0	0	1	2	3	2	1
BW	Kraniopsis	C. alba	1	6	4.70968	5.54839	4	0.848837	1.3871	8	25	0	0	1	0	0	1	2	3	2	1
BW	Kraniopsis	C. alba	1	6	3.67742	4.83871	3.48387	0.76	1.38889	8	25	0	0	1	0	0	1	2	0	0	1
BW	Kraniopsis	C. alba	1	6	3.67742	5.29032	3.48387	0.695122	1.51852	9	33.3333	0	0	1	0	0	1	2	3	0	1
BW	Kraniopsis	C. alba	1	6	4.19355	5.22581	3.6129	0.802469	1.44643	8	0	0	0	0	0	0	1	2	3	2	1
BW	Kraniopsis	C. alba	1	6	3.29032	4.3871	3.03226	0.75	1.44681	8	25	0	0	1	0	0	1	2	3	0	1
BW	Kraniopsis	C. alba	1	6	3.6129	4.3871	2.77419	0.823529	1.5814	6	16.6667	0	0	1	0	0	1	2	3	2	1
BW	Kraniopsis	C. alba	1	7	4.06452	4.25806	3.09677	0.954545	1.375	7	28.5714	0	0	1	0	0	0	2	0	2	1
BW	Kraniopsis	C. alba	1	7	3.29032	4.12903	2.83871	0.796875	1.45455	8	25	0	0	1	0	0	0	2	0	2	1
BW	Kraniopsis	C. alba	1	7	3.80645	4.12903	2.96774	0.921875	1.3913	8	25	0	0	1	0	0	1	2	0	2	1
BW	Kraniopsis	C. alba	1	7	4.06452	4.45161	3.09677	0.913043	1.4375	8	0	0	0	0	0	0	1	2	0	2	1
BW	Kraniopsis	C. alba	1	7	3.74194	4.3871	3.29032	0.852941	1.33333	8	25	0	0	1	0	0	1	2	0	2	1
BW	Kraniopsis	C. alba	1	7	4.12903	4.51613	3.09677	0.914286	1.45833	8	50	0	0	1	0	0	0	2	0	2	1
BW	Kraniopsis	C. alba	1	7	4.06452	4.12903	2.96774	0.984375	1.3913	8	12.5	0	0	1	0	0	1	2	0	2	1
BW	Kraniopsis	C. alba	1	7	3.93548	4.3871	3.22581	0.897059	1.36	7	28.5714	0	0	1	0	0	0	2	0	2	1
BW	Kraniopsis	C. alba	1	7	3.6129	4.06452	2.90323	0.888889	1.4	8	12.5	0	0	1	0	0	1	2	0	2	1
BW	Kraniopsis	C. alba	1	7	4.12903	4.3871	2.90323	0.941176	1.51111	7	28.5714	0	0	1	0	0	1	2	0	2	1
BW	Kraniopsis	C. alba	1	7	4.06452	4.32258	3.09677	0.940299	1.39583	8	0	0	0	0	0	0	1	2	0	2	1
BW	Kraniopsis	C. alba	1	7	3.93548	4.3871	3.03226	0.897059	1.44681	8	0	0	0	0	0	0	1	2	0	2	1
BW	Kraniopsis	C. alba	1	7	3.93548	3.74194	2.45161	1.05172	1.52632	7	0	0	0	0	0	0	1	2	0	2	1
BW	Kraniopsis	C. alba	1	7	4.32258	4.19355	3.35484	1.03077	1.25	8	25	0	0	1	0	0	1	2	0	2	1
BW	Kraniopsis	C. alba	1	7	4.06452	4.3871	3.22581	0.926471	1.36	8	50	0	0	1	0	0	1	2	0	2	1
BW	Kraniopsis	C. alba	1	7	4.19355	4.32258	3.16129	0.970149	1.36735	8	12.5	0	0	1	0	0	0	2	0	2	1
BW	Kraniopsis	C. alba	1	7	3.6129	3.93548	2.64516	0.918033	1.4878	7	28.5714	0	0	1	0	0	1	2	0	2	1
BW	Kraniopsis	C. alba	1	7	3.93548	4.58065	3.22581	0.859155	1.42	8	25	0	0	1	0	0	0	2	0	2	1
BW	Kraniopsis	C. alba	1	7	4.25806	4	2.58065	1.06452	1.55	8	12.5	0	0	1	0	0	1	2	0	2	1
BW	Kraniopsis	C. alba	1	7	4.12903	4.3871	3.41935	0.941176	1.28302	7	42.8571	0	0	1	0	0	0	2	0	2	1
BW	Kraniopsis	C. alba	1	7	3.87097	4.06452	2.83871	0.952381	1.43182	8	12.5	0	0	1	0	0	1	2	0	2	1
BW	Kraniopsis	C. alba	1	7	4.06452	4.12903	2.90323	0.984375	1.42222	7	42.8571	0	0	1	0	0	1	2	0	2	1
BW	Kraniopsis	C. alba	1	7	3.93548	4.51613	3.22581	0.871429	1.4	8	12.5	0	0	1	0	0	1	2	0	2	1
BW	Kraniopsis	C. alba	1	7	4.19355	4.12903	2.90323	1.01562	1.42222	7	42.8571	0	0	1	0	0	1	2	0	2	1
BW	Kraniopsis	C. alba	1	7	4.19355	4.58065	3.35484	0.915493	1.36538	8	25	0	0	1	0	0	0	2	0	2	1
BW	Kraniopsis	C. alba	1	7	3.87097	4.12903	2.90323	0.9375	1.42222	7	42.8571	0	0	1	0	0	1	2	0	2	1
BW	Kraniopsis	C. alba	1	7	4.19355	4.19355	2.96774	1	1.41304	8	25	0	0	1	0	0	1	2	0	2	1
BW	Kraniopsis	C. alba	1	7	4.12903	4.3871	3.03226	0.941176	1.44681	8	0	0	0	0	0	0	1	2	0	2	1
BW	Kraniopsis	C. alba	1	7	3.80645	4.58065	3.03226	0.830986	1.51064	8	0	0	0	0	0	0	1	2	0	2	1
BW	Kraniopsis	C. alba	1	7	3.67742	4.58065	3.03226	0.802817	1.51064	7	14.2857	0	0	1	0	0	0	2	0	2	1
BW	Kraniopsis	C. alba	1	8	4	4.64516	3.09677	0.861111	1.5	7	14.2857	0	0	1	0	0	0	2	0	2	1
BW	Kraniopsis	C. alba	1	8	5.03226	4.3871	2.90323	1.14706	1.51111	7	14.2857	0	0	1	0	0	1	2	0	2	1
BW	Kraniopsis	C. alba	1	8	4.32258	4.77419	3.22581	0.905405	1.48	8	25	0	0	1	0	0	0	2	0	2	1
BW	Kraniopsis	C. alba	1	8	4.32258	4.77419	3.09677	0.905405	1.54167	8	12.5	0	0	1	0	0	1	2	0	2	1
BW	Kraniopsis	C. alba	1	8	4.45161	4.32258	2.64516	1.02985	1.63415	7	28.5714	0	0	1	0	0	0	2	0	2	1
BW	Kraniopsis	C. alba	1	8	4.32258	4.77419	2.83871	0.905405	1.68182	8	0	0	0	0	0	0	1	2	0	2	1
BW	Kraniopsis	C. alba	1	8	4.45161	4.64516	3.03226	0.958333	1.53191	7	28.5714	0	0	1	0	0	0	2	0	2	1
BW	Kraniopsis	C. alba	1	8	4.32258	4.83871	3.03226	0.893333	1.59574	8	25	0	0	1	0	0	0	2	0	2	1
BW	Kraniopsis	C. alba	1	8	4.12903	4.77419	3.16129	0.864865	1.5102	8	25	0	0	1	0	0	0	2	0	2	1
BW	Kraniopsis	C. alba	1	8	4.12903	5.09677	2.96774	0.810127	1.71739	7	0	0	0	0	0	0	0	2	0	2	1
BW	Kraniopsis	C. alba	1	8	4.32258	4.3871	3.03226	0.985294	1.44681	7	28.5714	0	0	1	0	0	0	2	0	2	1
BW	Kraniopsis	C. alba	1	8	4.64516	4.51613	3.22581	1.02857	1.4	7	14.2857	0	0	1	0	0	0	2	0	2	1
BW	Kraniopsis	C. alba	1	8	4.32258	5.09677	3.48387	0.848101	1.46296	6	50	0	0	1	0	0	0	2	0	2	1
BW	Kraniopsis	C. alba	1	8	4.45161	4.3871	3.03226	1.01471	1.44681	8	37.5	0	0	1	0	0	0	2	0	2	1
BW	Kraniopsis	C. alba	1	8	3.67742	4.64516	3.09677	0.791667	1.5	8	25	0	0	1	0	0	0	2	0	2	1
BW	Kraniopsis	C. alba	1	8	4.45161	4.3871	3.03226	1.01471	1.44681	7	0	0	0	0	0	0	0	2	0	2	1
BW	Kraniopsis	C. alba	1	8	4.12903	4.64516	2.96774	0.888889	1.56522	8	25	0	0	1	0	0	0	2	0	2	1
BW	Kraniopsis	C. alba	1	8	3.93548	5.16129	2.96774	0.7625	1.73913	7	28.5714	0	0	1	0	0	0	2	0	2	1
BW	Kraniopsis	C. alba	1	9	4	4.58065	3.29032	0.873239	1.39216	8	25	0	0	1	0	0	1	2	0	2	1
BW	Kraniopsis	C. alba	1	9	4.12903	4.96774	3.03226	0.831169	1.6383	8	37.5	0	0	1	0	0	0	2	0	2	1
BW	Kraniopsis	C. alba	1	9	4.51613	5.35484	3.22581	0.843373	1.66	8	12.5	0	0	1	0	0	1	2	0	2	1
BW	Kraniopsis	C. alba	1	9	4.64516	5.16129	3.35484	0.9	1.53846	8	37.5	0	0	1	0	0	0	2	0	2	1
BW	Kraniopsis	C. alba	1	9	4.96774	4.64516	3.6129	1.06944	1.28571	7	42.8571	0	0	1	0	0	0	2	0	2	1
BW	Kraniopsis	C. alba	1	9	4.77419	5.35484	3.29032	0.891566	1.62745	7	42.8571	0	0	1	0	0	0	2	0	2	1
BW	Kraniopsis	C. alba	1	9	4.96774	5.09677	3.29032	0.974684	1.54902	8	12.5	0	0	1	0	0	0	2	0	2	1
BW	Kraniopsis	C. alba	1	9	4.12903	4.83871	2.96774	0.853333	1.63043	8	37.5	0	0	1	0	0	0	2	3	2	1
BW	Kraniopsis	C. alba	1	9	5.22581	5.03226	3.6129	1.03846	1.39286	8	37.5	0	0	1	0	0	0	2	0	2	1
BW	Kraniopsis	C. alba	1	9	5.03226	4.77419	3.48387	1.05405	1.37037	8	37.5	0	0	1	0	0	0	2	0	2	1
BW	Kraniopsis	C. alba	1	9	4.32258	5.16129	3.35484	0.8375	1.53846	8	25	0	0	1	0	0	1	2	0	2	1
BW	Kraniopsis	C. alba	1	9	4.96774	4.58065	3.48387	1.08451	1.31481	6	33.3333	0	0	1	0	0	0	2	0	2	1
BW	Kraniopsis	C. alba	1	9	5.03226	4.58065	3.6129	1.09859	1.26786	8	62.5	0	0	1	0	0	1	2	3	2	1
BW	Kraniopsis	C. alba	1	9	4.70968	4.96774	3.03226	0.948052	1.6383	7	42.8571	0	0	1	0	0	1	2	3	2	1
BW	Kraniopsis	C. alba	1	9	4.90323	4.3871	3.09677	1.11765	1.41667	7	14.2857	0	0	1	0	0	0	2	0	0	1
BW	Kraniopsis	C. alba	1	9	5.03226	4.90323	3.67742	1.02632	1.33333	8	12.5	0	0	1	0	0	1	2	0	0	1
BW	Kraniopsis	C. alba	1	9	4.70968	4.64516	3.29032	1.01389	1.41176	8	12.5	0	0	1	0	0	1	2	0	2	1
BW	Kraniopsis	C. alba	1	9	4.96774	4.51613	2.90323	1.1	1.55556	7	0	0	0	0	0	0	0	2	0	2	1
BW	Kraniopsis	C. alba	1	9	4.06452	4.83871	3.16129	0.84	1.53061	8	0	0	0	0	0	0	1	2	0	2	1
BW	Kraniopsis	C. alba	1	9	3.93548	4.45161	2.96774	0.884058	1.5	8	25	0	0	1	0	0	0	2	0	2	1
BW	Kraniopsis	C. alba	1	9	3.93548	5.41935	3.29032	0.72619	1.64706	8	25	0	0	1	0	0	1	2	0	2	1
BW	Kraniopsis	C. alba	1	9	4.51613	5.16129	3.16129	0.875	1.63265	8	25	0	0	1	0	0	1	2	0	2	1
BW	Kraniopsis	C. alba	1	10	4.83871	4.3871	2.58065	1.10294	1.7	8	12.5	0	0	1	0	0	0	2	0	1	1
BW	Kraniopsis	C. alba	1	10	4.83871	3.74194	2	1.2931	1.87097	7	28.5714	0	0	1	0	0	0	2	0	1	1
BW	Kraniopsis	C. alba	1	10	3.87097	4.06452	2.25806	0.952381	1.8	8	0	0	0	0	0	0	0	2	0	1	1
BW	Kraniopsis	C. alba	1	10	4.3871	3.74194	2	1.17241	1.87097	8	0	0	0	0	0	0	0	2	0	1	1
BW	Kraniopsis	C. alba	1	10	5.16129	4.3871	2.12903	1.17647	2.06061	8	0	0	0	0	0	0	0	2	0	1	1
BW	Kraniopsis	C. alba	1	10	4.77419	3.80645	2	1.25424	1.90323	8	12.5	0	0	1	0	0	0	2	0	1	1
BW	Kraniopsis	C. alba	1	10	4.19355	3.93548	2.19355	1.06557	1.79412	7	0	0	0	0	0	0	0	2	0	1	1
BW	Kraniopsis	C. alba	1	10	5.74194	3.54839	2.12903	1.61818	1.66667	7	0	0	0	0	0	0	0	2	0	1	1
BW	Kraniopsis	C. alba	1	10	5.67742	4	2.12903	1.41935	1.87879	8	0	0	0	0	0	0	0	2	0	1	1
BW	Kraniopsis	C. alba	1	10	4.64516	3.74194	2	1.24138	1.87097	8	25	0	0	1	0	0	0	2	0	1	1
BW	Kraniopsis	C. alba	1	10	4.90323	4.45161	2.25806	1.10145	1.97143	8	0	0	0	0	0	0	0	2	0	1	1
BW	Kraniopsis	C. alba	1	10	5.03226	4.19355	2.06452	1.2	2.03125	7	0	0	0	0	0	0	0	2	0	1	1
BW	Kraniopsis	C. alba	1	11	4.77419	3.74194	2.12903	1.27586	1.75758	7	42.8571	0	0	1	0	0	0	2	1	1	1
BW	Kraniopsis	C. alba	1	11	5.41935	3.6129	2	1.5	1.80645	8	12.5	0	0	1	0	0	0	2	0	1	1
BW	Kraniopsis	C. alba	1	11	5.87097	3.22581	2.45161	1.82	1.31579	8	0	0	0	0	0	0	0	2	1	0	1
BW	Kraniopsis	C. alba	1	11	5.6129	3.6129	1.93548	1.55357	1.86667	8	0	0	0	0	0	0	0	2	1	1	1
BW	Kraniopsis	C. alba	1	11	5.16129	3.80645	2.19355	1.35593	1.73529	7	14.2857	0	0	1	0	0	0	2	0	0	1
BW	Kraniopsis	C. alba	1	11	5.54839	3.87097	2.25806	1.43333	1.71429	7	14.2857	0	0	1	0	0	0	2	0	1	1
BW	Kraniopsis	C. alba	1	11	5.67742	4.19355	2.3871	1.35385	1.75676	8	12.5	0	0	1	0	0	0	2	1	1	1
BW	Kraniopsis	C. alba	1	11	5.41935	4.19355	2.25806	1.29231	1.85714	8	0	0	0	0	0	0	0	2	0	1	1
BW	Kraniopsis	C. alba	1	11	5.29032	3.93548	2.12903	1.34426	1.84848	7	14.2857	0	0	1	0	0	0	2	0	1	1
BW	Kraniopsis	C. alba	1	11	5.48387	3.87097	2.3871	1.41667	1.62162	8	37.5	0	0	1	0	0	0	2	0	1	1
BW	Kraniopsis	C. alba	1	11	5.41935	4.19355	2.70968	1.29231	1.54762	8	12.5	0	0	1	0	0	0	2	0	1	1
BW	Kraniopsis	C. alba	1	11	5.48387	3.93548	1.93548	1.39344	2.03333	7	28.5714	0	0	1	0	0	0	2	0	1	1
BW	Kraniopsis	C. alba	1	11	5.35484	4.19355	2.19355	1.27692	1.91176	8	12.5	0	0	1	0	0	0	2	1	1	1
BW	Kraniopsis	C. alba	1	11	5.09677	3.87097	2.19355	1.31667	1.76471	8	0	0	0	0	0	0	0	2	0	1	1
BW	Kraniopsis	C. alba	1	11	5.41935	3.80645	2.32258	1.42373	1.63889	8	25	0	0	1	0	0	0	2	1	1	1
BW	Kraniopsis	C. alba	1	11	5.74194	4	2.32258	1.43548	1.72222	8	0	0	0	0	0	0	0	2	1	1	1
BW	Kraniopsis	C. alba	1	11	5.67742	3.80645	2.25806	1.49153	1.68571	8	0	0	0	0	0	0	0	2	1	1	1
BW	Kraniopsis	C. alba	1	11	5.6129	4.25806	2.64516	1.31818	1.60976	8	25	0	0	1	0	0	0	2	1	1	1
BW	Kraniopsis	C. alba	1	11	4.83871	3.6129	2.12903	1.33929	1.69697	8	0	0	0	0	0	0	0	2	0	1	1
BW	Kraniopsis	C. alba	1	11	5.80645	3.80645	2.06452	1.52542	1.84375	8	0	0	0	0	0	0	0	2	0	1	1
BW	Kraniopsis	C. alba	1	11	4.77419	3.80645	2.25806	1.25424	1.68571	8	0	0	0	0	0	0	0	2	0	1	1
BW	Kraniopsis	C. alba	1	11	5.16129	4.06452	2.19355	1.26984	1.85294	8	12.5	0	0	1	0	0	0	2	0	1	1
BW	Kraniopsis	C. alba	1	11	5.80645	4.12903	2.12903	1.40625	1.93939	8	0	0	0	0	0	0	0	2	0	1	1
BW	Kraniopsis	C. alba	1	11	5.22581	3.74194	2.3871	1.39655	1.56757	8	25	0	0	1	0	0	0	2	0	1	1
BW	Kraniopsis	C. alba	1	11	4.58065	3.80645	2.19355	1.20339	1.73529	8	0	0	0	0	0	0	0	2	1	1	1
BW	Kraniopsis	C. alba	1	11	5.16129	3.87097	2.19355	1.33333	1.76471	8	0	0	0	0	0	0	0	2	1	1	1
BW	Kraniopsis	C. alba	1	11	5.54839	3.93548	2.58065	1.40984	1.525	8	0	0	0	0	0	0	0	2	0	1	1
BW	Kraniopsis	C. alba	1	11	5.80645	3.6129	2.06452	1.60714	1.75	8	12.5	0	0	1	0	0	0	2	1	1	1
BW	Kraniopsis	C. alba	1	11	5.09677	4	2.3871	1.27419	1.67568	8	25	0	0	1	0	0	0	2	0	1	1
BW	Kraniopsis	C. alba	1	11	4.77419	3.87097	2.3871	1.23333	1.62162	8	0	0	0	0	0	0	0	2	1	1	1
BW	Kraniopsis	C. alba	1	12	4	5.29032	3.74194	0.756098	1.41379	8	37.5	0	0	1	0	0	1	2	3	2	2
BW	Kraniopsis	C. alba	1	12	3.48387	5.41935	3.16129	0.642857	1.71429	8	25	0	0	1	0	0	1	2	3	2	1
BW	Kraniopsis	C. alba	1	12	3.48387	4.58065	2.77419	0.760563	1.65116	7	28.5714	0	0	1	0	0	1	2	3	2	1
BW	Kraniopsis	C. alba	1	12	3.35484	5.35484	3.29032	0.626506	1.62745	7	28.5714	0	0	1	0	0	1	2	3	2	1
BW	Kraniopsis	C. alba	1	12	3.80645	5.29032	3.48387	0.719512	1.51852	7	57.1429	0	0	1	0	0	1	2	3	2	1
BW	Kraniopsis	C. alba	1	12	3.41935	4.83871	3.22581	0.706667	1.5	9	22.2222	0	0	1	0	0	1	2	3	2	1
BW	Kraniopsis	C. alba	1	12	3.67742	5.67742	3.22581	0.647727	1.76	8	12.5	0	0	1	0	0	1	2	3	2	1
BW	Kraniopsis	C. alba	1	12	3.22581	5.48387	2.83871	0.588235	1.93182	7	28.5714	0	0	1	0	0	1	2	3	3	2
BW	Kraniopsis	C. alba	1	12	3.74194	5.93548	3.16129	0.630435	1.87755	8	25	0	0	1	0	0	1	2	3	2	1
BW	Kraniopsis	C. alba	1	12	3.80645	5.74194	3.29032	0.662921	1.7451	8	12.5	0	0	1	0	0	1	2	3	0	1
BW	Kraniopsis	C. alba	1	12	3.29032	5.16129	2.58065	0.6375	2	7	14.2857	0	0	1	0	0	1	2	3	2	1
BW	Kraniopsis	C. alba	1	12	3.67742	5.29032	3.09677	0.695122	1.70833	9	55.5556	0	0	1	0	0	1	2	3	2	1
BW	Kraniopsis	C. alba	1	12	3.87097	5.80645	3.09677	0.666667	1.875	8	0	0	0	0	0	0	1	2	3	2	1
BW	Kraniopsis	C. alba	1	12	3.54839	5.48387	2.83871	0.647059	1.93182	8	37.5	0	0	1	0	0	1	2	3	2	1
BW	Kraniopsis	C. alba	1	12	3.54839	5.03226	3.03226	0.705128	1.65957	7	28.5714	0	0	1	0	0	1	2	3	2	1
BW	Kraniopsis	C. alba	1	12	3.29032	5.16129	2.70968	0.6375	1.90476	8	25	0	0	1	0	0	1	2	3	2	1
BW	Kraniopsis	C. alba	1	12	3.41935	5.48387	2.70968	0.623529	2.02381	8	12.5	0	0	1	0	0	1	2	3	2	1
BW	Kraniopsis	C. alba	1	12	3.74194	5.80645	3.09677	0.644444	1.875	8	12.5	0	0	1	0	0	1	2	3	2	1
BW	Kraniopsis	C. alba	1	12	3.48387	5.54839	2.70968	0.627907	2.04762	8	12.5	0	0	1	0	0	1	2	3	3	1
BW	Kraniopsis	C. alba	1	12	3.80645	4.90323	2.70968	0.776316	1.80952	8	12.5	0	0	1	0	0	1	2	3	2	1
BW	Kraniopsis	C. alba	1	12	4.19355	5.48387	3.09677	0.764706	1.77083	8	12.5	0	0	1	0	0	1	2	3	2	1
BW	Kraniopsis	C. alba	1	12	3.67742	5.67742	3.48387	0.647727	1.62963	8	0	0	0	0	0	0	1	2	3	0	1
BW	Kraniopsis	C. alba	1	12	3.35484	5.09677	2.90323	0.658228	1.75556	8	12.5	0	0	1	0	0	1	2	3	2	1
BW	Kraniopsis	C. alba	1	12	3.87097	4.70968	3.35484	0.821918	1.40385	8	25	0	0	1	0	0	1	2	3	2	1
BW	Kraniopsis	C. alba	1	12	3.35484	5.03226	2.3871	0.666667	2.10811	8	25	0	0	1	0	0	1	2	3	2	1
BW	Kraniopsis	C. alba	1	12	3.74194	4.83871	2.70968	0.773333	1.78571	8	0	0	0	0	0	0	1	2	3	2	1
BW	Kraniopsis	C. alba	1	12	3.67742	5.03226	2.70968	0.730769	1.85714	6	0	0	0	0	0	0	1	2	3	2	1
BW	Kraniopsis	C. alba	1	12	3.09677	4.90323	2.64516	0.631579	1.85366	8	12.5	0	0	1	0	0	1	2	3	2	1
BW	Kraniopsis	C. alba	1	12	3.41935	5.03226	2.90323	0.679487	1.73333	8	0	0	0	0	0	0	1	2	3	2	1
BW	Kraniopsis	C. alba	1	12	4.06452	5.35484	3.87097	0.759036	1.38333	6	33.3333	0	0	1	0	0	1	1	3	2	1
BW	Kraniopsis	C. alba	1	13	4.70968	5.16129	3.54839	0.9125	1.45455	8	12.5	0	0	1	0	0	1	2	0	0	1
BW	Kraniopsis	C. alba	1	13	4	4.83871	3.48387	0.826667	1.38889	9	55.5556	0	0	1	0	0	1	2	0	3	1
BW	Kraniopsis	C. alba	1	13	4.19355	4.96774	3.22581	0.844156	1.54	8	12.5	0	0	1	0	0	1	2	0	0	1
BW	Kraniopsis	C. alba	1	13	4.3871	5.22581	3.29032	0.839506	1.58824	8	50	0	0	1	0	0	1	2	0	0	1
BW	Kraniopsis	C. alba	1	13	5.29032	5.16129	3.16129	1.025	1.63265	7	57.1429	0	0	1	0	0	1	2	0	0	1
BW	Kraniopsis	C. alba	1	13	4.96774	4.64516	3.22581	1.06944	1.44	8	50	0	0	1	0	0	1	2	0	0	1
BW	Kraniopsis	C. alba	1	13	5.29032	5.09677	3.16129	1.03797	1.61224	8	0	0	0	0	0	0	1	2	0	0	1
BW	Kraniopsis	C. alba	1	13	4.96774	5.29032	3.48387	0.939024	1.51852	8	25	0	0	1	0	0	1	2	0	0	1
BW	Kraniopsis	C. alba	1	13	4.45161	4.83871	3.16129	0.92	1.53061	6	33.3333	0	0	1	0	0	1	2	0	0	1
BW	Kraniopsis	C. alba	1	13	4.90323	4.90323	3.41935	1	1.43396	8	25	0	0	1	0	0	1	2	0	0	1
BW	Kraniopsis	C. alba	1	13	4.25806	4.90323	3.41935	0.868421	1.43396	8	12.5	0	0	1	0	0	1	2	0	0	1
BW	Kraniopsis	C. alba	1	13	4.12903	4.83871	3.41935	0.853333	1.41509	8	12.5	0	0	1	0	0	1	2	3	0	1
BW	Kraniopsis	C. alba	1	13	4.51613	4.96774	3.22581	0.909091	1.54	8	12.5	0	0	1	0	0	1	2	3	0	1
BW	Kraniopsis	C. alba	1	13	4.51613	4.70968	3.48387	0.958904	1.35185	8	25	0	0	1	0	0	1	2	3	2	1
BW	Kraniopsis	C. alba	1	13	4.64516	5.09677	3.41935	0.911392	1.49057	8	50	0	0	1	0	0	1	2	0	0	1
BW	Kraniopsis	C. alba	1	13	4.51613	4.64516	3.16129	0.972222	1.46939	8	25	0	0	1	0	0	1	2	0	0	1
BW	Kraniopsis	C. alba	1	13	4.3871	4.19355	3.29032	1.04615	1.27451	8	12.5	0	0	1	0	0	1	2	0	0	1
BW	Kraniopsis	C. alba	1	13	4.25806	4.19355	3.41935	1.01538	1.22642	7	14.2857	0	0	1	0	0	1	2	0	0	1
BW	Kraniopsis	C. alba	1	13	4.51613	4.96774	3.22581	0.909091	1.54	8	12.5	0	0	1	0	0	1	2	0	0	1
BW	Kraniopsis	C. alba	1	13	4.96774	4.70968	3.16129	1.05479	1.4898	7	28.5714	0	0	1	0	0	1	2	0	0	1
BW	Kraniopsis	C. alba	1	13	4.45161	4.64516	2.83871	0.958333	1.63636	8	0	0	0	0	0	0	1	2	0	0	1
BW	Kraniopsis	C. alba	1	13	5.03226	4.96774	3.22581	1.01299	1.54	7	14.2857	0	0	1	0	0	1	2	0	2	1
BW	Kraniopsis	C. alba	1	13	4.90323	4.96774	3.41935	0.987013	1.45283	7	28.5714	0	0	1	0	0	1	2	3	2	1
BW	Kraniopsis	C. alba	1	13	4.3871	4.25806	3.16129	1.0303	1.34694	7	28.5714	0	0	1	0	0	1	2	0	0	1
BW	Kraniopsis	C. alba	1	13	4.90323	4.96774	3.22581	0.987013	1.54	9	33.3333	0	0	1	0	0	1	2	0	0	1
BW	Kraniopsis	C. alba	1	13	4.77419	4.96774	3.03226	0.961039	1.6383	7	14.2857	0	0	1	0	0	1	2	0	0	1
BW	Kraniopsis	C. alba	1	13	4.45161	4.51613	3.35484	0.985714	1.34615	8	37.5	0	0	1	0	0	1	2	3	3	1
BW	Kraniopsis	C. alba	1	13	4.96774	4.90323	3.35484	1.01316	1.46154	7	28.5714	0	0	1	0	0	1	2	3	3	1
BW	Kraniopsis	C. alba	1	13	4.12903	4.90323	3.09677	0.842105	1.58333	7	28.5714	0	0	1	0	0	1	2	3	3	1
BW	Kraniopsis	C. alba	1	13	4.64516	4.3871	3.48387	1.05882	1.25926	8	12.5	0	0	1	0	0	1	2	0	0	1
BW	Kraniopsis	C. alba	1	14	3.16129	4.3871	2.58065	0.720588	1.7	7	28.5714	0	0	1	0	0	0	2	1	2	1
BW	Kraniopsis	C. alba	1	14	3.16129	4.32258	2.90323	0.731343	1.48889	8	50	0	0	1	0	0	0	2	3	2	1
BW	Kraniopsis	C. alba	1	14	3.29032	4.3871	2.90323	0.75	1.51111	8	12.5	0	0	1	0	0	0	2	3	2	1
BW	Kraniopsis	C. alba	1	14	3.35484	4.51613	3.09677	0.742857	1.45833	8	37.5	0	0	1	0	0	0	2	0	2	1
BW	Kraniopsis	C. alba	1	14	3.41935	4.25806	2.70968	0.80303	1.57143	8	25	0	0	1	0	0	0	2	0	2	1
BW	Kraniopsis	C. alba	1	14	4.32258	4.25806	3.09677	1.01515	1.375	8	12.5	0	0	1	0	0	0	2	0	3	1
BW	Kraniopsis	C. alba	1	14	3.16129	4.12903	2.96774	0.765625	1.3913	7	28.5714	0	0	1	0	0	0	2	0	2	1
BW	Kraniopsis	C. alba	1	14	3.54839	4.90323	3.48387	0.723684	1.40741	8	12.5	0	0	1	0	0	0	2	0	2	1
BW	Kraniopsis	C. alba	1	14	4.19355	4.77419	3.35484	0.878378	1.42308	8	50	0	0	1	0	0	0	2	0	2	1
BW	Kraniopsis	C. alba	1	14	3.09677	4.06452	2.83871	0.761905	1.43182	6	83.3333	0	0	1	0	0	0	2	0	2	1
BW	Kraniopsis	C. alba	1	14	3.22581	4.12903	2.90323	0.78125	1.42222	10	30	0	0	1	0	0	0	2	0	2	1
BW	Kraniopsis	C. alba	1	14	3.29032	4.12903	2.90323	0.796875	1.42222	9	22.2222	0	0	1	0	0	0	2	0	2	1
BW	Kraniopsis	C. alba	1	14	3.29032	4.3871	3.09677	0.75	1.41667	8	25	0	0	1	0	0	0	2	0	2	1
BW	Kraniopsis	C. alba	1	14	3.6129	4.83871	3.22581	0.746667	1.5	8	25	0	0	1	0	0	0	2	0	2	1
BW	Kraniopsis	C. alba	1	14	3.09677	3.29032	3.16129	0.941176	1.04082	8	0	0	0	0	0	0	0	0	0	2	1
BW	Kraniopsis	C. alba	1	14	3.29032	4.58065	2.96774	0.71831	1.54348	8	62.5	0	0	1	0	0	0	2	0	2	1
BW	Kraniopsis	C. alba	1	14	4.32258	4.12903	2.96774	1.04688	1.3913	8	25	0	0	1	0	0	0	2	0	2	1
BW	Kraniopsis	C. alba	1	14	3.29032	4.45161	2.83871	0.73913	1.56818	8	12.5	0	0	1	0	0	0	2	0	2	1
BW	Kraniopsis	C. alba	1	14	3.93548	4.06452	2.90323	0.968254	1.4	7	71.4286	0	0	1	0	0	0	2	0	2	1
BW	Kraniopsis	C. alba	1	14	3.74194	4.06452	2.83871	0.920635	1.43182	7	28.5714	0	0	1	0	0	0	2	0	2	1
BW	Kraniopsis	C. alba	1	14	3.22581	4.25806	2.96774	0.757576	1.43478	7	71.4286	0	0	1	0	0	0	2	0	2	1
BW	Kraniopsis	C. alba	1	14	2.90323	4.06452	2.96774	0.714286	1.36957	7	14.2857	0	0	1	0	0	0	2	0	2	1
BW	Kraniopsis	C. alba	1	14	3.29032	4.25806	2.51613	0.772727	1.69231	7	28.5714	0	0	1	0	0	0	2	0	2	1
BW	Kraniopsis	C. alba	1	14	3.48387	4.58065	3.22581	0.760563	1.42	6	66.6667	0	0	1	0	0	0	2	0	2	1
BW	Kraniopsis	C. alba	1	14	4.12903	3.87097	2.90323	1.06667	1.33333	8	12.5	0	0	1	0	0	0	2	0	2	1
BW	Kraniopsis	C. alba	1	14	3.16129	4.19355	2.96774	0.753846	1.41304	9	0	0	0	0	0	0	0	2	0	2	1
BW	Kraniopsis	C. alba	1	14	3.22581	4.32258	2.83871	0.746269	1.52273	9	33.3333	0	0	1	0	0	0	2	0	2	1
BW	Kraniopsis	C. alba	1	14	3.29032	4.51613	3.09677	0.728571	1.45833	8	12.5	0	0	1	0	0	0	2	0	2	1
BW	Kraniopsis	C. alba	1	14	3.09677	4.45161	3.03226	0.695652	1.46809	8	37.5	0	0	1	0	0	0	2	1	2	1
BW	Kraniopsis	C. alba	1	14	4.06452	3.6129	2.83871	1.125	1.27273	8	50	0	0	1	0	0	0	2	0	2	1
BW	Kraniopsis	C. alba	1	15	3.67742	4	2.32258	0.919355	1.72222	7	28.5714	0	0	1	0	0	1	2	0	0	1
BW	Kraniopsis	C. alba	1	15	3.29032	4.25806	2.70968	0.772727	1.57143	8	37.5	0	0	1	0	0	1	2	0	0	1
BW	Kraniopsis	C. alba	1	15	4.06452	4.25806	3.16129	0.954545	1.34694	7	14.2857	0	0	1	0	0	1	2	0	0	1
BW	Kraniopsis	C. alba	1	15	4.45161	4.64516	2.83871	0.958333	1.63636	6	83.3333	0	0	1	0	0	1	2	0	0	1
BW	Kraniopsis	C. alba	1	15	3.6129	3.87097	2.70968	0.933333	1.42857	8	12.5	0	0	1	0	0	1	2	0	0	1
BW	Kraniopsis	C. alba	1	15	4	3.87097	2.64516	1.03333	1.46341	8	25	0	0	1	0	0	1	2	0	0	1
BW	Kraniopsis	C. alba	1	15	4.32258	4.70968	2.70968	0.917808	1.7381	8	0	0	0	0	0	0	1	2	0	0	1
BW	Kraniopsis	C. alba	1	15	3.93548	4.25806	2.58065	0.924242	1.65	8	25	0	0	1	0	0	1	2	0	0	1
BW	Kraniopsis	C. alba	1	15	4.64516	4.32258	2.83871	1.07463	1.52273	8	12.5	0	0	1	0	0	1	2	0	0	1
BW	Kraniopsis	C. alba	1	15	3.93548	4.25806	2.64516	0.924242	1.60976	8	12.5	0	0	1	0	0	1	2	0	0	1
BW	Kraniopsis	C. alba	1	15	3.80645	4.32258	2.3871	0.880597	1.81081	8	12.5	0	0	1	0	0	1	2	0	0	1
BW	Kraniopsis	C. alba	1	15	3.80645	4.3871	2.45161	0.867647	1.78947	7	28.5714	0	0	1	0	0	1	2	0	0	1
BW	Kraniopsis	C. alba	1	15	4	4.25806	2.51613	0.939394	1.69231	7	0	0	0	0	0	0	1	2	0	0	1
BW	Kraniopsis	C. alba	1	15	4.19355	4.19355	2.64516	1	1.58537	7	28.5714	0	0	1	0	0	1	2	0	0	1
BW	Kraniopsis	C. alba	1	15	4.25806	3.87097	2.3871	1.1	1.62162	7	14.2857	0	0	1	0	0	1	2	0	0	1
BW	Kraniopsis	C. alba	1	15	4	4.64516	2.64516	0.861111	1.7561	7	14.2857	0	0	1	0	0	1	2	0	0	1
BW	Kraniopsis	C. alba	1	15	4.64516	4.25806	2.70968	1.09091	1.57143	8	0	0	0	0	0	0	1	2	0	0	1
BW	Kraniopsis	C. alba	1	15	4.3871	4.06452	2.70968	1.07937	1.5	8	12.5	0	0	1	0	0	1	2	0	0	1
BW	Kraniopsis	C. alba	1	15	4.12903	4.70968	2.70968	0.876712	1.7381	8	12.5	0	0	1	0	0	1	2	0	0	1
BW	Kraniopsis	C. alba	1	15	3.6129	4.51613	2.58065	0.8	1.75	8	25	0	0	1	0	0	1	2	0	0	1
BW	Kraniopsis	C. alba	1	15	4.06452	4.3871	2.70968	0.926471	1.61905	6	50	0	0	1	0	0	1	2	0	2	1
BW	Kraniopsis	C. alba	1	15	3.67742	4.32258	2.64516	0.850746	1.63415	7	14.2857	0	0	1	0	0	1	2	0	2	1
BW	Kraniopsis	C. alba	1	15	4.12903	4.3871	2.58065	0.941176	1.7	8	0	0	0	0	0	0	1	2	0	2	1
BW	Kraniopsis	C. alba	1	15	3.80645	4.3871	2.70968	0.867647	1.61905	7	0	0	0	0	0	0	1	2	0	3	1
BW	Kraniopsis	C. alba	1	15	3.93548	4.32258	2.58065	0.910448	1.675	8	37.5	0	0	1	0	0	1	2	0	3	1
BW	Kraniopsis	C. alba	1	15	4.19355	4.45161	2.70968	0.942029	1.64286	6	50	0	0	1	0	0	1	2	0	3	1
BW	Kraniopsis	C. alba	1	15	3.74194	4.25806	2.51613	0.878788	1.69231	8	37.5	0	0	1	0	0	1	2	0	0	1
BW	Kraniopsis	C. alba	1	15	4.90323	3.87097	2.70968	1.26667	1.42857	7	42.8571	0	0	1	0	0	1	2	0	0	1
BW	Kraniopsis	C. alba	1	15	4.45161	4	2.64516	1.1129	1.5122	7	42.8571	0	0	1	0	0	1	2	0	0	1
BW	Kraniopsis	C. alba	1	15	3.93548	3.93548	2.58065	1	1.525	8	25	0	0	1	0	0	1	2	0	0	1
BW	Mesomora	C. alternifolia	2	1	5.22581	6.3871	5.41935	0.818182	1.17857	8	100	3.35484	3.54839	1	1	0	0	1	3	2	0
BW	Mesomora	C. alternifolia	2	1	5.35484	6.06452	5.29032	0.882979	1.14634	7	100	3.29032	3.74194	1	1	0	0	1	3	2	0
BW	Mesomora	C. alternifolia	2	1	4.51613	5.67742	4.51613	0.795455	1.25714	8	100	4	3.41935	1	1	0	0	1	3	2	0
BW	Mesomora	C. alternifolia	2	1	5.03226	6.19355	5.67742	0.8125	1.09091	8	87.5	3.22581	4.06452	1	1	0	0	0	3	2	0
BW	Mesomora	C. alternifolia	2	1	4.96774	5.80645	4.51613	0.855556	1.28571	8	75	3.74194	3.6129	1	1	0	0	1	3	2	0
BW	Mesomora	C. alternifolia	2	2	5.22581	5.16129	4.25806	1.0125	1.21212	9	77.7778	2.58065	3.03226	1	1	0	0	1	3	0	0
BW	Mesomora	C. alternifolia	2	2	5.22581	5.41935	4.51613	0.964286	1.2	7	71.4286	2.83871	2.70968	1	1	0	0	1	3	2	0
BW	Mesomora	C. alternifolia	2	2	5.6129	5.48387	4.64516	1.02353	1.18056	9	88.8889	3.22581	3.09677	1	1	0	0	1	3	3	0
BW	Mesomora	C. alternifolia	2	2	5.09677	5.03226	4.83871	1.01282	1.04	8	75	3.22581	3.22581	1	1	0	0	0	3	2	0
BW	Mesomora	C. alternifolia	2	2	5.03226	5.09677	4.06452	0.987342	1.25397	6	100	2.96774	2.90323	1	1	0	0	1	3	3	0
BW	Mesomora	C. alternifolia	2	3	5.74194	6.25806	4.96774	0.917526	1.25974	7	100	3.6129	3.6129	1	1	0	0	1	3	2	0
BW	Mesomora	C. alternifolia	2	3	5.80645	6.06452	5.16129	0.957447	1.175	7	100	3.22581	3.48387	1	1	0	0	1	3	2	0
BW	Mesomora	C. alternifolia	2	4	5.54839	5.6129	5.09677	0.988506	1.10127	6	100	2.90323	3.16129	1	1	0	0	0	3	2	0
BW	Mesomora	C. alternifolia	2	4	5.93548	5.87097	5.09677	1.01099	1.1519	8	100	3.22581	3.29032	1	1	0	0	0	3	2	0
BW	Mesomora	C. alternifolia	2	4	5.54839	5.67742	4.77419	0.977273	1.18919	8	87.5	2.90323	3.41935	1	1	0	0	1	3	2	0
BW	Mesomora	C. alternifolia	2	5	4.58065	5.35484	5.09677	0.855422	1.05063	7	100	2.90323	3.09677	1	1	0	0	0	3	2	0
BW	Mesomora	C. alternifolia	2	5	4.70968	5.74194	4.77419	0.820225	1.2027	7	100	3.48387	3.48387	1	1	0	0	1	3	2	0
BW	Mesomora	C. alternifolia	2	5	5.6129	6.06452	4.90323	0.925532	1.23684	7	100	3.22581	3.6129	1	1	0	0	1	3	2	0
BW	Mesomora	C. alternifolia	2	5	4.96774	5.48387	4.64516	0.905882	1.18056	8	100	3.41935	3.29032	1	1	0	0	1	3	2	0
BW	Mesomora	C. alternifolia	2	5	5.09677	5.48387	4.45161	0.929412	1.23188	8	100	2.90323	3.16129	1	1	0	0	1	3	2	0
BW	Mesomora	C. alternifolia	2	6	5.74194	5.87097	4.58065	0.978022	1.28169	8	100	2.90323	2.90323	1	1	0	0	1	3	2	0
BW	Mesomora	C. alternifolia	2	6	6.19355	6.06452	4.96774	1.02128	1.22078	8	100	3.03226	3.80645	1	1	0	0	1	3	2	0
BW	Mesomora	C. alternifolia	2	6	6.12903	5.93548	5.35484	1.03261	1.10843	8	100	2.90323	3.09677	1	1	0	0	1	3	2	0
BW	Mesomora	C. alternifolia	2	6	5.87097	5.87097	5.29032	1	1.10976	7	100	2.83871	2.83871	1	1	0	0	0	3	2	0
BW	Mesomora	C. alternifolia	2	6	5.80645	5.87097	5.35484	0.989011	1.09639	8	100	2.77419	3.16129	1	1	0	0	0	3	2	0
BW	Mesomora	C. alternifolia	2	6	5.29032	5.41935	4.32258	0.97619	1.25373	8	100	1.6129	2.58065	1	1	0	0	1	3	2	0
BW	Mesomora	C. alternifolia	2	6	6	5.80645	4.45161	1.03333	1.30435	7	100	2.58065	2.58065	1	1	0	0	1	3	2	0
BW	Mesomora	C. alternifolia	2	6	6.19355	6.19355	5.29032	1	1.17073	8	100	2.58065	2.90323	1	1	0	0	0	3	2	0
BW	Mesomora	C. alternifolia	2	6	5.93548	5.41935	4.32258	1.09524	1.25373	8	100	2.45161	2.77419	1	1	0	0	1	3	2	0
BW	Mesomora	C. alternifolia	2	6	5.93548	5.29032	4.77419	1.12195	1.10811	8	100	2.25806	2.83871	1	1	0	0	0	3	2	0
BW	Mesomora	C. alternifolia	2	11	5.74194	5.74194	4.3871	1	1.30882	8	87.5	2.70588	3.33333	1	1	0	0	2	3	2	0
BW	Mesomora	C. alternifolia	2	11	5.09677	5.54839	4.70968	0.918605	1.17808	8	75	2.15686	3.09804	1	1	0	0	2	3	2	0
BW	Mesomora	C. alternifolia	2	11	5.22581	5.67742	4.45161	0.920455	1.27536	9	88.8889	3.29412	2.70588	1	1	0	0	2	3	2	0
BW	Mesomora	C. alternifolia	2	11	5.29032	5.87097	5.22581	0.901099	1.12346	7	100	2.62745	3.52941	1	1	0	0	1	3	2	0
BW	Mesomora	C. alternifolia	2	11	4.83871	5.80645	4.45161	0.833333	1.30435	7	100	2.54902	2.70588	1	1	0	0	2	3	2	0
BW	Mesomora	C. alternifolia	2	11	5.35484	5.67742	4.77419	0.943182	1.18919	8	87.5	3.29412	2.27451	1	1	0	0	2	3	2	0
BW	Mesomora	C. alternifolia	2	11	5.03226	5.93548	4.58065	0.847826	1.29577	8	75	2.54902	3.33333	1	1	0	0	2	3	2	0
BW	Mesomora	C. alternifolia	2	11	4.90323	5.74194	4.77419	0.853933	1.2027	8	62.5	3.33333	3.52941	1	1	0	0	2	3	2	0
BW	Mesomora	C. alternifolia	2	11	5.35484	5.74194	4.70968	0.932584	1.21918	7	71.4286	2.7451	2.98039	1	1	0	0	2	3	2	0
BW	Mesomora	C. alternifolia	2	11	4.96774	5.67742	4.58065	0.875	1.23944	8	75	2.82353	3.45098	1	1	0	0	2	3	2	0
BW	Mesomora	C. alternifolia	2	11	5.67742	5.93548	5.16129	0.956522	1.15	8	100	2.54902	3.4902	1	1	0	0	1	3	2	0
BW	Mesomora	C. alternifolia	2	11	5.6129	6.32258	5.80645	0.887755	1.08889	8	75	2.58824	4.19608	1	1	0	0	0	3	2	0
BW	Mesomora	C. alternifolia	2	11	5.67742	5.6129	4.64516	1.01149	1.20833	8	62.5	3.13725	3.29412	1	1	0	0	2	3	2	0
BW	Mesomora	C. alternifolia	2	11	4.77419	5.87097	4.70968	0.813187	1.24658	7	100	3.29412	3.33333	1	1	0	0	2	3	2	0
BW	Mesomora	C. alternifolia	2	11	5.67742	6.12903	5.54839	0.926316	1.10465	8	75	2.7451	3.37255	1	1	0	0	0	3	2	0
BW	Mesomora	C. alternifolia	2	11	5.48387	5.93548	5.48387	0.923913	1.08235	7	100	2.35294	4	1	1	0	0	0	3	2	0
BW	Mesomora	C. alternifolia	2	11	5.22581	5.93548	5.41935	0.880435	1.09524	8	75	3.33333	3.41176	1	1	0	0	0	3	2	0
BW	Mesomora	C. alternifolia	2	11	4.64516	5.41935	4.3871	0.857143	1.23529	8	100	2.90196	3.01961	1	1	0	0	2	3	2	0
BW	Mesomora	C. alternifolia	2	11	5.29032	5.93548	4.51613	0.891304	1.31429	8	50	1.88235	3.21569	1	1	0	0	2	3	2	0
BW	Mesomora	C. alternifolia	2	11	4.90323	5.67742	4.58065	0.863636	1.23944	8	12.5	2.94118	2.54902	1	1	0	0	2	3	2	0
BW	Mesomora	C. alternifolia	2	11	4.96774	5.87097	4.96774	0.846154	1.18182	8	62.5	2.27451	3.33333	1	1	0	0	1	3	2	0
BW	Mesomora	C. alternifolia	2	11	4.64516	5.41935	4.45161	0.857143	1.21739	8	75	2.62745	3.13725	1	1	0	0	2	3	2	0
BW	Mesomora	C. alternifolia	2	11	4.96774	5.48387	5.16129	0.905882	1.0625	8	75	2.94118	3.21569	1	1	0	0	0	3	2	0
BW	Mesomora	C. alternifolia	2	11	4.70968	5.29032	5.16129	0.890244	1.025	8	75	2.86275	3.52941	1	1	0	0	0	3	3	0
BW	Mesomora	C. alternifolia	2	11	4.83871	5.29032	4.19355	0.914634	1.26154	9	88.8889	2.62745	2.94118	1	1	0	0	2	3	3	0
BW	Mesomora	C. alternifolia	2	11	4.83871	5.41935	4.32258	0.892857	1.25373	7	85.7143	2.15686	2.7451	1	1	0	0	2	3	3	0
BW	Mesomora	C. alternifolia	2	11	5.6129	6.06452	5.29032	0.925532	1.14634	8	75	2.19608	3.33333	1	1	0	0	0	3	3	0
BW	Mesomora	C. alternifolia	2	11	5.16129	5.6129	4.3871	0.91954	1.27941	8	100	2.86275	3.01961	1	1	0	0	2	3	3	0
BW	Mesomora	C. alternifolia	2	11	4.83871	5.22581	4.32258	0.925926	1.20896	8	100	2.35294	2.7451	1	1	0	0	1	3	2	0
BW	Mesomora	C. alternifolia	2	11	4.96774	5.67742	4.45161	0.875	1.27536	8	75	2.7451	3.01961	1	1	0	0	2	3	2	0
BW	Mesomora	C. alternifolia	2	12	4.96774	5.22581	4.19355	0.950617	1.24615	8	12.5	2.35294	2.58824	1	1	0	0	1	3	2	0
BW	Mesomora	C. alternifolia	2	12	6	5.54839	5.29032	1.0814	1.04878	6	50	2.11765	3.4902	1	1	0	0	0	3	2	0
BW	Mesomora	C. alternifolia	2	12	5.03226	5.16129	4.3871	0.975	1.17647	8	87.5	2.98039	2.7451	1	1	0	0	1	3	2	0
BW	Mesomora	C. alternifolia	2	12	5.35484	5.41935	4.3871	0.988095	1.23529	8	25	3.21569	2.78431	1	1	0	0	1	3	2	0
BW	Mesomora	C. alternifolia	2	12	5.54839	5.35484	4.51613	1.03614	1.18571	8	50	1.96078	2.07843	1	1	0	0	1	3	2	0
BW	Mesomora	C. alternifolia	2	12	5.03226	5.35484	4.32258	0.939759	1.23881	7	57.1429	2.70588	3.05882	1	1	0	0	1	3	2	0
BW	Mesomora	C. alternifolia	2	12	5.22581	5.16129	4.25806	1.0125	1.21212	8	62.5	1.72549	1.33333	1	1	0	0	1	3	2	0
BW	Mesomora	C. alternifolia	2	12	5.09677	4.70968	4.19355	1.08219	1.12308	8	25	2.11765	2.47059	1	1	0	0	1	3	2	0
BW	Mesomora	C. alternifolia	2	12	5.22581	5.16129	4.3871	1.0125	1.17647	8	50	2.66667	3.01961	1	1	0	0	1	3	2	0
BW	Mesomora	C. alternifolia	2	12	5.09677	5.35484	4.83871	0.951807	1.10667	9	44.4444	2.7451	2.66667	1	1	0	0	0	3	2	0
BW	Mesomora	C. alternifolia	2	12	5.22581	5.22581	4.12903	1	1.26562	8	25	2.62745	2.70588	1	1	0	0	1	3	2	0
BW	Mesomora	C. alternifolia	2	12	4.90323	4.70968	4.19355	1.0411	1.12308	8	25	2.47059	2.27451	1	1	0	0	1	3	2	0
BW	Mesomora	C. alternifolia	2	12	5.54839	5.35484	5.29032	1.03614	1.0122	8	0	1.88235	3.21569	0	1	0	0	0	3	2	0
BW	Mesomora	C. alternifolia	2	12	5.16129	5.16129	4.19355	1	1.23077	8	50	2.15686	2.90196	1	1	0	0	1	3	2	0
BW	Mesomora	C. alternifolia	2	12	5.48387	5.22581	4.3871	1.04938	1.19118	8	12.5	2.70588	2.43137	1	1	0	0	1	3	2	0
BW	Mesomora	C. alternifolia	2	12	5.22581	5.41935	4.96774	0.964286	1.09091	7	42.8571	1.76471	2.47059	1	1	0	0	0	3	2	0
BW	Mesomora	C. alternifolia	2	12	5.22581	5.03226	4.19355	1.03846	1.2	8	50	1.76471	2.66667	1	1	0	0	1	3	2	0
BW	Mesomora	C. alternifolia	2	12	5.35484	5.03226	4.25806	1.0641	1.18182	8	50	2.19608	2.62745	1	1	0	0	1	3	2	0
BW	Mesomora	C. alternifolia	2	12	4.96774	5.16129	4.25806	0.9625	1.21212	8	37.5	2.19608	2.62745	1	1	0	0	1	3	2	0
BW	Mesomora	C. alternifolia	2	12	6.06452	5.41935	4.51613	1.11905	1.2	8	25	3.17647	2.58824	1	1	0	0	1	3	2	0
BW	Mesomora	C. alternifolia	2	12	5.16129	5.22581	4.32258	0.987654	1.20896	7	85.7143	2.66667	2.86275	1	1	0	0	1	3	2	0
BW	Mesomora	C. alternifolia	2	12	4.70968	4.96774	4.06452	0.948052	1.22222	7	71.4286	2.15686	2.94118	1	1	0	0	1	3	2	0
BW	Mesomora	C. alternifolia	2	12	6.70968	5.35484	5.03226	1.25301	1.0641	8	25	1.80392	2.27451	1	1	0	0	0	3	2	0
BW	Mesomora	C. alternifolia	2	12	5.16129	4.96774	4.25806	1.03896	1.16667	7	42.8571	2.54902	2.54902	1	1	0	0	0	3	2	0
BW	Mesomora	C. alternifolia	2	12	5.29032	4.77419	3.87097	1.10811	1.23333	7	28.5714	1.88235	2.35294	1	1	0	0	1	3	2	0
BW	Mesomora	C. alternifolia	2	12	5.09677	4.96774	4.19355	1.02597	1.18462	8	75	2.15686	2.62745	1	1	0	0	1	3	2	0
BW	Mesomora	C. alternifolia	2	12	5.48387	5.22581	4.32258	1.04938	1.20896	8	50	2.19608	2.98039	1	1	0	0	1	3	2	0
BW	Mesomora	C. alternifolia	2	12	5.09677	5.22581	4.19355	0.975309	1.24615	8	50	2.54902	2.58824	1	1	0	0	1	3	2	0
BW	Mesomora	C. alternifolia	2	12	5.48387	5.29032	4.45161	1.03659	1.18841	7	42.8571	3.29412	2.66667	1	1	0	0	1	3	2	0
BW	Mesomora	C. alternifolia	2	12	5.41935	5.29032	4.51613	1.02439	1.17143	8	62.5	1.45098	1.60784	1	1	0	0	1	3	2	0
BW	Mesomora	C. alternifolia	2	13	4.83871	5.29032	4.51613	0.914634	1.17143	7	71.4286	3.21569	3.33333	1	1	0	0	1	3	2	0
BW	Mesomora	C. alternifolia	2	13	5.29032	5.29032	5.22581	1	1.01235	7	100	3.60784	3.80392	1	1	0	0	0	3	2	0
BW	Mesomora	C. alternifolia	2	13	5.29032	5.22581	4.70968	1.01235	1.10959	7	100	3.60784	4	1	1	0	0	0	3	2	0
BW	Mesomora	C. alternifolia	2	13	5.16129	5.48387	5.03226	0.941176	1.08974	8	100	3.45098	4	1	1	0	0	0	3	2	0
BW	Mesomora	C. alternifolia	2	13	5.6129	5.54839	4.58065	1.01163	1.21127	8	87.5	4	3.84314	1	1	0	0	1	3	2	0
BW	Mesomora	C. alternifolia	2	13	5.6129	5.29032	5.03226	1.06098	1.05128	8	87.5	3.52941	3.60784	1	1	0	0	0	3	2	0
BW	Mesomora	C. alternifolia	2	13	5.16129	5.80645	5.67742	0.888889	1.02273	9	55.5556	3.92157	4.23529	1	1	0	0	0	3	2	0
BW	Mesomora	C. alternifolia	2	13	5.6129	5.48387	4.70968	1.02353	1.16438	8	75	2.7451	4.03922	1	1	0	0	1	3	2	0
BW	Mesomora	C. alternifolia	2	13	4.96774	6.06452	5.29032	0.819149	1.14634	9	88.8889	4.19608	4.03922	1	1	0	0	1	3	2	0
BW	Mesomora	C. alternifolia	2	13	5.29032	5.09677	5.22581	1.03797	0.975309	8	75	2.58824	4.03922	1	1	0	0	0	3	2	0
BW	Mesomora	C. alternifolia	2	13	5.22581	5.35484	4.77419	0.975904	1.12162	8	75	3.92157	3.92157	1	1	0	0	0	3	2	0
BW	Mesomora	C. alternifolia	2	13	4.90323	5.48387	4.83871	0.894118	1.13333	8	62.5	3.33333	4.03922	1	1	0	0	0	3	2	0
BW	Mesomora	C. alternifolia	2	13	5.22581	5.54839	5.16129	0.94186	1.075	8	75	4	3.33333	1	1	0	0	0	3	2	0
BW	Mesomora	C. alternifolia	2	13	5.29032	5.09677	4.83871	1.03797	1.05333	9	100	3.60784	3.37255	1	1	0	0	0	3	2	0
BW	Mesomora	C. alternifolia	2	13	4.83871	5.87097	5.09677	0.824176	1.1519	6	83.3333	3.92157	3.72549	1	1	0	0	1	3	2	0
BW	Mesomora	C. alternifolia	2	13	4.96774	5.35484	4.58065	0.927711	1.16901	7	85.7143	3.33333	3.52941	1	1	0	0	1	3	2	0
BW	Mesomora	C. alternifolia	2	13	5.22581	5.87097	5.29032	0.89011	1.10976	8	25	3.80392	4.03922	1	1	0	0	1	3	2	0
BW	Mesomora	C. alternifolia	2	13	5.6129	5.74194	5.22581	0.977528	1.09877	8	87.5	3.80392	4.15686	1	1	0	0	0	3	2	0
BW	Mesomora	C. alternifolia	2	13	5.09677	5.67742	4.77419	0.897727	1.18919	7	85.7143	4.07843	4.11765	1	1	0	0	1	3	2	0
BW	Mesomora	C. alternifolia	2	13	5.03226	5.16129	4.96774	0.975	1.03896	8	50	3.84314	4	1	1	0	0	0	3	2	0
BW	Mesomora	C. alternifolia	2	13	5.22581	5.48387	5.54839	0.952941	0.988372	8	37.5	3.92157	4.19608	1	1	0	0	0	3	2	0
BW	Mesomora	C. alternifolia	2	13	5.67742	5.93548	4.96774	0.956522	1.19481	8	100	4.39216	4.07843	1	1	0	0	1	3	2	0
BW	Mesomora	C. alternifolia	2	13	4.96774	5.35484	4.70968	0.927711	1.13699	8	100	3.84314	3.52941	1	1	0	0	0	3	2	0
BW	Mesomora	C. alternifolia	2	13	4.83871	5.54839	5.16129	0.872093	1.075	7	85.7143	2.94118	3.60784	1	1	0	0	0	3	2	0
BW	Mesomora	C. alternifolia	2	13	5.22581	5.48387	5.09677	0.952941	1.07595	8	75	4.07843	3.60784	1	1	0	0	0	3	2	0
BW	Mesomora	C. alternifolia	2	13	5.74194	5.87097	5.09677	0.978022	1.1519	7	100	3.52941	4.07843	1	1	0	0	1	3	2	0
BW	Mesomora	C. alternifolia	2	13	5.22581	5.35484	4.70968	0.975904	1.13699	8	100	3.96078	4.27451	1	1	0	0	0	3	2	0
BW	Mesomora	C. alternifolia	2	13	4.70968	5.74194	4.77419	0.820225	1.2027	8	75	3.92157	3.80392	1	1	0	0	1	3	2	0
BW	Mesomora	C. alternifolia	2	13	4.90323	5.54839	5.09677	0.883721	1.08861	8	75	4.31373	4.19608	1	1	0	0	0	3	2	0
BW	Mesomora	C. alternifolia	2	13	5.54839	5.67742	5.16129	0.977273	1.1	8	87.5	4.39216	4.31373	1	1	0	0	0	3	2	0
BW	Mesomora	C. alternifolia	2	14	6.64516	5.6129	4.83871	1.18391	1.16	8	50	2.7451	3.17647	1	1	0	0	1	3	3	0
BW	Mesomora	C. alternifolia	2	14	5.87097	5.29032	4.51613	1.10976	1.17143	7	57.1429	2.66667	2.78431	1	1	0	0	0	3	3	0
BW	Mesomora	C. alternifolia	2	14	6.32258	5.48387	4.58065	1.15294	1.19718	8	75	2.27451	2.7451	1	1	0	0	1	3	3	0
BW	Mesomora	C. alternifolia	2	14	5.93548	5.09677	4.77419	1.16456	1.06757	8	12.5	2.7451	3.13725	1	1	0	0	1	3	3	0
BW	Mesomora	C. alternifolia	2	14	5.80645	5.41935	4.77419	1.07143	1.13514	6	66.6667	3.13725	2.94118	1	1	0	0	0	3	3	0
BW	Mesomora	C. alternifolia	2	14	5.87097	5.48387	4.58065	1.07059	1.19718	8	75	3.01961	3.09804	1	1	0	0	0	3	3	0
BW	Mesomora	C. alternifolia	2	14	6	6.06452	4.77419	0.989362	1.27027	6	66.6667	2.7451	3.21569	1	1	0	0	1	3	3	0
BW	Mesomora	C. alternifolia	2	14	6.06452	5.48387	4.64516	1.10588	1.18056	8	62.5	2.7451	2.94118	1	1	0	0	0	3	3	0
BW	Mesomora	C. alternifolia	2	14	5.93548	5.41935	4.45161	1.09524	1.21739	7	57.1429	2.7451	3.13725	1	1	0	0	0	3	3	0
BW	Mesomora	C. alternifolia	2	14	6.45161	5.74194	4.96774	1.1236	1.15584	8	50	2.7451	3.4902	1	1	0	0	1	3	3	0
BW	Mesomora	C. alternifolia	2	14	6.25806	5.48387	4.58065	1.14118	1.19718	8	62.5	2.66667	3.37255	1	1	0	0	0	3	3	0
BW	Mesomora	C. alternifolia	2	14	6.45161	5.6129	4.70968	1.14943	1.19178	8	62.5	2.54902	3.2549	1	1	0	0	0	3	3	0
BW	Mesomora	C. alternifolia	2	14	5.93548	5.54839	4.51613	1.06977	1.22857	8	37.5	2.19608	3.33333	1	1	0	0	1	3	2	0
BW	Mesomora	C. alternifolia	2	14	6.19355	5.41935	4.83871	1.14286	1.12	8	50	2.7451	3.64706	1	1	0	0	0	3	2	0
BW	Mesomora	C. alternifolia	2	14	5.80645	5.16129	4.3871	1.125	1.17647	8	75	2.15686	2.94118	1	1	0	0	0	3	2	0
BW	Mesomora	C. alternifolia	2	14	6.64516	5.48387	4.83871	1.21176	1.13333	8	50	2.94118	3.4902	1	1	0	0	0	3	2	0
BW	Mesomora	C. alternifolia	2	14	6.19355	5.74194	4.64516	1.07865	1.23611	7	71.4286	2.54902	3.13725	1	1	0	0	0	3	2	0
BW	Mesomora	C. alternifolia	2	14	6.51613	5.6129	5.48387	1.16092	1.02353	8	75	2.43137	3.01961	1	1	0	0	0	3	2	0
BW	Mesomora	C. alternifolia	2	14	6.12903	5.87097	4.83871	1.04396	1.21333	8	75	2.94118	3.17647	1	1	0	0	1	3	2	0
BW	Mesomora	C. alternifolia	2	14	6.51613	5.93548	4.90323	1.09783	1.21053	8	50	2.39216	3.33333	1	1	0	0	1	3	2	0
BW	Mesomora	C. alternifolia	2	14	5.87097	5.16129	4.32258	1.1375	1.19403	8	62.5	2.39216	2.66667	1	1	0	0	1	3	2	0
BW	Mesomora	C. alternifolia	2	14	6.12903	5.6129	4.83871	1.09195	1.16	7	57.1429	3.13725	3.33333	1	1	0	0	1	3	2	0
BW	Mesomora	C. alternifolia	2	14	5.67742	5.22581	4.19355	1.08642	1.24615	8	62.5	2.39216	2.94118	1	1	0	0	1	3	2	0
BW	Mesomora	C. alternifolia	2	14	5.80645	5.54839	4.51613	1.04651	1.22857	7	100	3.52941	2.82353	1	1	0	0	1	3	2	0
BW	Mesomora	C. alternifolia	2	14	6.12903	5.54839	4.64516	1.10465	1.19444	7	57.1429	2.66667	3.33333	1	1	0	0	1	3	2	0
BW	Mesomora	C. alternifolia	2	14	5.80645	5.29032	4.58065	1.09756	1.15493	7	71.4286	2.7451	2.98039	1	1	0	0	0	3	2	0
BW	Mesomora	C. alternifolia	2	14	6.25806	5.29032	4.70968	1.18293	1.12329	8	75	2.70588	2.94118	1	1	0	0	1	3	2	0
BW	Mesomora	C. alternifolia	2	14	5.35484	4.58065	4.19355	1.16901	1.09231	7	71.4286	2.03922	2.70588	1	1	0	0	0	3	2	0
BW	Mesomora	C. alternifolia	2	14	5.93548	5.54839	4.64516	1.06977	1.19444	7	71.4286	2.43137	2.7451	1	1	0	0	1	3	3	0
BW	Mesomora	C. alternifolia	2	14	5.93548	5.6129	4.64516	1.05747	1.20833	7	71.4286	2.7451	2.86275	1	1	0	0	1	3	3	0
BW	Mesomora	C. alternifolia	2	15	4.90323	5.48387	4.58065	0.894118	1.19718	8	62.5	3.13725	3.52941	1	1	0	0	1	3	2	0
BW	Mesomora	C. alternifolia	2	15	5.48387	6.51613	5.35484	0.841584	1.21687	10	30	4.31373	3.84314	1	1	0	0	1	3	2	0
BW	Mesomora	C. alternifolia	2	15	5.41935	5.80645	4.64516	0.933333	1.25	7	28.5714	3.13725	3.33333	1	1	0	0	1	3	2	0
BW	Mesomora	C. alternifolia	2	15	5.48387	6	4.77419	0.913978	1.25676	8	50	3.64706	3.45098	1	1	0	0	1	3	2	0
BW	Mesomora	C. alternifolia	2	15	5.09677	5.80645	4.64516	0.877778	1.25	8	50	3.52941	3.21569	1	1	0	0	1	3	2	0
BW	Mesomora	C. alternifolia	2	15	5.16129	5.22581	4.19355	0.987654	1.24615	8	50	2.35294	2.62745	1	1	0	0	1	3	2	0
BW	Mesomora	C. alternifolia	2	15	5.48387	6.19355	5.54839	0.885417	1.11628	7	42.8571	3.84314	3.80392	1	1	0	0	0	3	2	0
BW	Mesomora	C. alternifolia	2	15	4.51613	5.35484	4.58065	0.843373	1.16901	9	66.6667	3.01961	3.33333	1	1	0	0	0	3	2	0
BW	Mesomora	C. alternifolia	2	15	5.29032	5.48387	4.70968	0.964706	1.16438	7	71.4286	3.37255	3.09804	1	1	0	0	0	3	2	0
BW	Mesomora	C. alternifolia	2	15	5.29032	5.87097	4.77419	0.901099	1.22973	7	42.8571	3.64706	2.82353	1	1	0	0	1	3	2	0
BW	Mesomora	C. alternifolia	2	15	5.80645	6.32258	5.74194	0.918367	1.10112	7	28.5714	3.72549	3.84314	1	1	0	0	0	3	2	0
BW	Mesomora	C. alternifolia	2	15	5.54839	6	4.83871	0.924731	1.24	8	37.5	3.76471	3.4902	1	1	0	0	1	3	2	0
BW	Mesomora	C. alternifolia	2	15	5.03226	5.80645	4.77419	0.866667	1.21622	7	57.1429	4.19608	2.7451	1	1	0	0	1	3	2	0
BW	Mesomora	C. alternifolia	2	15	5.22581	5.74194	4.70968	0.910112	1.21918	8	75	3.72549	2.82353	1	1	0	0	1	3	2	0
BW	Mesomora	C. alternifolia	2	15	5.35484	5.74194	4.58065	0.932584	1.25352	8	37.5	2.86275	2.82353	1	1	0	0	1	3	2	0
BW	Mesomora	C. alternifolia	2	15	5.35484	5.87097	4.51613	0.912088	1.3	8	37.5	3.33333	3.60784	1	1	0	0	1	3	2	0
BW	Mesomora	C. alternifolia	2	15	5.35484	6	4.70968	0.892473	1.27397	8	25	3.37255	3.52941	1	1	0	0	1	3	2	0
BW	Mesomora	C. alternifolia	2	15	4.90323	5.87097	4.77419	0.835165	1.22973	7	42.8571	2.7451	2.82353	1	1	0	0	1	3	2	0
BW	Mesomora	C. alternifolia	2	15	4.51613	6.06452	4.83871	0.744681	1.25333	8	37.5	3.92157	3.41176	1	1	0	0	1	3	2	0
BW	Mesomora	C. alternifolia	2	15	5.48387	5.87097	4.96774	0.934066	1.18182	8	62.5	3.21569	3.37255	1	1	0	0	1	3	2	0
BW	Mesomora	C. alternifolia	2	15	5.35484	6.19355	4.77419	0.864583	1.2973	7	28.5714	3.41176	3.45098	1	1	0	0	1	3	2	0
BW	Mesomora	C. alternifolia	2	15	5.41935	5.6129	4.64516	0.965517	1.20833	7	28.5714	2.31373	3.2549	1	1	0	0	1	3	2	0
BW	Mesomora	C. alternifolia	2	15	5.41935	5.80645	4.77419	0.933333	1.21622	8	25	2.7451	3.13725	1	1	0	0	0	3	2	0
BW	Mesomora	C. alternifolia	2	15	5.48387	5.67742	4.64516	0.965909	1.22222	8	75	3.13725	3.17647	1	1	0	0	1	3	2	0
BW	Mesomora	C. alternifolia	2	15	5.6129	5.54839	4.96774	1.01163	1.11688	8	75	3.09804	3.09804	1	1	0	0	0	3	2	0
BW	Mesomora	C. alternifolia	2	15	4.90323	5.54839	4.45161	0.883721	1.24638	8	62.5	2.98039	3.13725	1	1	0	0	1	3	2	0
BW	Mesomora	C. alternifolia	2	15	5.09677	5.6129	4.70968	0.908046	1.19178	8	50	2.94118	3.01961	1	1	0	0	0	3	2	0
BW	Mesomora	C. alternifolia	2	15	5.35484	5.93548	4.83871	0.902174	1.22667	8	37.5	3.33333	3.13725	1	1	0	0	1	3	2	0
BW	Mesomora	C. alternifolia	2	15	5.6129	5.93548	4.70968	0.945652	1.26027	7	85.7143	3.52941	3.33333	1	1	0	0	1	3	2	0
BW	Mesomora	C. alternifolia	2	15	5.22581	5.54839	4.90323	0.94186	1.13158	8	75	3.01961	2.86275	1	1	0	0	1	3	2	0
BW	Mesomora	C. alternifolia	2	16	5.67742	5.48387	4.51613	1.03529	1.21429	8	100	2.86275	3.21569	1	1	0	0	1	3	2	0
BW	Mesomora	C. alternifolia	2	16	6.06452	6.3871	5.22581	0.949495	1.22222	8	25	2.62745	3.33333	1	1	0	0	1	3	2	0
BW	Mesomora	C. alternifolia	2	16	5.80645	5.93548	4.32258	0.978261	1.37313	8	50	2.7451	3.13725	1	1	0	0	1	3	2	0
BW	Mesomora	C. alternifolia	2	16	5.6129	5.6129	4.32258	1	1.29851	7	57.1429	2.82353	2.98039	1	1	0	0	1	3	2	0
BW	Mesomora	C. alternifolia	2	16	5.6129	5.6129	4.32258	1	1.29851	8	50	2.39216	2.7451	1	1	0	0	1	3	2	0
BW	Mesomora	C. alternifolia	2	16	5.03226	4.83871	3.74194	1.04	1.2931	8	12.5	2.23529	1.76471	1	1	0	0	1	3	2	0
BW	Mesomora	C. alternifolia	2	16	5.03226	4.51613	3.6129	1.11429	1.25	8	25	2	2.07843	1	1	0	0	1	3	2	0
BW	Mesomora	C. alternifolia	2	16	5.41935	5.16129	4.06452	1.05	1.26984	8	12.5	2.54902	2.15686	1	1	0	0	1	3	2	0
BW	Mesomora	C. alternifolia	2	16	5.22581	4.70968	3.74194	1.10959	1.25862	7	14.2857	2.5098	2.15686	1	1	0	0	1	3	3	0
BW	Mesomora	C. alternifolia	2	16	5.29032	4.70968	3.93548	1.12329	1.19672	8	37.5	1.96078	1.96078	1	1	0	0	1	3	3	0
BW	Kraniopsis	C. amomum	3	1	6.3871	6.25806	4.58065	1.02062	1.3662	8	75	0	0	1	0	1	0	2	1	2	2
BW	Kraniopsis	C. amomum	3	1	6.25806	6.32258	5.48387	0.989796	1.15294	8	75	0	0	1	0	1	0	2	1	2	2
BW	Kraniopsis	C. amomum	3	1	5.87097	6.64516	5.22581	0.883495	1.2716	8	87.5	0	0	1	0	1	0	2	0	2	2
BW	Kraniopsis	C. amomum	3	1	5.87097	6	4.96774	0.978495	1.20779	8	87.5	0	0	1	0	1	0	2	0	2	2
BW	Kraniopsis	C. amomum	3	1	5.35484	6.25806	5.16129	0.85567	1.2125	8	75	0	0	1	0	1	0	2	0	2	2
BW	Kraniopsis	C. amomum	3	2	5.22581	4.51613	4.32258	1.15714	1.04478	5	60	0	0	1	0	1	0	0	0	3	2
BW	Kraniopsis	C. amomum	3	2	5.41935	4.3871	4.70968	1.23529	0.931507	6	100	0	0	1	0	1	0	0	0	3	2
BW	Kraniopsis	C. amomum	3	2	5.09677	4.32258	4.45161	1.1791	0.971014	7	100	0	0	1	0	1	0	0	0	3	2
BW	Kraniopsis	C. amomum	3	2	5.03226	4.83871	4.45161	1.04	1.08696	7	100	0	0	1	0	1	0	0	0	3	2
BW	Kraniopsis	C. amomum	3	2	4.77419	4.51613	4.45161	1.05714	1.01449	7	100	0	0	1	0	1	0	0	0	3	2
BW	Kraniopsis	C. amomum	3	3	4.96774	5.03226	4.45161	0.987179	1.13043	7	100	0	0	1	0	1	0	1	1	2	2
BW	Kraniopsis	C. amomum	3	3	4.96774	5.16129	4.64516	0.9625	1.11111	7	71.4286	0	0	1	0	1	0	0	1	2	2
BW	Kraniopsis	C. amomum	3	3	5.22581	5.6129	4.83871	0.931034	1.16	8	50	0	0	1	0	1	0	0	1	2	2
BW	Kraniopsis	C. amomum	3	3	5.35484	5.87097	5.03226	0.912088	1.16667	8	62.5	0	0	1	0	1	0	1	1	2	2
BW	Kraniopsis	C. amomum	3	3	5.41935	5.67742	4.64516	0.954545	1.22222	8	50	0	0	1	0	1	0	0	1	2	2
BW	Kraniopsis	C. amomum	3	3	4.96774	5.74194	4.51613	0.865169	1.27143	8	75	0	0	1	0	1	0	1	1	2	2
BW	Kraniopsis	C. amomum	3	4	4.45161	5.67742	4.51613	0.784091	1.25714	8	37.5	0	0	1	0	0	0	1	0	2	2
BW	Kraniopsis	C. amomum	3	4	3.87097	5.29032	4.25806	0.731707	1.24242	8	50	0	0	1	0	0	0	1	0	2	2
BW	Kraniopsis	C. amomum	3	4	4.19355	5.29032	4.32258	0.792683	1.22388	8	25	0	0	1	0	0	0	1	0	2	2
BW	Kraniopsis	C. amomum	3	4	4	5.67742	4.77419	0.704545	1.18919	8	50	0	0	1	0	0	0	1	0	2	2
BW	Kraniopsis	C. amomum	3	4	4.32258	5.67742	4.51613	0.761364	1.25714	8	37.5	0	0	1	0	0	0	1	0	2	2
BW	Kraniopsis	C. amomum	3	4	4.90323	5.35484	4.70968	0.915663	1.13699	8	37.5	0	0	1	0	0	0	1	0	2	2
BW	Kraniopsis	C. amomum	3	4	4	4.77419	3.93548	0.837838	1.21311	7	42.8571	0	0	1	0	0	0	1	0	2	2
BW	Kraniopsis	C. amomum	3	4	3.67742	5.03226	4.25806	0.730769	1.18182	8	37.5	0	0	1	0	0	0	1	0	2	2
BW	Kraniopsis	C. amomum	3	4	3.87097	4.64516	3.93548	0.833333	1.18033	8	37.5	0	0	1	0	0	0	1	0	2	2
BW	Kraniopsis	C. amomum	3	4	4.06452	4.83871	3.80645	0.84	1.27119	6	33.3333	0	0	1	0	0	0	1	0	2	2
BW	Kraniopsis	C. amomum	3	11	4.3871	4.51613	3.16129	0.971429	1.42857	8	0	0	0	0	0	1	0	2	1	2	2
BW	Kraniopsis	C. amomum	3	11	4.58065	5.03226	4.19355	0.910256	1.2	8	75	0	0	1	0	1	0	2	1	2	2
BW	Kraniopsis	C. amomum	3	11	4.45161	4.12903	3.29032	1.07812	1.2549	8	57.1429	0	0	1	0	1	1	2	1	2	2
BW	Kraniopsis	C. amomum	3	11	4.64516	4.19355	3.87097	1.10769	1.08333	7	28.5714	0	0	1	0	1	1	2	0	2	2
BW	Kraniopsis	C. amomum	3	11	4.3871	4.51613	3.80645	0.971429	1.18644	8	50	0	0	1	0	1	0	2	0	2	2
BW	Kraniopsis	C. amomum	3	11	4.32258	4.51613	3.74194	0.957143	1.2069	8	37.5	0	0	1	0	1	0	2	0	2	2
BW	Kraniopsis	C. amomum	3	11	4.58065	4.19355	3.41935	1.09231	1.22642	8	37.5	0	0	1	0	1	0	2	0	2	2
BW	Kraniopsis	C. amomum	3	11	4.77419	4.70968	3.93548	1.0137	1.19672	6	66.6667	0	0	1	0	1	0	2	0	2	2
BW	Kraniopsis	C. amomum	3	11	4.19355	4.32258	3.80645	0.970149	1.13559	7	57.1429	0	0	1	0	1	1	2	0	2	2
BW	Kraniopsis	C. amomum	3	11	4.51613	4.70968	4	0.958904	1.17742	7	28.5714	0	0	1	0	1	1	2	0	2	2
BW	Kraniopsis	C. amomum	3	11	4.58065	4.64516	3.74194	0.986111	1.24138	8	50	0	0	1	0	1	0	2	0	2	2
BW	Kraniopsis	C. amomum	3	11	4.3871	4.3871	4	1	1.09677	8	12.5	0	0	1	0	1	1	2	0	2	2
BW	Kraniopsis	C. amomum	3	11	4.64516	4.58065	4.12903	1.01408	1.10938	8	25	0	0	1	0	1	0	2	0	2	2
BW	Kraniopsis	C. amomum	3	11	4.3871	4.32258	3.54839	1.01493	1.21818	7	37.5	0	0	1	0	1	0	2	0	2	2
BW	Kraniopsis	C. amomum	3	11	3.93548	4.12903	2.90323	0.953125	1.42222	6	16.6667	0	0	1	0	1	1	2	0	2	2
BW	Kraniopsis	C. amomum	3	11	5.03226	4.64516	3.74194	1.08333	1.24138	8	25	0	0	1	0	1	1	2	0	3	2
BW	Kraniopsis	C. amomum	3	11	4.64516	4.70968	3.6129	0.986301	1.30357	8	25	0	0	1	0	1	0	2	0	3	2
BW	Kraniopsis	C. amomum	3	11	4.70968	4.83871	3.93548	0.973333	1.22951	8	37.5	0	0	1	0	1	1	2	0	3	2
BW	Kraniopsis	C. amomum	3	11	4.32258	4.45161	3.67742	0.971014	1.21053	8	50	0	0	1	0	1	1	2	0	3	2
BW	Kraniopsis	C. amomum	3	11	4.64516	4.58065	3.93548	1.01408	1.16393	7	42.8571	0	0	1	0	1	1	2	0	3	2
BW	Kraniopsis	C. amomum	3	11	4.58065	4.3871	3.74194	1.04412	1.17241	8	25	0	0	1	0	1	0	2	0	3	2
BW	Kraniopsis	C. amomum	3	11	4.51613	4.25806	3.93548	1.06061	1.08197	7	42.8571	0	0	1	0	1	0	2	0	3	2
BW	Kraniopsis	C. amomum	3	11	4.70968	4.83871	4.19355	0.973333	1.15385	7	42.8571	0	0	1	0	1	0	2	0	3	2
BW	Kraniopsis	C. amomum	3	11	4.25806	4.51613	3.80645	0.942857	1.18644	7	42.8571	0	0	1	0	1	1	2	0	3	2
BW	Kraniopsis	C. amomum	3	11	4.45161	4.25806	3.29032	1.04545	1.29412	7	28.5714	0	0	1	0	1	1	2	1	2	2
BW	Kraniopsis	C. amomum	3	11	4.64516	4.83871	3.80645	0.96	1.27119	7	28.5714	0	0	1	0	1	0	2	1	2	2
BW	Kraniopsis	C. amomum	3	11	4.70968	4.3871	4.06452	1.07353	1.07937	7	14.2857	0	0	1	0	1	0	1	1	2	2
BW	Kraniopsis	C. amomum	3	11	4.3871	3.87097	3.67742	1.13333	1.05263	7	42.8571	0	0	1	0	1	1	2	0	2	2
BW	Kraniopsis	C. amomum	3	11	4.32258	4.90323	4	0.881579	1.22581	8	37.5	0	0	1	0	1	1	2	0	2	2
BW	Kraniopsis	C. amomum	3	11	4.32258	4.06452	3.29032	1.06349	1.23529	8	37.5	0	0	1	0	1	0	2	0	3	2
BW	Kraniopsis	C. amomum	3	12	5.35484	4.64516	3.67742	1.15278	1.26316	8	12.5	0	0	1	0	1	0	2	1	2	2
BW	Kraniopsis	C. amomum	3	12	5.41935	4.77419	3.80645	1.13514	1.25424	7	42.8571	0	0	1	0	1	1	2	1	2	2
BW	Kraniopsis	C. amomum	3	12	5.6129	4.83871	4.19355	1.16	1.15385	6	66.6667	0	0	1	0	1	1	2	1	2	2
BW	Kraniopsis	C. amomum	3	12	5.09677	4.77419	3.87097	1.06757	1.23333	6	33.3333	0	0	1	0	1	0	2	1	2	2
BW	Kraniopsis	C. amomum	3	12	5.35484	4.64516	3.93548	1.15278	1.18033	6	33.3333	0	0	1	0	1	1	2	1	2	2
BW	Kraniopsis	C. amomum	3	12	5.54839	4.64516	3.74194	1.19444	1.24138	7	57.1429	0	0	1	0	1	1	2	1	2	2
BW	Kraniopsis	C. amomum	3	12	5.22581	4.77419	3.80645	1.09459	1.25424	4	100	0	0	1	0	1	0	2	1	2	2
BW	Kraniopsis	C. amomum	3	12	5.6129	4.77419	3.6129	1.17568	1.32143	5	80	0	0	1	0	1	0	2	1	2	2
BW	Kraniopsis	C. amomum	3	12	5.80645	4.77419	4.19355	1.21622	1.13846	5	60	0	0	1	0	1	0	2	1	2	2
BW	Kraniopsis	C. amomum	3	12	5.67742	5.09677	3.87097	1.11392	1.31667	5	60	0	0	1	0	1	1	2	1	2	2
BW	Kraniopsis	C. amomum	3	12	5.74194	4.83871	4.58065	1.18667	1.05634	6	66.6667	0	0	1	0	1	1	2	1	2	2
BW	Kraniopsis	C. amomum	3	12	5.03226	4.64516	3.93548	1.08333	1.18033	6	33.3333	0	0	1	0	1	1	2	1	2	2
BW	Kraniopsis	C. amomum	3	12	5.09677	4.70968	4	1.08219	1.17742	6	50	0	0	1	0	1	1	2	1	2	2
BW	Kraniopsis	C. amomum	3	12	5.87097	4.96774	4.51613	1.18182	1.1	8	62.5	0	0	1	0	1	1	2	1	3	2
BW	Kraniopsis	C. amomum	3	12	4.90323	4.45161	3.74194	1.10145	1.18966	7	28.5714	0	0	1	0	1	1	2	1	3	2
BW	Kraniopsis	C. amomum	3	12	4.96774	4.83871	3.87097	1.02667	1.25	5	40	0	0	1	0	1	1	2	1	3	2
BW	Kraniopsis	C. amomum	3	12	5.41935	4.83871	4.06452	1.12	1.19048	6	66.6667	0	0	1	0	1	1	2	1	3	2
BW	Kraniopsis	C. amomum	3	12	5.09677	4.3871	3.87097	1.16176	1.13333	7	28.5714	0	0	1	0	1	1	2	1	3	2
BW	Kraniopsis	C. amomum	3	12	5.03226	4.83871	3.74194	1.04	1.2931	4	100	0	0	1	0	1	1	2	1	3	2
BW	Kraniopsis	C. amomum	3	12	4.96774	4.83871	3.93548	1.02667	1.22951	6	83.3333	0	0	1	0	1	1	2	1	3	2
BW	Kraniopsis	C. amomum	3	12	5.35484	4.77419	4.19355	1.12162	1.13846	8	62.5	0	0	1	0	1	1	2	1	3	2
BW	Kraniopsis	C. amomum	3	12	4.77419	4.58065	3.48387	1.04225	1.31481	5	60	0	0	1	0	1	1	2	1	3	2
BW	Kraniopsis	C. amomum	3	12	5.03226	4.51613	3.74194	1.11429	1.2069	7	57.1429	0	0	1	0	1	1	2	1	3	2
BW	Kraniopsis	C. amomum	3	12	4.96774	4.45161	3.93548	1.11594	1.13115	6	66.6667	0	0	1	0	1	1	2	0	2	2
BW	Kraniopsis	C. amomum	3	12	5.48387	4.58065	3.93548	1.19718	1.16393	5	60	0	0	1	0	1	1	2	0	2	2
BW	Kraniopsis	C. amomum	3	12	5.22581	4.51613	4	1.15714	1.12903	7	71.4286	0	0	1	0	1	1	2	0	3	2
BW	Kraniopsis	C. amomum	3	12	4.83871	4.3871	3.93548	1.10294	1.11475	6	50	0	0	1	0	1	1	2	1	2	2
BW	Kraniopsis	C. amomum	3	12	5.67742	4.45161	3.87097	1.27536	1.15	7	71.4286	0	0	1	0	1	1	2	1	2	2
BW	Kraniopsis	C. amomum	3	12	5.35484	4.3871	3.80645	1.22059	1.15254	6	33.3333	0	0	1	0	1	1	2	1	3	2
BW	Kraniopsis	C. amomum	3	12	4.83871	4.77419	3.93548	1.01351	1.21311	5	40	0	0	1	0	1	1	2	1	3	2
BW	Kraniopsis	C. amomum	3	13	3.93548	4.51613	4	0.871429	1.12903	8	50	0	0	1	0	1	1	2	0	2	2
BW	Kraniopsis	C. amomum	3	13	4.58065	4.32258	3.67742	1.0597	1.17544	8	25	0	0	1	0	1	1	2	0	2	2
BW	Kraniopsis	C. amomum	3	13	4.64516	4.45161	4.06452	1.04348	1.09524	8	50	0	0	1	0	1	1	2	0	2	2
BW	Kraniopsis	C. amomum	3	13	3.74194	4.45161	3.80645	0.84058	1.16949	7	71.4286	0	0	1	0	1	1	2	0	2	2
BW	Kraniopsis	C. amomum	3	13	4.06452	4.25806	3.74194	0.954545	1.13793	6	66.6667	0	0	1	0	1	1	0	0	2	2
BW	Kraniopsis	C. amomum	3	13	3.87097	4.25806	3.74194	0.909091	1.13793	8	0	0	0	0	0	1	1	2	0	2	2
BW	Kraniopsis	C. amomum	3	13	3.54839	4.12903	3.74194	0.859375	1.10345	6	33.3333	0	0	1	0	1	1	2	0	2	2
BW	Kraniopsis	C. amomum	3	13	3.41935	4.32258	4	0.791045	1.08065	7	42.8571	0	0	1	0	1	1	2	0	2	2
BW	Kraniopsis	C. amomum	3	13	3.48387	4.19355	3.80645	0.830769	1.10169	7	42.8571	0	0	1	0	1	1	2	0	2	2
BW	Kraniopsis	C. amomum	3	13	4.12903	4.64516	4.19355	0.888889	1.10769	8	25	0	0	1	0	1	1	2	0	2	2
BW	Kraniopsis	C. amomum	3	13	3.48387	3.74194	3.74194	0.931034	1	6	66.6667	0	0	1	0	1	1	0	0	2	2
BW	Kraniopsis	C. amomum	3	13	3.22581	3.87097	3.41935	0.833333	1.13208	6	66.6667	0	0	1	0	1	1	2	0	2	2
BW	Kraniopsis	C. amomum	3	13	4.64516	4.3871	3.87097	1.05882	1.13333	5	60	0	0	1	0	1	1	2	0	2	2
BW	Kraniopsis	C. amomum	3	13	4	4.64516	4.3871	0.861111	1.05882	8	62.5	0	0	1	0	1	1	2	0	2	2
BW	Kraniopsis	C. amomum	3	13	3.35484	4.25806	4	0.787879	1.06452	8	50	0	0	1	0	1	1	2	0	2	2
BW	Kraniopsis	C. amomum	3	13	3.87097	4.51613	4.19355	0.857143	1.07692	8	37.5	0	0	1	0	1	1	2	0	2	2
BW	Kraniopsis	C. amomum	3	13	3.67742	4.58065	4.12903	0.802817	1.10938	6	50	0	0	1	0	1	1	2	0	2	2
BW	Kraniopsis	C. amomum	3	13	3.74194	4.64516	4.19355	0.805556	1.10769	7	57.1429	0	0	1	0	1	1	2	0	2	2
BW	Kraniopsis	C. amomum	3	13	3.74194	4.45161	4.12903	0.84058	1.07812	8	25	0	0	1	0	1	1	2	0	2	2
BW	Kraniopsis	C. amomum	3	13	3.74194	4.58065	4.12903	0.816901	1.10938	6	50	0	0	1	0	1	1	2	0	2	2
BW	Kraniopsis	C. amomum	3	13	4.06452	5.03226	4.45161	0.807692	1.13043	10	30	0	0	1	0	1	1	2	0	2	2
BW	Kraniopsis	C. amomum	3	13	3.6129	4.32258	3.87097	0.835821	1.11667	7	28.5714	0	0	1	0	1	1	2	0	2	2
BW	Kraniopsis	C. amomum	3	13	3.6129	4.19355	4	0.861538	1.04839	7	57.1429	0	0	1	0	1	1	2	0	2	2
BW	Kraniopsis	C. amomum	3	13	4.06452	4.25806	4.12903	0.954545	1.03125	7	57.1429	0	0	1	0	1	1	0	0	2	2
BW	Kraniopsis	C. amomum	3	13	4.06452	4.25806	3.6129	0.954545	1.17857	7	42.8571	0	0	1	0	1	1	2	0	2	2
BW	Kraniopsis	C. amomum	3	13	3.6129	4.06452	4	0.888889	1.01613	6	33.3333	0	0	1	0	1	1	0	0	2	2
BW	Kraniopsis	C. amomum	3	13	3.80645	4.12903	3.67742	0.921875	1.12281	7	85.7143	0	0	1	0	1	1	2	0	2	2
BW	Kraniopsis	C. amomum	3	13	3.87097	4.51613	4.06452	0.857143	1.11111	8	37.5	0	0	1	0	1	1	2	0	3	2
BW	Kraniopsis	C. amomum	3	13	4.58065	4.45161	3.67742	1.02899	1.21053	7	42.8571	0	0	1	0	1	1	2	0	3	2
BW	Kraniopsis	C. amomum	3	13	3.67742	4.19355	3.54839	0.876923	1.18182	7	28.5714	0	0	1	0	1	1	2	0	3	2
BW	Kraniopsis	C. amomum	3	14	5.09677	5.29032	4.45161	0.963415	1.18841	8	37.5	0	0	1	0	1	1	1	0	2	2
BW	Kraniopsis	C. amomum	3	14	5.09677	4.96774	4.64516	1.02597	1.06944	8	37.5	0	0	1	0	1	1	1	0	2	2
BW	Kraniopsis	C. amomum	3	14	5.09677	4.64516	4.25806	1.09722	1.09091	8	25	0	0	1	0	1	0	1	0	2	2
BW	Kraniopsis	C. amomum	3	14	5.35484	5.22581	4.70968	1.02469	1.10959	7	28.5714	0	0	1	0	1	1	1	0	2	2
BW	Kraniopsis	C. amomum	3	14	5.35484	5.35484	4.96774	1	1.07792	8	50	0	0	1	0	1	1	1	0	2	2
BW	Kraniopsis	C. amomum	3	14	5.54839	5.41935	5.03226	1.02381	1.07692	8	62.5	0	0	1	0	1	1	1	0	2	2
BW	Kraniopsis	C. amomum	3	14	6	4.83871	4.58065	1.24	1.05634	8	25	0	0	1	0	1	1	1	0	2	2
BW	Kraniopsis	C. amomum	3	14	5.29032	5.09677	4.32258	1.03797	1.1791	8	12.5	0	0	1	0	1	0	1	0	2	2
BW	Kraniopsis	C. amomum	3	14	5.87097	5.80645	5.48387	1.01111	1.05882	8	50	0	0	1	0	1	1	1	0	2	2
BW	Kraniopsis	C. amomum	3	14	6.06452	5.67742	5.54839	1.06818	1.02326	8	25	0	0	1	0	1	1	1	0	2	2
BW	Kraniopsis	C. amomum	3	14	5.09677	5.41935	4.70968	0.940476	1.15068	8	50	0	0	1	0	1	1	1	0	2	2
BW	Kraniopsis	C. amomum	3	14	5.09677	4.77419	4.51613	1.06757	1.05714	8	37.5	0	0	1	0	1	1	1	0	2	2
BW	Kraniopsis	C. amomum	3	14	5.93548	5.22581	5.09677	1.1358	1.02532	8	37.5	0	0	1	0	1	0	1	0	2	2
BW	Kraniopsis	C. amomum	3	14	5.6129	5.6129	4.77419	1	1.17568	8	25	0	0	1	0	1	1	1	0	2	2
BW	Kraniopsis	C. amomum	3	14	5.54839	5.67742	5.29032	0.977273	1.07317	8	50	0	0	1	0	1	1	1	0	2	2
BW	Kraniopsis	C. amomum	3	14	5.54839	5.6129	5.29032	0.988506	1.06098	8	37.5	0	0	1	0	1	1	1	0	2	2
BW	Kraniopsis	C. amomum	3	14	5.67742	5.35484	4.90323	1.06024	1.09211	8	37.5	0	0	1	0	1	1	1	0	2	2
BW	Kraniopsis	C. amomum	3	14	5.67742	5.67742	5.41935	1	1.04762	8	25	0	0	1	0	1	1	1	0	2	2
BW	Kraniopsis	C. amomum	3	14	5.41935	5.35484	5.09677	1.01205	1.05063	8	25	0	0	1	0	1	1	1	0	2	2
BW	Kraniopsis	C. amomum	3	14	5.54839	5.22581	4.96774	1.06173	1.05195	8	25	0	0	1	0	1	1	1	0	2	2
BW	Kraniopsis	C. amomum	3	14	5.67742	5.29032	5.03226	1.07317	1.05128	7	42.8571	0	0	1	0	1	0	1	0	2	2
BW	Kraniopsis	C. amomum	3	14	4.96774	4.58065	4.25806	1.08451	1.07576	7	42.8571	0	0	1	0	1	1	1	0	2	2
BW	Kraniopsis	C. amomum	3	14	5.29032	5.54839	5.03226	0.953488	1.10256	7	28.5714	0	0	1	0	1	1	1	0	2	2
BW	Kraniopsis	C. amomum	3	14	5.6129	5.09677	4.58065	1.10127	1.11268	8	37.5	0	0	1	0	1	0	1	0	2	2
BW	Kraniopsis	C. amomum	3	14	6.12903	5.54839	5.41935	1.10465	1.02381	8	25	0	0	1	0	1	0	1	0	2	2
BW	Kraniopsis	C. amomum	3	14	5.93548	5.03226	4.77419	1.17949	1.05405	7	57.1429	0	0	1	0	1	0	1	0	2	2
BW	Kraniopsis	C. amomum	3	14	5.6129	4.83871	4.51613	1.16	1.07143	7	42.8571	0	0	1	0	1	0	1	0	2	2
BW	Kraniopsis	C. amomum	3	14	5.29032	4.64516	4.3871	1.13889	1.05882	8	25	0	0	1	0	1	1	1	0	3	2
BW	Kraniopsis	C. amomum	3	14	4.96774	4.70968	4.64516	1.05479	1.01389	7	57.1429	0	0	1	0	1	1	1	0	3	2
BW	Kraniopsis	C. amomum	3	14	5.29032	5.16129	4.96774	1.025	1.03896	8	37.5	0	0	1	0	1	1	1	0	3	2
BW	Kraniopsis	C. amomum	3	15	5.35484	6	4.12903	0.892473	1.45312	8	50	0	0	1	0	1	1	1	0	2	2
BW	Kraniopsis	C. amomum	3	15	5.87097	6.90323	4.51613	0.850467	1.52857	8	37.5	0	0	1	0	1	1	1	0	2	2
BW	Kraniopsis	C. amomum	3	15	5.35484	5.6129	4.90323	0.954023	1.14474	7	42.8571	0	0	1	0	1	0	0	0	2	2
BW	Kraniopsis	C. amomum	3	15	5.48387	6.06452	4.77419	0.904255	1.27027	7	42.8571	0	0	1	0	1	1	1	0	2	2
BW	Kraniopsis	C. amomum	3	15	5.09677	5.48387	4.32258	0.929412	1.26866	8	12.5	0	0	1	0	1	0	1	0	2	2
BW	Kraniopsis	C. amomum	3	15	5.41935	6.19355	4.25806	0.875	1.45455	7	42.8571	0	0	1	0	1	0	2	0	2	2
BW	Kraniopsis	C. amomum	3	15	5.6129	5.93548	4.19355	0.945652	1.41538	7	57.1429	0	0	1	0	1	1	2	0	2	2
BW	Kraniopsis	C. amomum	3	15	5.93548	5.16129	4.3871	1.15	1.17647	8	25	0	0	1	0	1	1	0	0	2	2
BW	Kraniopsis	C. amomum	3	15	5.74194	6.12903	4.90323	0.936842	1.25	8	25	0	0	1	0	1	1	1	0	2	2
BW	Kraniopsis	C. amomum	3	15	5.09677	5.93548	4.58065	0.858696	1.29577	6	33.3333	0	0	1	0	1	1	1	0	2	2
BW	Kraniopsis	C. amomum	3	15	5.67742	5.67742	5.22581	1	1.08642	8	37.5	0	0	1	0	1	0	0	0	2	2
BW	Kraniopsis	C. amomum	3	15	5.29032	5.74194	4.90323	0.921348	1.17105	8	0	0	0	0	0	1	0	0	0	2	2
BW	Kraniopsis	C. amomum	3	15	5.48387	6.12903	4.83871	0.894737	1.26667	8	37.5	0	0	1	0	1	1	2	0	2	2
BW	Kraniopsis	C. amomum	3	15	5.54839	5.74194	4.32258	0.966292	1.32836	8	25	0	0	1	0	1	0	1	0	2	2
BW	Kraniopsis	C. amomum	3	15	5.29032	5.6129	4	0.942529	1.40323	7	42.8571	0	0	1	0	1	0	1	0	2	2
BW	Kraniopsis	C. amomum	3	15	6.32258	5.93548	4.96774	1.06522	1.19481	8	25	0	0	1	0	1	0	1	0	2	2
BW	Kraniopsis	C. amomum	3	15	5.48387	6	4.32258	0.913978	1.38806	8	25	0	0	1	0	1	0	2	0	2	2
BW	Kraniopsis	C. amomum	3	15	5.67742	5.80645	4.64516	0.977778	1.25	8	37.5	0	0	1	0	1	1	1	0	2	2
BW	Kraniopsis	C. amomum	3	15	5.54839	5.93548	5.22581	0.934783	1.1358	8	25	0	0	1	0	1	0	0	0	2	2
BW	Kraniopsis	C. amomum	3	15	5.41935	5.16129	4.19355	1.05	1.23077	6	33.3333	0	0	1	0	1	0	1	0	2	2
BW	Kraniopsis	C. amomum	3	15	5.16129	5.74194	4.45161	0.898876	1.28986	8	25	0	0	1	0	1	0	2	0	2	2
BW	Kraniopsis	C. amomum	3	15	5.6129	5.54839	4.51613	1.01163	1.22857	7	28.5714	0	0	1	0	1	0	1	0	2	2
BW	Kraniopsis	C. amomum	3	15	4.96774	6.25806	5.03226	0.793814	1.24359	7	28.5714	0	0	1	0	1	0	1	0	2	2
BW	Kraniopsis	C. amomum	3	15	5.41935	5.93548	4.96774	0.913043	1.19481	7	57.1429	0	0	1	0	1	1	0	0	2	2
BW	Kraniopsis	C. amomum	3	15	6.12903	5.80645	4.77419	1.05556	1.21622	6	50	0	0	1	0	1	0	1	0	2	2
BW	Kraniopsis	C. amomum	3	15	5.35484	5.48387	4.3871	0.976471	1.25	8	25	0	0	1	0	1	0	1	0	2	2
BW	Kraniopsis	C. amomum	3	15	5.35484	5.93548	4.96774	0.902174	1.19481	9	22.2222	0	0	1	0	1	0	1	0	2	2
BW	Kraniopsis	C. amomum	3	15	5.09677	5.54839	4.90323	0.918605	1.13158	7	42.8571	0	0	1	0	1	1	1	0	2	2
BW	Kraniopsis	C. amomum	3	15	4.58065	5.48387	4.64516	0.835294	1.18056	6	50	0	0	1	0	1	0	1	0	2	2
BW	Kraniopsis	C. amomum	3	15	4.64516	4.96774	4.45161	0.935065	1.11594	8	12.5	0	0	1	0	1	0	0	0	2	2
BW	Kraniopsis	C. amomum	3	16	4.51613	4.83871	4.32258	0.933333	1.1194	8	37.5	0	0	1	0	1	0	1	0	2	2
BW	Kraniopsis	C. amomum	3	16	4.70968	4.58065	4.3871	1.02817	1.04412	8	25	0	0	1	0	1	0	0	0	2	2
BW	Kraniopsis	C. amomum	3	16	4.83871	5.29032	4.77419	0.914634	1.10811	7	14.2857	0	0	1	0	1	0	1	0	2	2
BW	Kraniopsis	C. amomum	3	16	4.58065	5.09677	4.58065	0.898734	1.11268	8	37.5	0	0	1	0	1	0	1	0	2	2
BW	Kraniopsis	C. amomum	3	16	4.70968	4.90323	4.90323	0.960526	1	8	50	0	0	1	0	1	0	1	0	2	2
BW	Kraniopsis	C. amomum	3	16	4.58065	5.35484	4.70968	0.855422	1.13699	8	50	0	0	1	0	1	0	1	0	2	2
BW	Kraniopsis	C. amomum	3	16	4.83871	5.03226	4.32258	0.961538	1.16418	8	37.5	0	0	1	0	1	0	1	0	3	2
BW	Kraniopsis	C. amomum	3	16	4.45161	4.64516	4.25806	0.958333	1.09091	8	25	0	0	1	0	1	0	1	0	2	2
BW	Kraniopsis	C. amomum	3	16	4.64516	4.70968	4.3871	0.986301	1.07353	8	37.5	0	0	1	0	1	0	1	0	2	2
BW	Kraniopsis	C. amomum	3	16	5.16129	5.22581	4.32258	0.987654	1.20896	8	25	0	0	1	0	1	0	1	0	2	2
BW	Kraniopsis	C. amomum	3	16	5.03226	4.77419	4.3871	1.05405	1.08824	8	37.5	0	0	1	0	1	0	1	0	2	2
BW	Kraniopsis	C. amomum	3	16	4.70968	4.77419	4.25806	0.986486	1.12121	8	25	0	0	1	0	1	0	1	0	2	2
BW	Kraniopsis	C. amomum	3	16	4.45161	4.83871	4.32258	0.92	1.1194	8	12.5	0	0	1	0	1	0	1	0	2	2
BW	Kraniopsis	C. amomum	3	16	5.03226	5.29032	4.64516	0.95122	1.13889	8	0	0	0	0	0	1	0	1	0	2	2
BW	Kraniopsis	C. amomum	3	16	4.64516	5.03226	4.32258	0.923077	1.16418	8	12.5	0	0	1	0	1	0	1	0	2	2
BW	Kraniopsis	C. amomum	3	16	4.3871	4.77419	4.51613	0.918919	1.05714	8	12.5	0	0	1	0	1	0	1	0	2	2
BW	Kraniopsis	C. amomum	3	16	5.29032	4.90323	4.12903	1.07895	1.1875	8	37.5	0	0	1	0	1	0	1	0	2	2
BW	Kraniopsis	C. amomum	3	16	4.58065	5.09677	4.64516	0.898734	1.09722	8	25	0	0	1	0	1	0	1	0	2	2
BW	Kraniopsis	C. amomum	3	16	4.58065	4.77419	4.51613	0.959459	1.05714	7	28.5714	0	0	1	0	1	0	1	0	2	2
BW	Kraniopsis	C. amomum	3	16	4.32258	4.32258	4.25806	1	1.01515	7	42.8571	0	0	1	0	1	0	1	0	2	2
BW	Kraniopsis	C. amomum	3	16	4.77419	5.03226	4.25806	0.948718	1.18182	7	42.8571	0	0	1	0	1	0	1	0	2	2
BW	Kraniopsis	C. amomum	3	16	4.64516	5.03226	4.12903	0.923077	1.21875	7	57.1429	0	0	1	0	1	0	1	0	2	2
BW	Kraniopsis	C. amomum	3	16	4.77419	4.96774	4.77419	0.961039	1.04054	8	37.5	0	0	1	0	1	0	1	0	2	2
BW	Kraniopsis	C. amomum	3	16	4.96774	5.09677	4.64516	0.974684	1.09722	8	12.5	0	0	1	0	1	0	1	0	2	2
BW	Kraniopsis	C. amomum	3	16	4.51613	5.22581	4.32258	0.864198	1.20896	8	37.5	0	0	1	0	1	0	1	0	2	2
BW	Kraniopsis	C. amomum	3	16	5.29032	5.35484	4.12903	0.987952	1.29688	8	37.5	0	0	1	0	1	0	1	0	2	2
BW	Kraniopsis	C. amomum	3	16	4.51613	5.09677	4.12903	0.886076	1.23438	8	37.5	0	0	1	0	1	0	1	0	2	2
BW	Kraniopsis	C. amomum	3	16	4.3871	4.64516	4	0.944444	1.16129	8	37.5	0	0	1	0	1	0	1	0	3	2
BW	Kraniopsis	C. amomum	3	16	5.09677	5.6129	4.32258	0.908046	1.29851	8	25	0	0	1	0	1	0	1	0	2	2
BW	Kraniopsis	C. amomum	3	16	4.64516	5.03226	4.3871	0.923077	1.14706	8	0	0	0	0	0	1	0	1	0	2	2
BW	Kraniopsis	C. australis	4	1	4.58065	4.3871	4.06452	1.04412	1.07937	8	37.5	0	0	1	0	0	0	0	3	2	1
BW	Kraniopsis	C. australis	4	1	4.32258	4.3871	3.93548	0.985294	1.11475	8	37.5	0	0	1	0	0	0	0	3	2	1
BW	Kraniopsis	C. australis	4	1	4.25806	4.51613	4.12903	0.942857	1.09375	8	37.5	0	0	1	0	0	0	0	3	2	1
BW	Kraniopsis	C. australis	4	2	4.70968	4.58065	4.19355	1.02817	1.09231	8	62.5	0	0	1	0	0	0	1	3	2	1
BW	Kraniopsis	C. australis	4	2	4.70968	4.64516	4.12903	1.01389	1.125	8	50	0	0	1	0	0	0	1	3	2	1
BW	Kraniopsis	C. australis	4	2	4.32258	4.51613	4	0.957143	1.12903	9	77.7778	0	0	1	0	0	0	1	3	2	1
BW	Kraniopsis	C. australis	4	2	4.3871	4.19355	3.74194	1.04615	1.12069	8	62.5	0	0	1	0	0	0	1	3	2	1
BW	Kraniopsis	C. australis	4	2	4.3871	4.58065	3.93548	0.957746	1.16393	9	66.6667	0	0	1	0	0	0	1	3	2	1
BW	Kraniopsis	C. australis	4	3	5.54839	5.09677	2.77419	1.08861	1.83721	8	37.5	0	0	1	0	0	0	0	2	2	1
BW	Kraniopsis	C. australis	4	3	5.09677	5.22581	2.70968	0.975309	1.92857	8	37.5	0	0	1	0	0	0	1	2	2	1
BW	Kraniopsis	C. australis	4	3	4.96774	4.77419	2.3871	1.04054	2	8	37.5	0	0	1	0	0	0	1	2	2	1
BW	Kraniopsis	C. australis	4	3	4.58065	4.77419	2.3871	0.959459	2	8	75	0	0	1	0	0	0	1	2	2	1
BW	Kraniopsis	C. australis	4	3	5.09677	4.90323	2.3871	1.03947	2.05405	8	37.5	0	0	1	0	0	0	1	3	2	1
BW	Kraniopsis	C. australis	4	4	4.58065	4.77419	4.51613	0.959459	1.05714	8	62.5	0.705882	1.17647	1	1	0	1	0	3	2	1
BW	Kraniopsis	C. australis	4	4	4.32258	4.96774	4.70968	0.87013	1.05479	8	75	1.37255	1.05882	1	1	0	1	0	3	2	1
BW	Kraniopsis	C. australis	4	4	4.12903	4.64516	4.45161	0.888889	1.04348	8	50	0	0	1	0	0	1	0	3	2	1
BW	Kraniopsis	C. australis	4	4	4.32258	4.70968	4.32258	0.917808	1.08955	8	50	0.862745	0.941176	1	1	0	1	1	3	2	1
BW	Kraniopsis	C. australis	4	4	4.06452	4.64516	4.3871	0.875	1.05882	8	50	0	0	1	0	0	0	0	3	2	1
BW	Kraniopsis	C. australis	4	5	4.77419	5.48387	5.48387	0.870588	1	8	25	0	0	1	0	0	0	0	3	2	1
BW	Kraniopsis	C. australis	4	5	5.09677	6	5.80645	0.849462	1.03333	7	71.4286	0	0	1	0	0	0	0	3	2	1
BW	Kraniopsis	C. australis	4	5	4.58065	5.6129	5.29032	0.816092	1.06098	8	25	0	0	1	0	0	0	0	3	2	1
BW	Kraniopsis	C. australis	4	5	4.96774	5.67742	5.48387	0.875	1.03529	8	62.5	0	0	1	0	0	0	0	3	2	1
BW	Kraniopsis	C. australis	4	5	4.45161	5.41935	5.03226	0.821429	1.07692	8	50	0	0	1	0	0	0	0	3	2	1
BW	Kraniopsis	C. australis	4	6	3.93548	4.3871	4.64516	0.897059	0.944444	8	62.5	0	0	1	0	0	0	0	3	2	1
BW	Kraniopsis	C. australis	4	6	3.74194	4.12903	4.12903	0.90625	1	8	62.5	0	0	1	0	0	1	0	3	2	1
BW	Kraniopsis	C. australis	4	6	3.80645	4.25806	4.3871	0.893939	0.970588	6	66.6667	0	0	1	0	0	0	0	3	2	1
BW	Kraniopsis	C. australis	4	6	3.87097	4.19355	4.51613	0.923077	0.928571	7	57.1429	0	0	1	0	0	0	0	3	2	1
BW	Kraniopsis	C. australis	4	6	3.74194	4.19355	4.58065	0.892308	0.915493	8	37.5	0	0	1	0	0	1	0	3	2	1
BW	Kraniopsis	C. australis	4	7	5.80645	4	3.87097	1.45161	1.03333	8	62.5	0	0	1	0	0	1	0	2	1	1
BW	Kraniopsis	C. australis	4	7	6.06452	4	4	1.51613	1	8	75	0	0	1	0	0	1	0	2	1	1
BW	Kraniopsis	C. australis	4	7	6.32258	4.06452	4	1.55556	1.01613	9	77.7778	0	0	1	0	0	1	0	2	1	1
BW	Kraniopsis	C. australis	4	7	6.19355	4.12903	3.87097	1.5	1.06667	9	55.5556	0	0	1	0	0	1	0	2	1	1
BW	Kraniopsis	C. australis	4	7	6.25806	4.19355	3.87097	1.49231	1.08333	8	50	0	0	1	0	0	1	0	2	1	1
BW	Kraniopsis	C. australis	4	8	4.51613	5.35484	4.45161	0.843373	1.2029	7	57.1429	0	0	1	0	0	0	1	3	2	1
BW	Kraniopsis	C. australis	4	8	4.3871	5.35484	4.3871	0.819277	1.22059	8	50	0	0	1	0	0	0	1	3	2	1
BW	Kraniopsis	C. australis	4	8	4.51613	5.29032	4.64516	0.853659	1.13889	8	62.5	0	0	1	0	0	0	1	3	2	1
BW	Kraniopsis	C. australis	4	8	4.12903	5.03226	4.19355	0.820513	1.2	8	75	0	0	1	0	0	1	1	3	2	1
BW	Kraniopsis	C. australis	4	8	4.06452	4.90323	4.19355	0.828947	1.16923	8	50	0	0	1	0	0	0	1	3	2	1
BW	Kraniopsis	C. australis	4	9	4.3871	4.25806	4.19355	1.0303	1.01538	8	62.5	0	0	1	0	0	0	0	3	2	1
BW	Kraniopsis	C. australis	4	9	4.19355	4.32258	4.19355	0.970149	1.03077	8	50	0	0	1	0	0	0	0	3	2	1
BW	Kraniopsis	C. australis	4	9	3.93548	4	3.93548	0.983871	1.01639	8	37.5	0	0	1	0	0	0	0	3	2	1
BW	Kraniopsis	C. australis	4	9	3.80645	4	3.74194	0.951613	1.06897	8	37.5	0	0	1	0	0	0	0	3	2	1
BW	Kraniopsis	C. australis	4	9	3.87097	4.32258	4	0.895522	1.08065	8	75	0	0	1	0	0	1	0	3	2	1
BW	Kraniopsis	C. australis	4	10	4.3871	5.09677	4.51613	0.860759	1.12857	8	50	0	0	1	0	0	1	1	3	2	1
BW	Kraniopsis	C. australis	4	10	4.32258	4.90323	4.45161	0.881579	1.10145	8	62.5	0	0	1	0	0	1	1	3	2	1
BW	Kraniopsis	C. australis	4	10	4.19355	5.09677	4.64516	0.822785	1.09722	10	50	0	0	1	0	0	1	0	3	2	1
BW	Kraniopsis	C. australis	4	10	4.25806	5.09677	4.3871	0.835443	1.16176	7	71.4286	0	0	1	0	0	1	1	3	2	1
BW	Kraniopsis	C. australis	4	10	3.67742	4.51613	4.51613	0.814286	1	7	57.1429	0	0	1	0	0	1	0	3	2	1
BW	Kraniopsis	C. australis	4	10	4.45161	4.96774	4.3871	0.896104	1.13235	8	62.5	0	0	1	0	0	1	1	3	2	1
BW	Kraniopsis	C. australis	4	11	4.77419	4.32258	3.80645	1.10448	1.13559	8	37.5	0	0	1	0	0	0	0	3	2	1
BW	Kraniopsis	C. australis	4	11	4.77419	4.06452	4.19355	1.1746	0.969231	7	0	0	0	0	0	0	0	0	3	2	1
BW	Kraniopsis	C. australis	4	11	4.70968	4.3871	4.3871	1.07353	1	7	42.8571	0	0	1	0	0	0	0	3	2	1
BW	Kraniopsis	C. australis	4	11	5.03226	4.77419	4.51613	1.05405	1.05714	8	37.5	0	0	1	0	0	0	0	3	0	1
BW	Kraniopsis	C. australis	4	11	4.19355	4.12903	4	1.01562	1.03226	8	25	0	0	1	0	0	0	0	3	0	1
BW	Kraniopsis	C. australis	4	11	4	3.93548	3.74194	1.01639	1.05172	8	37.5	0	0	1	0	0	0	0	3	0	1
BW	Kraniopsis	C. australis	4	12	4.19355	4.51613	3.80645	0.928571	1.18644	8	0	0	0	0	0	0	0	1	3	2	1
BW	Kraniopsis	C. australis	4	12	4.64516	4.77419	4.3871	0.972973	1.08824	8	25	0	0	1	0	1	0	0	3	2	1
BW	Kraniopsis	C. australis	4	12	4.90323	4.83871	4.25806	1.01333	1.13636	8	25	0	0	1	0	1	0	1	3	2	1
BW	Kraniopsis	C. australis	4	12	4.70968	4.64516	4	1.01389	1.16129	7	14.2857	0	0	1	0	1	0	0	3	2	1
BW	Kraniopsis	C. australis	4	12	4.25806	3.93548	3.35484	1.08197	1.17308	7	28.5714	0	0	1	0	0	0	0	3	2	1
BW	Kraniopsis	C. australis	4	13	5.74194	4.70968	4.45161	1.21918	1.05797	8	75	0	0	1	0	0	0	1	2	3	1
BW	Kraniopsis	C. australis	4	13	5.35484	4.64516	3.93548	1.15278	1.18033	8	87.5	0	0	1	0	0	0	1	2	3	1
BW	Kraniopsis	C. australis	4	13	5.03226	4.90323	4.32258	1.02632	1.13433	8	75	0	0	1	0	0	0	1	2	2	1
BW	Kraniopsis	C. australis	4	13	5.22581	4.83871	4.25806	1.08	1.13636	8	87.5	0	0	1	0	0	0	1	2	3	1
BW	Kraniopsis	C. australis	4	13	4.96774	4.64516	3.93548	1.06944	1.18033	8	87.5	0	0	1	0	0	0	1	2	3	1
BW	Kraniopsis	C. australis	4	14	5.16129	5.29032	5.22581	0.97561	1.01235	8	0	0	0	0	0	0	0	0	3	2	1
BW	Kraniopsis	C. australis	4	14	5.03226	4.96774	4.96774	1.01299	1	8	25	0	0	1	0	0	0	0	3	2	1
BW	Kraniopsis	C. australis	4	14	5.87097	5.41935	5.35484	1.08333	1.01205	8	0	0	0	0	0	0	0	0	3	0	1
BW	Kraniopsis	C. australis	4	14	5.29032	5.22581	5.22581	1.01235	1	8	37.5	0	0	1	0	0	0	0	3	2	1
BW	Kraniopsis	C. australis	4	15	4.83871	5.41935	4.83871	0.892857	1.12	8	50	0	0	1	0	0	0	1	3	2	1
BW	Kraniopsis	C. australis	4	15	5.09677	5.41935	5.22581	0.940476	1.03704	8	50	0	0	1	0	0	0	0	3	2	1
BW	Kraniopsis	C. australis	4	15	5.22581	5.93548	5.29032	0.880435	1.12195	8	37.5	0	0	1	0	0	0	1	3	2	1
BW	Kraniopsis	C. australis	4	15	4.77419	5.41935	4.96774	0.880952	1.09091	7	57.1429	0	0	1	0	0	0	1	3	2	1
BW	Kraniopsis	C. australis	4	15	5.03226	5.35484	5.41935	0.939759	0.988095	8	37.5	0	0	1	0	0	0	0	3	2	1
BW	Kraniopsis	C. australis	4	15	5.54839	5.80645	5.74194	0.955556	1.01124	8	37.5	0	0	1	0	0	0	0	3	2	1
BW	Kraniopsis	C. australis	4	15	5.29032	6.12903	5.54839	0.863158	1.10465	8	50	0	0	1	0	0	0	0	3	2	1
BW	Kraniopsis	C. australis	4	15	4.58065	5.6129	4.83871	0.816092	1.16	7	57.1429	0	0	1	0	0	0	1	3	2	1
BW	Kraniopsis	C. australis	4	15	5.29032	5.74194	5.41935	0.921348	1.05952	8	25	0	0	1	0	0	0	0	3	2	1
BW	Kraniopsis	C. australis	4	15	5.03226	5.74194	5.22581	0.876404	1.09877	8	62.5	0	0	1	0	0	0	1	3	2	1
BW	Kraniopsis	C. australis	4	15	5.09677	5.6129	5.29032	0.908046	1.06098	8	25	0	0	1	0	0	0	1	3	2	1
BW	Kraniopsis	C. australis	4	15	5.16129	5.6129	5.41935	0.91954	1.03571	8	37.5	0	0	1	0	0	0	1	3	2	1
BW	Kraniopsis	C. australis	4	15	5.03226	5.41935	5.09677	0.928571	1.06329	8	50	0	0	1	0	0	0	0	3	2	1
BW	Kraniopsis	C. australis	4	15	5.09677	5.6129	5.41935	0.908046	1.03571	8	25	0	0	1	0	0	0	1	3	2	1
BW	Kraniopsis	C. australis	4	15	5.29032	5.74194	5.48387	0.921348	1.04706	8	25	0	0	1	0	0	0	0	3	2	1
BW	Kraniopsis	C. australis	4	15	4.83871	5.6129	5.16129	0.862069	1.0875	8	50	0	0	1	0	0	0	1	3	2	1
BW	Kraniopsis	C. australis	4	15	4.96774	5.48387	4.83871	0.905882	1.13333	8	37.5	0	0	1	0	0	0	1	3	2	1
BW	Kraniopsis	C. australis	4	15	5.29032	5.80645	5.35484	0.911111	1.08434	6	50	0	0	1	0	0	0	1	3	2	1
BW	Kraniopsis	C. australis	4	15	4.83871	5.41935	4.83871	0.892857	1.12	8	25	0	0	1	0	0	0	1	3	2	1
BW	Kraniopsis	C. australis	4	15	4.96774	5.48387	5.22581	0.905882	1.04938	7	42.8571	0	0	1	0	0	0	0	3	2	1
BW	Kraniopsis	C. australis	4	15	4.90323	5.29032	4.96774	0.926829	1.06494	7	42.8571	0	0	1	0	0	0	0	3	2	1
BW	Kraniopsis	C. australis	4	15	4.64516	5.35484	4.83871	0.86747	1.10667	7	28.5714	0	0	1	0	0	0	1	3	2	1
BW	Kraniopsis	C. australis	4	15	4.96774	5.67742	5.03226	0.875	1.12821	8	37.5	0	0	1	0	0	0	1	3	2	1
BW	Kraniopsis	C. australis	4	15	5.03226	5.67742	5.16129	0.886364	1.1	8	37.5	0	0	1	0	0	0	1	3	2	1
BW	Kraniopsis	C. australis	4	15	4.83871	5.29032	4.96774	0.914634	1.06494	8	50	0	0	1	0	0	0	0	3	2	1
BW	Kraniopsis	C. australis	4	15	4.51613	5.09677	4.64516	0.886076	1.09722	9	33.3333	0	0	1	0	0	0	0	3	2	1
BW	Kraniopsis	C. australis	4	15	4.70968	5.35484	4.90323	0.879518	1.09211	8	37.5	0	0	1	0	0	0	0	3	2	1
BW	Kraniopsis	C. australis	4	15	4.58065	5.16129	4.64516	0.8875	1.11111	8	50	0	0	1	0	0	0	0	3	2	1
BW	Kraniopsis	C. australis	4	15	4.3871	5.09677	4.58065	0.860759	1.11268	8	25	0	0	1	0	0	0	1	3	2	1
BW	Kraniopsis	C. australis	4	15	4.3871	5.16129	4.64516	0.85	1.11111	9	22.2222	0	0	1	0	0	0	1	3	2	1
BW	Kraniopsis	C. australis	4	16	4.64516	4.19355	3.80645	1.10769	1.10169	7	57.1429	0.745098	0.705882	1	1	0	0	0	3	2	1
BW	Kraniopsis	C. australis	4	16	4.32258	4	3.74194	1.08065	1.06897	7	14.2857	0.980392	0.901961	1	1	0	0	0	3	2	1
BW	Kraniopsis	C. australis	4	16	4.19355	3.80645	3.80645	1.10169	1	8	37.5	0.980392	0.941176	1	1	0	0	0	3	2	1
BW	Kraniopsis	C. australis	4	16	4.64516	4	4	1.16129	1	8	25	0.666667	0.980392	1	1	0	0	0	3	2	1
BW	Kraniopsis	C. australis	4	16	4.70968	4	4.12903	1.17742	0.96875	8	25	0.588235	0.705882	1	1	0	0	0	3	2	1
BW	Kraniopsis	C. australis	4	16	4.58065	3.93548	3.74194	1.16393	1.05172	7	71.4286	0.588235	0.627451	1	1	0	0	0	3	2	1
BW	Kraniopsis	C. australis	4	16	3.80645	4.12903	3.80645	0.921875	1.08475	8	25	0.862745	1.17647	1	1	0	0	0	3	2	1
BW	Kraniopsis	C. australis	4	16	4.19355	4	3.80645	1.04839	1.05085	7	28.5714	0.666667	0.588235	1	1	0	0	0	3	2	1
BW	Kraniopsis	C. australis	4	16	4.32258	4.19355	4	1.03077	1.04839	8	50	0	0	1	0	0	0	0	3	2	1
BW	Kraniopsis	C. australis	4	16	4.19355	4.12903	3.87097	1.01562	1.06667	8	50	0.862745	1.13725	1	1	0	0	0	3	2	1
BW	Kraniopsis	C. australis	4	16	4.12903	4	3.67742	1.03226	1.08772	8	12.5	0.862745	1.05882	1	1	0	0	0	3	2	1
BW	Kraniopsis	C. australis	4	16	4.83871	4.32258	4.06452	1.1194	1.06349	7	42.8571	0.901961	0.862745	1	1	0	0	0	3	2	1
BW	Kraniopsis	C. australis	4	16	4.32258	3.87097	3.80645	1.11667	1.01695	7	42.8571	0.980392	0.862745	1	1	0	0	0	3	3	1
BW	Kraniopsis	C. australis	4	16	4.32258	3.74194	3.67742	1.15517	1.01754	8	37.5	0.588235	0.666667	1	1	0	0	0	3	3	1
BW	Kraniopsis	C. australis	4	16	4.77419	3.74194	3.74194	1.27586	1	7	28.5714	0	0	1	0	0	0	0	3	3	1
BW	Kraniopsis	C. australis	4	16	3.87097	4.06452	3.87097	0.952381	1.05	8	50	0	0	1	0	0	0	0	3	3	1
BW	Kraniopsis	C. australis	4	16	4.32258	4	3.87097	1.08065	1.03333	8	25	0	0	1	0	0	0	0	3	3	1
BW	Kraniopsis	C. australis	4	16	4.19355	4.06452	3.74194	1.03175	1.08621	7	57.1429	0.784314	0.784314	1	1	0	0	0	3	3	1
BW	Kraniopsis	C. australis	4	16	4.19355	4.06452	3.67742	1.03175	1.10526	7	42.8571	0.823529	0.901961	1	1	0	0	0	3	3	1
BW	Kraniopsis	C. australis	4	16	4.83871	4.3871	4.19355	1.10294	1.04615	8	50	0.509804	0.588235	1	1	0	0	0	3	2	1
BW	Kraniopsis	C. australis	4	16	4.32258	4.12903	3.93548	1.04688	1.04918	8	25	0.392157	0.54902	1	1	0	0	0	3	2	1
BW	Kraniopsis	C. australis	4	16	4.90323	4.25806	4.12903	1.15152	1.03125	8	25	0.588235	0.627451	1	1	0	0	0	3	2	1
BW	Kraniopsis	C. australis	4	16	4.25806	4.19355	3.93548	1.01538	1.06557	7	42.8571	0.980392	0.941176	1	1	0	0	0	3	2	1
BW	Kraniopsis	C. australis	4	16	4.70968	4.19355	3.54839	1.12308	1.18182	8	25	0.666667	0.745098	1	1	0	0	0	3	2	1
BW	Kraniopsis	C. australis	4	16	3.87097	4.12903	3.87097	0.9375	1.06667	8	37.5	0	0	1	0	0	0	0	3	2	1
BW	Kraniopsis	C. australis	4	16	4.70968	4	3.74194	1.17742	1.06897	7	57.1429	0.745098	0.980392	1	1	0	0	0	3	2	1
BW	Kraniopsis	C. australis	4	16	3.93548	3.87097	3.87097	1.01667	1	8	62.5	0.666667	0.823529	1	1	0	0	0	3	3	1
BW	Kraniopsis	C. australis	4	16	4.32258	3.93548	3.87097	1.09836	1.01667	8	37.5	0.784314	0.627451	1	1	0	0	0	3	3	1
BW	Kraniopsis	C. australis	4	16	5.41935	5.03226	4.64516	1.07692	1.08333	8	25	0	0	1	0	0	0	0	3	3	1
BW	Kraniopsis	C. australis	4	16	4.12903	3.93548	3.67742	1.04918	1.07018	7	28.5714	0	0	1	0	0	0	0	3	3	1
BW	Kraniopsis	C. australis	4	17	5.22581	5.35484	4.77419	0.975904	1.12162	8	37.5	0	0	1	0	1	1	1	3	3	2
BW	Kraniopsis	C. australis	4	17	5.03226	4.96774	4.51613	1.01299	1.1	8	25	0	0	1	0	1	1	1	3	3	2
BW	Kraniopsis	C. australis	4	17	4.83871	5.22581	4.64516	0.925926	1.125	8	37.5	0	0	1	0	1	1	1	3	3	2
BW	Kraniopsis	C. australis	4	17	5.09677	5.16129	4.58065	0.9875	1.12676	7	71.4286	0	0	1	0	1	1	1	3	3	2
BW	Kraniopsis	C. australis	4	17	4.51613	4.64516	4.19355	0.972222	1.10769	8	25	0	0	1	0	1	1	1	3	3	2
BW	Kraniopsis	C. australis	4	17	4.96774	4.96774	4.45161	1	1.11594	8	25	0	0	1	0	1	1	1	3	3	2
BW	Kraniopsis	C. australis	4	17	5.03226	4.70968	4.64516	1.06849	1.01389	6	100	0	0	1	0	1	0	0	3	3	2
BW	Kraniopsis	C. australis	4	17	4.77419	4.90323	4.77419	0.973684	1.02703	8	87.5	0	0	1	0	1	0	0	3	3	2
BW	Kraniopsis	C. australis	4	17	5.54839	5.16129	4.25806	1.075	1.21212	8	37.5	0	0	1	0	1	1	1	3	3	1
BW	Kraniopsis	C. australis	4	17	5.03226	4.64516	4.19355	1.08333	1.10769	8	50	0	0	1	0	1	1	1	3	3	1
BW	Kraniopsis	C. australis	4	17	5.09677	4.70968	4.25806	1.08219	1.10606	8	50	0	0	1	0	1	1	1	3	2	1
BW	Kraniopsis	C. australis	4	17	5.29032	4.70968	4.32258	1.12329	1.08955	8	37.5	0	0	1	0	1	1	1	3	2	1
BW	Kraniopsis	C. australis	4	17	4.96774	4.64516	4.51613	1.06944	1.02857	7	71.4286	0	0	1	0	1	0	0	3	2	1
BW	Kraniopsis	C. australis	4	17	4.90323	4.70968	4.70968	1.0411	1	8	37.5	0	0	1	0	1	1	1	3	0	1
BW	Kraniopsis	C. australis	4	17	5.41935	5.16129	4.70968	1.05	1.09589	7	100	0	0	1	0	1	0	0	3	0	1
BW	Kraniopsis	C. australis	4	17	4.64516	4.77419	4.32258	0.972973	1.10448	6	100	0	0	1	0	1	0	0	3	3	1
BW	Kraniopsis	C. australis	4	17	5.35484	4.96774	4.25806	1.07792	1.16667	6	83.3333	0	0	1	0	1	1	1	3	3	1
BW	Kraniopsis	C. australis	4	17	5.03226	4.45161	4	1.13043	1.1129	8	75	0	0	1	0	0	1	1	3	3	1
BW	Kraniopsis	C. australis	4	17	5.22581	5.41935	5.22581	0.964286	1.03704	8	75	0	0	1	0	1	0	0	3	3	1
BW	Kraniopsis	C. australis	4	17	5.03226	4.96774	4.45161	1.01299	1.11594	8	62.5	0	0	1	0	1	1	1	3	2	1
BW	Kraniopsis	C. australis	4	17	5.54839	4.19355	4.06452	1.32308	1.03175	7	42.8571	0	0	1	0	0	0	0	3	3	1
BW	Kraniopsis	C. australis	4	17	4.45161	3.87097	3.74194	1.15	1.03448	8	50	0	0	1	0	1	0	0	3	3	1
BW	Kraniopsis	C. australis	4	17	5.54839	4.83871	4.64516	1.14667	1.04167	8	12.5	0	0	1	0	1	0	0	3	3	1
BW	Kraniopsis	C. australis	4	17	5.93548	4.3871	4	1.35294	1.09677	8	25	0	0	1	0	1	0	0	3	2	1
BW	Kraniopsis	C. australis	4	17	4.77419	4.12903	3.80645	1.15625	1.08475	6	83.3333	0	0	1	0	0	0	0	3	0	2
BW	Kraniopsis	C. australis	4	17	3.93548	3.22581	3.48387	1.22	0.925926	8	25	0	0	1	0	0	0	0	3	0	2
BW	Kraniopsis	C. australis	4	17	4.90323	4.25806	4	1.15152	1.06452	8	50	0	0	1	0	0	0	0	3	3	1
BW	Kraniopsis	C. australis	4	17	5.03226	3.87097	3.74194	1.3	1.03448	7	57.1429	0	0	1	0	1	0	0	3	2	1
BW	Kraniopsis	C. australis	4	17	4.51613	3.93548	3.6129	1.14754	1.08929	7	57.1429	0	0	1	0	0	0	0	3	3	2
BW	Kraniopsis	C. australis	4	17	4.70968	3.87097	3.67742	1.21667	1.05263	8	37.5	0	0	1	0	0	1	1	3	3	1
BW	Kraniopsis	C. australis	4	18	4.70968	4.90323	4.58065	0.960526	1.07042	8	50	0	0	1	0	1	0	0	3	2	1
BW	Kraniopsis	C. australis	4	18	4.96774	4.83871	4.64516	1.02667	1.04167	8	0	0	0	0	0	1	0	0	3	2	1
BW	Kraniopsis	C. australis	4	18	4.45161	4.70968	4.51613	0.945205	1.04286	8	50	0	0	1	0	1	0	0	3	2	1
BW	Kraniopsis	C. australis	4	18	4.96774	4.83871	4.64516	1.02667	1.04167	8	0	0	0	0	0	1	0	0	3	2	1
BW	Kraniopsis	C. australis	4	18	4.77419	4.51613	4.45161	1.05714	1.01449	8	0	0	0	0	0	1	0	0	3	2	1
BW	Kraniopsis	C. australis	4	18	4.90323	4.83871	4.3871	1.01333	1.10294	8	25	0	0	1	0	1	0	0	3	2	1
BW	Kraniopsis	C. australis	4	18	5.16129	4.90323	4.70968	1.05263	1.0411	8	12.5	0	0	1	0	1	0	0	3	2	1
BW	Kraniopsis	C. australis	4	18	5.41935	5.22581	4.90323	1.03704	1.06579	8	25	0	0	1	0	1	0	0	3	2	1
BW	Kraniopsis	C. australis	4	18	5.03226	4.64516	4.32258	1.08333	1.07463	8	25	0	0	1	0	1	0	0	3	2	1
BW	Kraniopsis	C. australis	4	18	4.45161	4.64516	4.3871	0.958333	1.05882	8	12.5	0	0	1	0	1	0	0	3	2	1
BW	Kraniopsis	C. australis	4	18	4.83871	4.77419	4.3871	1.01351	1.08824	8	62.5	0	0	1	0	1	0	0	3	2	1
BW	Kraniopsis	C. australis	4	18	5.03226	4.90323	4.51613	1.02632	1.08571	8	37.5	0	0	1	0	1	0	0	3	2	1
BW	Kraniopsis	C. australis	4	18	4.83871	4.64516	4.45161	1.04167	1.04348	8	12.5	0	0	1	0	1	0	0	3	2	1
BW	Kraniopsis	C. australis	4	18	4.90323	4.70968	4.25806	1.0411	1.10606	8	12.5	0	0	1	0	1	0	0	3	2	1
BW	Kraniopsis	C. australis	4	18	4.83871	4.70968	4.32258	1.0274	1.08955	8	12.5	0	0	1	0	1	0	0	3	2	1
BW	Kraniopsis	C. australis	4	18	4.58065	5.09677	4.64516	0.898734	1.09722	8	12.5	0	0	1	0	1	0	0	3	2	1
BW	Kraniopsis	C. australis	4	18	4.58065	4.51613	4.3871	1.01429	1.02941	8	25	0	0	1	0	1	0	0	3	2	1
BW	Kraniopsis	C. australis	4	18	5.16129	4.83871	4.70968	1.06667	1.0274	8	37.5	0	0	1	0	1	0	0	3	2	1
BW	Kraniopsis	C. australis	4	18	5.03226	4.83871	4.70968	1.04	1.0274	8	37.5	0	0	1	0	1	0	0	3	2	1
BW	Kraniopsis	C. australis	4	18	4.3871	4.45161	4.12903	0.985507	1.07812	8	25	0	0	1	0	1	0	0	3	2	1
BW	Kraniopsis	C. australis	4	18	4.32258	4.45161	4.3871	0.971014	1.01471	8	25	0	0	1	0	1	0	0	3	2	1
BW	Kraniopsis	C. australis	4	18	4.96774	4.96774	4.77419	1	1.04054	8	25	0	0	1	0	1	0	0	3	2	1
BW	Kraniopsis	C. australis	4	18	4.3871	4.51613	4.19355	0.971429	1.07692	8	12.5	0	0	1	0	1	0	0	3	2	1
BW	Kraniopsis	C. australis	4	18	4.64516	4.70968	4.58065	0.986301	1.02817	8	37.5	0	0	1	0	1	0	0	0	2	1
BW	Kraniopsis	C. australis	4	18	4.83871	4.83871	4.3871	1	1.10294	8	37.5	0	0	1	0	1	0	0	3	2	1
BW	Kraniopsis	C. australis	4	18	5.03226	5.03226	4.96774	1	1.01299	8	12.5	0	0	1	0	1	0	0	3	2	1
BW	Kraniopsis	C. australis	4	18	4.77419	4.70968	4.45161	1.0137	1.05797	8	37.5	0	0	1	0	1	0	0	3	2	1
BW	Kraniopsis	C. australis	4	18	5.03226	4.90323	4.83871	1.02632	1.01333	8	37.5	0	0	1	0	1	0	0	3	2	1
BW	Kraniopsis	C. australis	4	18	4.83871	4.90323	4.58065	0.986842	1.07042	8	62.5	0	0	1	0	1	0	0	3	2	1
BW	Kraniopsis	C. australis	4	18	5.22581	4.90323	4.77419	1.06579	1.02703	8	12.5	0	0	1	0	1	0	0	3	2	1
BW	Kraniopsis	C. australis	4	19	5.16129	5.41935	4.83871	0.952381	1.12	8	0	0	0	0	0	1	0	0	3	2	1
BW	Kraniopsis	C. australis	4	19	5.03226	5.74194	5.03226	0.876404	1.14103	8	12.5	0	0	1	0	1	0	0	3	2	1
BW	Kraniopsis	C. australis	4	19	5.09677	5.54839	4.70968	0.918605	1.17808	8	12.5	0	0	1	0	1	0	0	3	2	1
BW	Kraniopsis	C. australis	4	19	5.03226	5.6129	4.96774	0.896552	1.12987	8	0	0	0	0	0	1	0	0	3	2	1
BW	Kraniopsis	C. australis	4	19	4.83871	4.96774	4.58065	0.974026	1.08451	8	0	0	0	0	0	1	0	0	3	2	1
BW	Kraniopsis	C. australis	4	19	4.90323	5.29032	4.77419	0.926829	1.10811	8	50	0	0	1	0	1	1	1	3	2	1
BW	Kraniopsis	C. australis	4	19	4.96774	5.35484	4.77419	0.927711	1.12162	8	37.5	0	0	1	0	1	0	0	3	2	1
BW	Kraniopsis	C. australis	4	19	5.67742	5.80645	4.96774	0.977778	1.16883	7	0	0	0	0	0	1	0	0	3	2	1
BW	Kraniopsis	C. australis	4	19	4.90323	5.41935	4.77419	0.904762	1.13514	8	0	0	0	0	0	1	0	0	3	2	1
BW	Kraniopsis	C. australis	4	19	4.64516	5.22581	4.64516	0.888889	1.125	8	0	0	0	0	0	1	0	0	3	2	1
BW	Kraniopsis	C. australis	4	19	5.22581	5.54839	4.77419	0.94186	1.16216	8	37.5	0	0	1	0	1	0	0	3	2	1
BW	Kraniopsis	C. australis	4	19	4.58065	5.29032	4.51613	0.865854	1.17143	8	25	0	0	1	0	1	0	0	3	2	1
BW	Kraniopsis	C. australis	4	19	5.22581	5.67742	5.03226	0.920455	1.12821	7	14.2857	0	0	1	0	1	0	0	3	2	1
BW	Kraniopsis	C. australis	4	19	4.83871	5.35484	4.90323	0.903614	1.09211	8	37.5	0	0	1	0	1	1	1	3	2	2
BW	Kraniopsis	C. australis	4	19	5.03226	5.16129	4.45161	0.975	1.15942	7	14.2857	0	0	1	0	1	0	0	3	2	2
BW	Kraniopsis	C. australis	4	19	5.03226	5.22581	4.77419	0.962963	1.09459	8	25	0	0	1	0	1	0	0	3	2	2
BW	Kraniopsis	C. australis	4	19	5.35484	5.74194	4.90323	0.932584	1.17105	8	0	0	0	0	0	1	1	1	3	2	1
BW	Kraniopsis	C. australis	4	19	5.22581	5.41935	4.83871	0.964286	1.12	8	37.5	0	0	1	0	1	1	1	0	2	1
BW	Kraniopsis	C. australis	4	19	4.77419	5.16129	4.51613	0.925	1.14286	8	37.5	0	0	1	0	1	0	0	3	2	1
BW	Kraniopsis	C. australis	4	19	4.77419	5.22581	4.70968	0.91358	1.10959	8	75	0	0	1	0	1	1	1	3	2	1
BW	Kraniopsis	C. australis	4	19	4.90323	5.29032	4.96774	0.926829	1.06494	8	25	0	0	1	0	1	0	0	3	2	1
BW	Kraniopsis	C. australis	4	19	5.54839	5.80645	5.16129	0.955556	1.125	8	37.5	0	0	1	0	1	0	0	3	2	1
BW	Kraniopsis	C. australis	4	19	5.6129	5.87097	5.22581	0.956044	1.12346	8	0	0	0	0	0	1	0	0	3	2	1
BW	Kraniopsis	C. australis	4	19	5.03226	5.6129	5.09677	0.896552	1.10127	8	0	0	0	0	0	1	1	1	3	2	1
BW	Kraniopsis	C. australis	4	19	4.58065	4.96774	4.32258	0.922078	1.14925	8	37.5	0	0	1	0	1	0	0	3	2	1
BW	Kraniopsis	C. australis	4	19	4.96774	5.48387	4.83871	0.905882	1.13333	6	33.3333	0	0	1	0	1	1	1	3	2	1
BW	Kraniopsis	C. australis	4	19	4.58065	4.96774	4.51613	0.922078	1.1	7	28.5714	0	0	1	0	1	0	0	3	2	1
BW	Kraniopsis	C. australis	4	19	4.90323	5.09677	4.3871	0.962025	1.16176	8	25	0	0	1	0	1	0	0	3	2	1
BW	Kraniopsis	C. australis	4	19	4.90323	5.03226	4.3871	0.974359	1.14706	8	25	0	0	1	0	1	0	0	3	2	2
BW	Kraniopsis	C. australis	4	19	4.70968	4.90323	4.32258	0.960526	1.13433	8	0	0	0	0	0	1	0	0	3	2	1
BW	Kraniopsis	C. australis	4	20	6.32258	5.93548	5.03226	1.06522	1.17949	8	57.1429	0	0	0	0	0	0	0	3	2	1
BW	Kraniopsis	C. australis	4	20	6.25806	5.16129	4.64516	1.2125	1.11111	7	25	0	0	1	0	0	0	0	3	2	1
BW	Kraniopsis	C. australis	4	20	6.06452	5.29032	4.58065	1.14634	1.15493	8	50	0	0	1	0	0	0	0	3	2	1
BW	Kraniopsis	C. australis	4	20	5.67742	5.16129	4.3871	1.1	1.17647	8	25	0	0	1	0	0	0	0	3	2	1
BW	Kraniopsis	C. australis	4	20	5.6129	5.35484	4.45161	1.04819	1.2029	8	37.5	0	0	1	0	0	0	0	3	2	1
BW	Kraniopsis	C. australis	4	20	5.87097	5.16129	4.3871	1.1375	1.17647	8	37.5	0	0	1	0	0	0	0	3	2	1
BW	Kraniopsis	C. australis	4	20	6	5.35484	4.70968	1.12048	1.13699	8	0	0	0	1	0	0	0	0	3	2	1
BW	Kraniopsis	C. australis	4	20	6.12903	5.29032	4.58065	1.15854	1.15493	10	25	0	0	0	0	0	0	0	3	3	1
BW	Kraniopsis	C. australis	4	20	5.48387	5.09677	4.32258	1.07595	1.1791	8	0	0	0	1	0	0	0	0	3	3	1
BW	Kraniopsis	C. australis	4	20	6.12903	5.22581	4.77419	1.17284	1.09459	8	37.5	0	0	0	0	0	0	0	3	3	1
BW	Kraniopsis	C. australis	4	20	5.6129	5.16129	4.32258	1.0875	1.19403	8	12.5	0	0	1	0	0	0	0	3	3	1
BW	Kraniopsis	C. australis	4	20	6	5.03226	4.3871	1.19231	1.14706	8	12.5	0	0	1	0	0	0	0	3	2	1
BW	Kraniopsis	C. australis	4	20	5.74194	5.03226	4.12903	1.14103	1.21875	8	25	0	0	1	0	0	0	0	3	2	1
BW	Kraniopsis	C. australis	4	20	5.67742	5.09677	4.32258	1.11392	1.1791	8	25	0	0	1	0	0	0	0	3	2	1
BW	Kraniopsis	C. australis	4	20	5.41935	5.48387	4.58065	0.988235	1.19718	8	0	0	0	1	0	0	0	0	3	2	1
BW	Kraniopsis	C. australis	4	20	6.12903	5.48387	4.45161	1.11765	1.23188	8	22.2222	0	0	0	0	0	0	0	3	2	1
BW	Kraniopsis	C. australis	4	20	5.93548	5.09677	4.25806	1.16456	1.19697	9	50	0	0	1	0	0	0	0	3	2	1
BW	Kraniopsis	C. australis	4	20	5.29032	5.16129	4.19355	1.025	1.23077	8	75	0	0	1	0	0	0	0	3	3	1
BW	Kraniopsis	C. australis	4	20	5.22581	5.22581	4.32258	1	1.20896	8	25	0	0	1	0	0	0	0	3	2	1
BW	Kraniopsis	C. australis	4	20	5.74194	4.96774	4.25806	1.15584	1.16667	8	25	0	0	1	0	0	0	0	3	3	1
BW	Kraniopsis	C. bretschneideri	5	1	3.48387	3.16129	2.51613	1.10204	1.25641	9	11.1111	0	0	1	0	0	1	2	3	0	1
BW	Kraniopsis	C. bretschneideri	5	1	3.6129	3.16129	2.77419	1.14286	1.13953	8	12.5	0	0	1	0	0	1	2	3	0	1
BW	Kraniopsis	C. bretschneideri	5	1	3.41935	3.03226	2.64516	1.12766	1.14634	7	14.2857	0	0	1	0	0	1	2	3	0	1
BW	Kraniopsis	C. bretschneideri	5	1	3.41935	2.96774	2.70968	1.15217	1.09524	7	57.1429	0	0	1	0	0	1	2	3	0	1
BW	Kraniopsis	C. bretschneideri	5	1	3.54839	3.03226	2.77419	1.17021	1.09302	6	50	0	0	1	0	0	1	2	3	0	1
BW	Kraniopsis	C. bretschneideri	5	1	3.74194	3.09677	2.96774	1.20833	1.04348	9	0	0	0	0	0	0	1	2	3	0	1
BW	Kraniopsis	C. bretschneideri	5	1	3.29032	3.16129	2.64516	1.04082	1.19512	7	14.2857	0	0	1	0	0	1	2	3	0	1
BW	Kraniopsis	C. bretschneideri	5	1	3.41935	2.96774	2.77419	1.15217	1.06977	8	12.5	0	0	1	0	0	1	2	3	0	1
BW	Kraniopsis	C. bretschneideri	5	1	3.16129	3.09677	2.58065	1.02083	1.2	7	14.2857	0	0	1	0	0	1	2	3	0	1
BW	Kraniopsis	C. bretschneideri	5	1	3.35484	3.09677	2.64516	1.08333	1.17073	9	33.3333	0	0	1	0	0	1	2	3	0	1
BW	Kraniopsis	C. bretschneideri	5	1	3.29032	3.22581	2.51613	1.02	1.28205	9	33.3333	0	0	1	0	0	1	2	3	0	1
BW	Kraniopsis	C. bretschneideri	5	1	3.67742	3.29032	2.83871	1.11765	1.15909	7	28.5714	0	0	1	0	0	1	2	3	0	1
BW	Kraniopsis	C. bretschneideri	5	1	3.54839	3.29032	2.90323	1.07843	1.13333	9	22.2222	0	0	1	0	0	1	2	3	0	1
BW	Kraniopsis	C. bretschneideri	5	1	3.41935	3.09677	2.64516	1.10417	1.17073	8	12.5	0	0	1	0	0	1	2	3	0	1
BW	Kraniopsis	C. bretschneideri	5	1	3.29032	3.22581	2.64516	1.02	1.21951	8	37.5	0	0	1	0	0	1	2	3	0	1
BW	Kraniopsis	C. bretschneideri	5	1	3.41935	2.96774	2.77419	1.15217	1.06977	8	25	0	0	1	0	0	1	2	3	0	1
BW	Kraniopsis	C. bretschneideri	5	1	3.41935	3.80645	2.58065	0.898305	1.475	10	20	0	0	1	0	0	1	2	3	0	1
BW	Kraniopsis	C. bretschneideri	5	1	3.48387	3.35484	2.83871	1.03846	1.18182	8	25	0	0	1	0	0	1	2	3	0	1
BW	Kraniopsis	C. bretschneideri	5	1	2.90323	3.22581	2.58065	0.9	1.25	7	42.8571	0	0	1	0	0	1	2	3	0	1
BW	Kraniopsis	C. bretschneideri	5	1	3.41935	3.16129	2.77419	1.08163	1.13953	8	25	0	0	1	0	0	1	2	3	0	1
BW	Kraniopsis	C. bretschneideri	5	1	3.22581	2.90323	2.51613	1.11111	1.15385	8	50	0	0	1	0	0	1	2	3	0	1
BW	Kraniopsis	C. bretschneideri	5	1	3.54839	3.09677	2.70968	1.14583	1.14286	6	33.3333	0	0	1	0	0	1	2	3	0	1
BW	Kraniopsis	C. bretschneideri	5	1	3.54839	3.22581	2.70968	1.1	1.19048	6	33.3333	0	0	1	0	0	1	2	3	0	1
BW	Kraniopsis	C. bretschneideri	5	1	3.48387	2.96774	2.64516	1.17391	1.12195	6	50	0	0	1	0	0	1	2	3	0	1
BW	Kraniopsis	C. bretschneideri	5	1	3.41935	3.09677	2.77419	1.10417	1.11628	7	14.2857	0	0	1	0	0	1	2	3	0	1
BW	Kraniopsis	C. bretschneideri	5	1	3.67742	3.09677	2.64516	1.1875	1.17073	8	25	0	0	1	0	0	1	2	3	0	1
BW	Kraniopsis	C. bretschneideri	5	1	3.35484	3.29032	2.70968	1.01961	1.21429	9	0	0	0	0	0	0	1	2	3	0	1
BW	Kraniopsis	C. bretschneideri	5	1	3.35484	3.35484	2.96774	1	1.13043	7	28.5714	0	0	1	0	0	1	2	3	0	1
BW	Kraniopsis	C. bretschneideri	5	1	3.41935	3.29032	2.96774	1.03922	1.1087	6	33.3333	0	0	1	0	0	1	2	3	0	1
BW	Kraniopsis	C. bretschneideri	5	1	3.16129	3.29032	2.77419	0.960784	1.18605	8	12.5	0	0	1	0	0	1	2	3	0	1
BW	Kraniopsis	C. bretschneideri	5	2	2.90323	3.54839	2.83871	0.818182	1.25	8	37.5	0	0	1	0	0	1	1	3	2	1
BW	Kraniopsis	C. bretschneideri	5	2	3.09677	3.16129	2.58065	0.979592	1.225	8	37.5	0	0	1	0	0	1	1	3	2	1
BW	Kraniopsis	C. bretschneideri	5	2	3.03226	3.48387	2.77419	0.87037	1.25581	7	28.5714	0	0	1	0	0	1	1	3	2	1
BW	Kraniopsis	C. bretschneideri	5	2	2.83871	3.48387	2.90323	0.814815	1.2	6	0	0	0	0	0	0	1	1	3	2	1
BW	Kraniopsis	C. bretschneideri	5	2	2.90323	3.29032	2.64516	0.882353	1.2439	8	12.5	0	0	1	0	0	1	1	3	2	1
BW	Kraniopsis	C. bretschneideri	5	2	2.64516	3.16129	2.58065	0.836735	1.225	5	20	0	0	1	0	0	1	1	3	2	1
BW	Kraniopsis	C. bretschneideri	5	2	2.64516	3.48387	2.64516	0.759259	1.31707	8	50	0	0	1	0	0	1	1	3	2	1
BW	Kraniopsis	C. bretschneideri	5	2	2.77419	3.35484	2.64516	0.826923	1.26829	8	37.5	0	0	1	0	0	1	1	3	2	1
BW	Kraniopsis	C. bretschneideri	5	2	3.09677	3.09677	2.77419	1	1.11628	8	12.5	0	0	1	0	0	1	1	3	2	1
BW	Kraniopsis	C. bretschneideri	5	2	2.51613	3.16129	2.45161	0.795918	1.28947	7	14.2857	0	0	1	0	0	1	1	0	2	1
BW	Kraniopsis	C. bretschneideri	5	2	3.41935	3.29032	2.83871	1.03922	1.15909	8	50	0	0	1	0	0	1	1	3	2	1
BW	Kraniopsis	C. bretschneideri	5	2	2.83871	3.93548	2.90323	0.721311	1.35556	9	33.3333	0	0	1	0	0	1	1	3	2	1
BW	Kraniopsis	C. bretschneideri	5	2	3.03226	3.80645	2.77419	0.79661	1.37209	8	50	0	0	1	0	0	1	1	3	2	1
BW	Kraniopsis	C. bretschneideri	5	2	3.54839	3.35484	3.35484	1.05769	1	6	16.6667	0	0	1	0	0	1	1	3	2	1
BW	Kraniopsis	C. bretschneideri	5	2	3.09677	3.22581	2.83871	0.96	1.13636	8	25	0	0	1	0	0	1	1	3	2	1
BW	Kraniopsis	C. bretschneideri	5	2	2.83871	3.22581	2.58065	0.88	1.25	8	0	0	0	0	0	0	1	1	3	2	1
BW	Kraniopsis	C. bretschneideri	5	2	3.03226	3.35484	2.90323	0.903846	1.15556	8	25	0	0	1	0	0	1	0	3	2	1
BW	Kraniopsis	C. bretschneideri	5	2	2.77419	3.67742	2.77419	0.754386	1.32558	6	50	0	0	1	0	0	1	1	3	2	1
BW	Kraniopsis	C. bretschneideri	5	2	2.96774	3.67742	2.70968	0.807018	1.35714	8	37.5	0	0	1	0	0	1	1	3	2	1
BW	Kraniopsis	C. bretschneideri	5	2	2.96774	3.74194	2.70968	0.793103	1.38095	6	66.6667	0	0	1	0	0	1	1	0	2	1
BW	Kraniopsis	C. bretschneideri	5	2	2.90323	3.74194	2.70968	0.775862	1.38095	9	44.4444	0	0	1	0	0	1	1	3	2	1
BW	Kraniopsis	C. bretschneideri	5	2	2.77419	3.48387	2.64516	0.796296	1.31707	8	12.5	0	0	1	0	0	1	1	3	2	1
BW	Kraniopsis	C. bretschneideri	5	2	3.29032	3.09677	2.90323	1.0625	1.06667	8	25	0	0	1	0	0	1	0	3	2	1
BW	Kraniopsis	C. bretschneideri	5	2	2.83871	3.09677	2.77419	0.916667	1.11628	8	25	0	0	1	0	0	1	1	3	2	1
BW	Kraniopsis	C. bretschneideri	5	2	3.22581	3.29032	2.77419	0.980392	1.18605	8	0	0	0	0	0	0	1	1	3	2	1
BW	Kraniopsis	C. bretschneideri	5	2	3.22581	3.16129	2.64516	1.02041	1.19512	8	50	0	0	1	0	0	1	1	3	2	1
BW	Kraniopsis	C. bretschneideri	5	2	2.64516	3.54839	2.77419	0.745455	1.27907	8	50	0	0	1	0	0	1	1	3	2	1
BW	Kraniopsis	C. bretschneideri	5	2	3.03226	3.09677	2.58065	0.979167	1.2	7	28.5714	0	0	1	0	0	1	1	3	2	1
BW	Kraniopsis	C. bretschneideri	5	2	2.83871	3.16129	2.58065	0.897959	1.225	8	25	0	0	1	0	0	1	1	3	2	1
BW	Kraniopsis	C. bretschneideri	5	2	2.70968	3.6129	2.90323	0.75	1.24444	9	11.1111	0	0	1	0	0	1	1	3	2	1
BW	Kraniopsis	C. bretschneideri	5	3	3.41935	3.35484	3.03226	1.01923	1.10638	8	12.5	0.293333	0.506667	1	1	0	0	0	0	0	1
BW	Kraniopsis	C. bretschneideri	5	3	3.35484	3.35484	2.96774	1	1.13043	8	25	0.506667	0.48	1	1	0	0	1	0	0	1
BW	Kraniopsis	C. bretschneideri	5	3	3.6129	3.6129	3.16129	1	1.14286	8	12.5	0.213333	0.373333	1	1	0	0	1	0	0	1
BW	Kraniopsis	C. bretschneideri	5	3	3.54839	3.54839	3.16129	1	1.12245	8	25	0	0	1	0	0	0	1	0	0	1
BW	Kraniopsis	C. bretschneideri	5	3	3.54839	3.35484	2.96774	1.05769	1.13043	8	12.5	0.426667	0.4	1	1	0	0	1	0	0	1
BW	Kraniopsis	C. bretschneideri	5	3	3.03226	3.35484	2.83871	0.903846	1.18182	8	37.5	0.346667	0.453333	1	1	0	0	1	0	0	1
BW	Kraniopsis	C. bretschneideri	5	3	3.16129	3.29032	3.03226	0.960784	1.08511	9	22.2222	0	0	1	0	0	0	0	0	0	1
BW	Kraniopsis	C. bretschneideri	5	3	3.22581	3.54839	3.03226	0.909091	1.17021	8	25	0.32	0.426667	1	1	0	0	1	3	0	1
BW	Kraniopsis	C. bretschneideri	5	3	3.41935	3.74194	3.35484	0.913793	1.11538	8	37.5	0.373333	0.586667	1	1	0	0	1	3	0	1
BW	Kraniopsis	C. bretschneideri	5	3	3.80645	3.6129	3.35484	1.05357	1.07692	8	25	0.453333	0.4	1	1	0	0	1	3	0	1
BW	Kraniopsis	C. bretschneideri	5	3	3.48387	3.48387	3.03226	1	1.14894	8	50	0.666667	0.4	1	1	0	0	1	3	0	1
BW	Kraniopsis	C. bretschneideri	5	3	3.22581	3.35484	3.09677	0.961538	1.08333	8	25	0	0	1	0	0	0	0	3	0	1
BW	Kraniopsis	C. bretschneideri	5	3	3.22581	3.6129	3.16129	0.892857	1.14286	8	25	0	0	1	0	0	0	1	3	0	1
BW	Kraniopsis	C. bretschneideri	5	3	3.48387	3.48387	3.03226	1	1.14894	8	0	0.4	0.4	0	1	0	0	1	3	0	1
BW	Kraniopsis	C. bretschneideri	5	3	2.96774	3.22581	2.83871	0.92	1.13636	8	12.5	0.346667	0.4	1	1	0	0	0	3	0	1
BW	Kraniopsis	C. bretschneideri	5	3	3.41935	3.35484	2.96774	1.01923	1.13043	8	62.5	0.346667	0.266667	1	1	0	0	0	3	0	1
BW	Kraniopsis	C. bretschneideri	5	3	3.29032	3.74194	3.16129	0.87931	1.18367	8	25	0.586667	0.453333	1	1	0	0	1	3	0	1
BW	Kraniopsis	C. bretschneideri	5	3	3.67742	3.54839	3.29032	1.03636	1.07843	8	37.5	0.16	0.24	1	1	0	0	1	3	0	1
BW	Kraniopsis	C. bretschneideri	5	3	3.74194	3.48387	3.16129	1.07407	1.10204	8	25	0.293333	0.32	1	1	0	0	0	3	0	1
BW	Kraniopsis	C. bretschneideri	5	3	3.48387	3.6129	3.09677	0.964286	1.16667	9	11.1111	0.586667	0.506667	1	1	0	0	1	3	0	1
BW	Kraniopsis	C. bretschneideri	5	3	3.67742	3.6129	3.22581	1.01786	1.12	8	25	0	0	1	0	0	0	1	3	0	1
BW	Kraniopsis	C. bretschneideri	5	3	3.41935	3.80645	3.16129	0.898305	1.20408	7	14.2857	0	0	1	0	0	0	1	3	0	1
BW	Kraniopsis	C. bretschneideri	5	3	3.6129	3.67742	3.03226	0.982456	1.21277	7	14.2857	0.24	0.453333	1	1	0	0	1	3	0	1
BW	Kraniopsis	C. bretschneideri	5	3	3.22581	3.29032	2.96774	0.980392	1.1087	8	37.5	0.4	0.373333	1	1	0	0	1	3	0	1
BW	Kraniopsis	C. bretschneideri	5	3	3.6129	3.6129	3.03226	1	1.19149	8	50	0.453333	0.4	1	1	0	0	1	3	2	1
BW	Kraniopsis	C. bretschneideri	5	3	3.41935	3.54839	2.90323	0.963636	1.22222	7	0	0	0	0	0	0	0	1	3	2	1
BW	Kraniopsis	C. bretschneideri	5	3	3.29032	3.22581	2.90323	1.02	1.11111	8	0	0.32	0.4	0	1	0	0	0	3	2	1
BW	Kraniopsis	C. bretschneideri	5	3	3.09677	3.16129	2.90323	0.979592	1.08889	6	50	0.346667	0.346667	1	1	0	0	0	3	2	1
BW	Kraniopsis	C. bretschneideri	5	3	3.29032	3.48387	2.96774	0.944444	1.17391	6	33.3333	0.933333	0.453333	1	1	0	0	1	3	2	1
BW	Kraniopsis	C. bretschneideri	5	3	3.41935	3.41935	2.90323	1	1.17778	6	33.3333	0.48	0.48	1	1	0	0	1	3	2	1
BW	Mesomora	C. controversa	6	1	4.06452	4.96774	4.19355	0.818182	1.18462	8	100	2.25806	2.06452	1	1	0	0	1	3	2	0
BW	Mesomora	C. controversa	6	1	3.54839	4.96774	4.25806	0.714286	1.16667	8	100	2.12903	2.12903	1	1	0	0	1	3	2	0
BW	Mesomora	C. controversa	6	1	3.80645	5.09677	4.51613	0.746835	1.12857	8	100	1.74194	2.32258	1	1	0	0	0	3	2	0
BW	Mesomora	C. controversa	6	1	3.87097	5.22581	4.58065	0.740741	1.14085	8	87.5	2.51613	2	1	1	0	0	0	3	2	0
BW	Mesomora	C. controversa	6	1	3.6129	4.64516	4.25806	0.777778	1.09091	8	75	1.87097	1.93548	1	1	0	0	0	3	2	0
BW	Mesomora	C. controversa	6	2	4.83871	5.41935	4	0.892857	1.35484	8	100	1.67742	2.12903	1	1	1	0	1	3	2	0
BW	Mesomora	C. controversa	6	2	4.90323	5.48387	4.32258	0.894118	1.26866	8	100	1.41935	1.87097	1	1	1	0	1	3	2	0
BW	Mesomora	C. controversa	6	2	4.83871	5.80645	4.32258	0.833333	1.34328	8	100	1.74194	2.06452	1	1	1	0	1	3	2	0
BW	Mesomora	C. controversa	6	2	5.03226	6.19355	4.32258	0.8125	1.43284	8	100	1.22581	2.51613	1	1	1	0	1	3	2	0
BW	Mesomora	C. controversa	6	2	4.51613	6	4.25806	0.752688	1.40909	8	100	1.22581	2.32258	1	1	1	0	1	3	2	0
BW	Mesomora	C. controversa	6	3	3.74194	5.03226	4.19355	0.74359	1.2	8	87.5	2.25806	2.06452	1	1	1	0	1	3	2	0
BW	Mesomora	C. controversa	6	3	4.32258	4.64516	4	0.930556	1.16129	7	85.7143	2.12903	1.87097	1	1	1	0	1	3	2	0
BW	Mesomora	C. controversa	6	3	4.12903	5.48387	4.58065	0.752941	1.19718	8	75	1.41935	2.19355	1	1	1	0	1	3	2	0
BW	Mesomora	C. controversa	6	3	3.93548	5.03226	4.3871	0.782051	1.14706	8	75	1.93548	2.32258	1	1	1	0	1	3	2	0
BW	Mesomora	C. controversa	6	3	4	5.16129	4.19355	0.775	1.23077	7	100	2.25806	2.06452	1	1	1	0	1	3	2	0
BW	Mesomora	C. controversa	6	3	4.25806	5.16129	4.25806	0.825	1.21212	8	75	2.06452	2.32258	1	1	1	0	1	3	2	0
BW	Mesomora	C. controversa	6	3	4	5.03226	4	0.794872	1.25806	8	75	2.3871	2.70968	1	1	1	0	1	3	2	0
BW	Mesomora	C. controversa	6	3	4.32258	5.09677	4.32258	0.848101	1.1791	8	87.5	2.45161	2.25806	1	1	1	0	1	3	2	0
BW	Mesomora	C. controversa	6	3	3.6129	4.90323	4.45161	0.736842	1.10145	8	87.5	2.06452	2.51613	1	1	1	0	1	3	2	0
BW	Mesomora	C. controversa	6	3	3.74194	4.90323	4.06452	0.763158	1.20635	7	85.7143	1.93548	2	1	1	1	0	1	3	2	0
BW	Mesomora	C. controversa	6	3	4	5.22581	4.25806	0.765432	1.22727	8	87.5	2.45161	2.06452	1	1	1	0	1	3	2	0
BW	Mesomora	C. controversa	6	4	4.83871	5.48387	4.58065	0.882353	1.19718	8	87.5	0.83871	1.03226	1	1	1	0	1	3	2	0
BW	Mesomora	C. controversa	6	4	4.96774	5.41935	4.96774	0.916667	1.09091	8	87.5	0.709677	1.29032	1	1	1	0	1	3	2	0
BW	Mesomora	C. controversa	6	4	4.06452	4.64516	4.12903	0.875	1.125	8	100	1.03226	1.16129	1	1	1	0	1	3	2	0
BW	Mesomora	C. controversa	6	5	4.45161	5.09677	4.19355	0.873418	1.21538	8	62.5	1.29032	1.54839	1	1	1	0	1	3	2	0
BW	Mesomora	C. controversa	6	5	4.83871	5.03226	3.93548	0.961538	1.27869	8	37.5	1.35484	1.29032	1	1	1	0	1	3	2	0
BW	Mesomora	C. controversa	6	5	4.90323	5.41935	4.70968	0.904762	1.15068	7	85.7143	0.774194	1.80645	1	1	1	0	1	3	2	0
BW	Mesomora	C. controversa	6	5	4.32258	5.09677	4.3871	0.848101	1.16176	8	87.5	1.22581	1.35484	1	1	1	0	1	3	2	0
BW	Mesomora	C. controversa	6	5	4.3871	4.70968	4.06452	0.931507	1.15873	8	75	1.48387	1.6129	1	1	1	0	1	3	2	0
BW	Mesomora	C. controversa	6	6	5.54839	5.67742	5.22581	0.977273	1.08642	8	100	2.83871	2.58065	1	1	1	0	1	3	2	0
BW	Mesomora	C. controversa	6	6	5.6129	5.67742	5.6129	0.988636	1.01149	8	100	2.90323	2.83871	1	1	1	0	1	3	2	0
BW	Mesomora	C. controversa	6	6	5.35484	6	5.93548	0.892473	1.01087	8	37.5	2.58065	2.96774	1	1	1	0	1	3	2	0
BW	Mesomora	C. controversa	6	6	4.90323	5.41935	5.16129	0.904762	1.05	8	100	2.90323	2.77419	1	1	1	0	1	3	2	0
BW	Mesomora	C. controversa	6	6	5.93548	6.12903	5.87097	0.968421	1.04396	8	75	3.67742	3.09677	1	1	1	0	1	3	3	0
BW	Mesomora	C. controversa	6	7	4.70968	6	5.29032	0.784946	1.13415	7	100	2.25806	2.19355	1	1	0	0	0	3	2	0
BW	Mesomora	C. controversa	6	7	5.29032	5.35484	5.29032	0.987952	1.0122	8	100	1.67742	1.93548	1	1	0	0	0	3	2	0
BW	Mesomora	C. controversa	6	7	4.25806	5.09677	4.77419	0.835443	1.06757	8	100	2.25806	1.80645	1	1	0	0	0	3	2	0
BW	Mesomora	C. controversa	6	8	5.74194	5.6129	4.77419	1.02299	1.17568	8	87.5	2.12903	2.19355	1	1	0	0	0	3	2	0
BW	Mesomora	C. controversa	6	8	5.41935	5.93548	5.09677	0.913043	1.16456	6	100	1.93548	1.87097	1	1	0	0	0	3	2	0
BW	Mesomora	C. controversa	6	8	6.12903	5.22581	4.70968	1.17284	1.10959	7	100	2.19355	2.32258	1	1	0	0	0	3	3	0
BW	Mesomora	C. controversa	6	9	4.45161	4.64516	3.87097	0.958333	1.2	8	87.5	2.66667	3.17647	1	1	0	0	2	3	3	0
BW	Mesomora	C. controversa	6	9	4	5.29032	4.25806	0.756098	1.24242	8	100	3.33333	3.52941	1	1	0	0	2	3	3	0
BW	Mesomora	C. controversa	6	9	4.25806	5.16129	4	0.825	1.29032	8	75	2.86275	3.01961	1	1	0	0	2	3	3	0
BW	Mesomora	C. controversa	6	9	3.93548	4.64516	3.87097	0.847222	1.2	7	100	2.5098	2.70588	1	1	0	0	2	3	3	0
BW	Mesomora	C. controversa	6	9	4.32258	5.16129	4.06452	0.8375	1.26984	8	62.5	2.86275	2.82353	1	1	0	0	2	3	3	0
BW	Mesomora	C. controversa	6	9	4.58065	4.90323	3.80645	0.934211	1.28814	8	75	2.86275	2.94118	1	1	0	0	2	3	3	0
BW	Mesomora	C. controversa	6	9	4.45161	5.29032	4	0.841463	1.32258	8	75	3.21569	3.33333	1	1	0	0	2	3	3	0
BW	Mesomora	C. controversa	6	9	4.3871	4.96774	4.06452	0.883117	1.22222	8	75	2.90196	2.86275	1	1	0	0	2	3	3	0
BW	Mesomora	C. controversa	6	9	4.64516	4.83871	3.74194	0.96	1.2931	8	87.5	3.13725	2.54902	1	1	0	0	2	3	3	0
BW	Mesomora	C. controversa	6	9	3.6129	5.22581	4.3871	0.691358	1.19118	7	85.7143	3.13725	2.7451	1	1	0	0	2	3	3	0
BW	Mesomora	C. controversa	6	9	4.3871	5.22581	4.32258	0.839506	1.20896	7	71.4286	2.94118	3.13725	1	1	0	0	2	3	3	0
BW	Mesomora	C. controversa	6	9	4.19355	4.64516	3.74194	0.902778	1.24138	8	75	2.82353	2.62745	1	1	0	0	2	3	3	0
BW	Mesomora	C. controversa	6	9	3.93548	4.64516	3.6129	0.847222	1.28571	8	75	2.7451	2.47059	1	1	0	0	2	3	3	0
BW	Mesomora	C. controversa	6	9	3.93548	4.83871	4.12903	0.813333	1.17188	6	100	2.90196	2.94118	1	1	0	0	2	3	3	0
BW	Mesomora	C. controversa	6	9	4.58065	5.35484	4.06452	0.855422	1.31746	6	100	3.13725	2.94118	1	1	0	0	2	3	3	0
BW	Mesomora	C. controversa	6	9	4.58065	4.90323	4.19355	0.934211	1.16923	7	85.7143	3.01961	2.94118	1	1	0	0	2	3	3	0
BW	Mesomora	C. controversa	6	9	4.45161	5.03226	3.93548	0.884615	1.27869	7	71.4286	2.98039	2.90196	1	1	0	0	2	3	3	0
BW	Mesomora	C. controversa	6	9	4.12903	5.09677	4.12903	0.810127	1.23438	7	85.7143	3.13725	2.98039	1	1	0	0	2	3	3	0
BW	Mesomora	C. controversa	6	9	4	4.96774	4.3871	0.805195	1.13235	8	100	3.13725	2.86275	1	1	0	0	2	3	3	0
BW	Mesomora	C. controversa	6	9	3.93548	4.51613	3.93548	0.871429	1.14754	6	100	2.47059	2.58824	1	1	0	0	2	3	3	0
BW	Mesomora	C. controversa	6	9	4.25806	5.29032	4	0.804878	1.32258	7	71.4286	3.21569	3.01961	1	1	0	0	2	3	3	0
BW	Mesomora	C. controversa	6	9	5.09677	5.03226	3.93548	1.01282	1.27869	6	83.3333	2.86275	3.13725	1	1	0	0	2	3	3	0
BW	Mesomora	C. controversa	6	9	4.32258	5.22581	4	0.82716	1.30645	8	75	2.94118	3.01961	1	1	0	0	2	3	3	0
BW	Mesomora	C. controversa	6	9	4.45161	5.09677	4.06452	0.873418	1.25397	6	100	2.7451	2.47059	1	1	0	0	2	3	3	0
BW	Mesomora	C. controversa	6	9	4.3871	5.16129	4.12903	0.85	1.25	7	71.4286	3.13725	2.94118	1	1	0	0	2	3	3	0
BW	Mesomora	C. controversa	6	9	4.3871	4.96774	4.12903	0.883117	1.20312	7	100	2.66667	2.82353	1	1	0	0	2	3	3	0
BW	Mesomora	C. controversa	6	9	4.19355	5.03226	3.93548	0.833333	1.27869	7	85.7143	2.94118	2.7451	1	1	0	0	2	3	3	0
BW	Mesomora	C. controversa	6	9	3.80645	4.70968	3.74194	0.808219	1.25862	6	100	2.70588	2.43137	1	1	0	0	2	3	3	0
BW	Mesomora	C. controversa	6	9	3.87097	4.32258	3.48387	0.895522	1.24074	7	100	2.7451	2.47059	1	1	0	0	2	3	3	0
BW	Mesomora	C. controversa	6	9	4.25806	5.29032	4.3871	0.804878	1.20588	8	75	3.4902	3.01961	1	1	0	0	2	3	3	0
BW	Mesomora	C. controversa	6	10	3.48387	4.70968	4.19355	0.739726	1.12308	8	100	3.05882	2.23529	1	1	0	0	0	3	2	0
BW	Mesomora	C. controversa	6	10	4.51613	5.87097	4.45161	0.769231	1.31884	7	71.4286	3.64706	2.7451	1	1	0	0	1	3	2	0
BW	Mesomora	C. controversa	6	10	4.06452	5.48387	4.90323	0.741176	1.11842	7	100	2.90196	2.7451	1	1	0	0	0	3	2	0
BW	Mesomora	C. controversa	6	10	4.32258	4.96774	4.3871	0.87013	1.13235	6	83.3333	3.80392	2.94118	1	1	0	0	0	3	2	0
BW	Mesomora	C. controversa	6	10	5.16129	5.48387	4.64516	0.941176	1.18056	6	100	3.33333	2.70588	1	1	0	0	1	3	2	0
BW	Mesomora	C. controversa	6	10	4.64516	6	5.29032	0.774194	1.13415	8	62.5	2.70588	2.58824	1	1	0	0	0	3	2	0
BW	Mesomora	C. controversa	6	10	4.77419	5.74194	4.25806	0.831461	1.34848	6	66.6667	3.17647	2.54902	1	1	0	0	1	3	2	0
BW	Mesomora	C. controversa	6	10	4.90323	5.22581	4.51613	0.938272	1.15714	7	57.1429	2.7451	2.54902	1	1	0	0	1	3	2	0
BW	Mesomora	C. controversa	6	10	4.19355	5.03226	4	0.833333	1.25806	7	85.7143	3.13725	2.70588	1	1	0	0	1	3	2	0
BW	Mesomora	C. controversa	6	10	4.58065	5.48387	4.96774	0.835294	1.1039	8	87.5	2.7451	2.35294	1	1	0	0	0	3	2	0
BW	Mesomora	C. controversa	6	10	4.45161	5.16129	4.51613	0.8625	1.14286	8	100	2.35294	2	1	1	0	0	0	3	2	0
BW	Mesomora	C. controversa	6	10	4.32258	5.67742	5.09677	0.761364	1.11392	8	87.5	2.98039	2.94118	1	1	0	0	0	3	2	0
BW	Mesomora	C. controversa	6	10	4.3871	6	5.22581	0.731183	1.14815	8	87.5	3.13725	3.05882	1	1	0	0	0	3	2	0
BW	Mesomora	C. controversa	6	10	4	5.22581	4.58065	0.765432	1.14085	6	83.3333	3.01961	2.82353	1	1	0	0	0	3	2	0
BW	Mesomora	C. controversa	6	10	3.22581	4.51613	4.06452	0.714286	1.11111	8	87.5	3.05882	2.35294	1	1	0	0	0	3	2	0
BW	Mesomora	C. controversa	6	10	4.51613	5.67742	4.96774	0.795455	1.14286	8	87.5	3.13725	2.98039	1	1	0	0	0	3	2	0
BW	Mesomora	C. controversa	6	10	4	5.09677	4.58065	0.78481	1.11268	8	87.5	2.94118	2.35294	1	1	0	0	1	3	2	0
BW	Mesomora	C. controversa	6	10	4.19355	5.41935	4.83871	0.77381	1.12	8	87.5	1.84314	2.78431	1	1	0	0	0	3	2	0
BW	Mesomora	C. controversa	6	10	4.64516	6	5.09677	0.774194	1.17722	8	62.5	2.82353	2.43137	1	1	0	0	1	3	2	0
BW	Mesomora	C. controversa	6	10	4.32258	5.6129	4.70968	0.770115	1.19178	8	75	2.86275	2.7451	1	1	0	0	1	3	2	0
BW	Mesomora	C. controversa	6	10	4.45161	5.22581	4.64516	0.851852	1.125	8	75	3.13725	2.7451	1	1	0	0	0	3	2	0
BW	Mesomora	C. controversa	6	10	3.74194	4.83871	4.51613	0.773333	1.07143	8	87.5	2.35294	2.43137	1	1	0	0	0	3	2	0
BW	Mesomora	C. controversa	6	10	3.6129	5.03226	4.3871	0.717949	1.14706	8	87.5	2.7451	2.15686	1	1	0	0	0	3	2	0
BW	Mesomora	C. controversa	6	10	4.06452	5.09677	4.64516	0.797468	1.09722	8	62.5	2.7451	2.47059	1	1	0	0	0	3	2	0
BW	Mesomora	C. controversa	6	10	3.67742	4.51613	4.12903	0.814286	1.09375	8	75	3.09804	2.31373	1	1	0	0	0	3	2	0
BW	Mesomora	C. controversa	6	10	4.06452	4.96774	4.19355	0.818182	1.18462	8	75	2.54902	2.54902	1	1	0	0	1	3	2	0
BW	Mesomora	C. controversa	6	10	3.35484	4.70968	4.25806	0.712329	1.10606	7	85.7143	2.7451	2.27451	1	1	0	0	1	3	2	0
BW	Mesomora	C. controversa	6	10	3.6129	4.64516	3.87097	0.777778	1.2	5	100	2.54902	2.19608	1	1	0	0	1	3	2	0
BW	Mesomora	C. controversa	6	10	4.12903	5.16129	4.45161	0.8	1.15942	7	100	2.35294	2.62745	1	1	0	0	1	3	2	0
BW	Mesomora	C. controversa	6	10	3.80645	5.09677	4.12903	0.746835	1.23438	8	87.5	3.09804	2.15686	1	1	0	0	1	3	2	0
BW	Mesomora	C. controversa	6	11	5.48387	6.06452	4.96774	0.904255	1.22078	9	55.5556	1.88235	2.66667	1	1	1	0	1	3	2	0
BW	Mesomora	C. controversa	6	11	5.35484	6	5.16129	0.892473	1.1625	7	85.7143	2.15686	2.54902	1	1	1	0	1	3	2	0
BW	Mesomora	C. controversa	6	11	5.16129	5.35484	4.32258	0.963855	1.23881	8	100	1.52941	2.43137	1	1	1	0	1	3	2	0
BW	Mesomora	C. controversa	6	11	5.87097	6.12903	4.96774	0.957895	1.23377	8	100	2.03922	2.62745	1	1	1	0	1	3	2	0
BW	Mesomora	C. controversa	6	11	4.58065	5.41935	4.3871	0.845238	1.23529	8	100	1.60784	1.84314	1	1	1	0	1	3	2	0
BW	Mesomora	C. controversa	6	11	4.64516	5.54839	3.93548	0.837209	1.40984	8	100	1.76471	1.80392	1	1	1	0	1	3	2	0
BW	Mesomora	C. controversa	6	11	4.70968	5.35484	4.64516	0.879518	1.15278	8	100	2.35294	2.23529	1	1	1	0	1	3	2	0
BW	Mesomora	C. controversa	6	11	5.16129	6.06452	5.03226	0.851064	1.20513	8	75	2.23529	2.35294	1	1	1	0	1	3	2	0
BW	Mesomora	C. controversa	6	11	4.51613	5.03226	4.3871	0.897436	1.14706	8	87.5	1.88235	2.15686	1	1	1	0	1	3	2	0
BW	Mesomora	C. controversa	6	11	4.96774	5.35484	4.51613	0.927711	1.18571	7	100	2.70588	2.62745	1	1	1	0	1	3	2	0
BW	Mesomora	C. controversa	6	11	5.41935	5.87097	5.03226	0.923077	1.16667	8	100	2.15686	2.39216	1	1	1	0	1	3	2	0
BW	Mesomora	C. controversa	6	11	5.03226	5.87097	4.96774	0.857143	1.18182	8	87.5	2.35294	2.58824	1	1	1	0	1	3	2	0
BW	Mesomora	C. controversa	6	11	4.70968	5.09677	4.45161	0.924051	1.14493	9	88.8889	1.37255	2.15686	1	1	1	0	1	3	2	0
BW	Mesomora	C. controversa	6	11	4.83871	5.67742	4.58065	0.852273	1.23944	8	100	2.54902	2.43137	1	1	1	0	1	3	2	0
BW	Mesomora	C. controversa	6	11	4.83871	5.67742	4.58065	0.852273	1.23944	8	75	1.41176	2.43137	1	1	1	0	1	3	2	0
BW	Mesomora	C. controversa	6	11	4.96774	5.35484	4.3871	0.927711	1.22059	8	87.5	1.56863	2.39216	1	1	1	0	1	3	2	0
BW	Mesomora	C. controversa	6	11	5.35484	6	5.03226	0.892473	1.19231	7	100	3.13725	2.03922	1	1	1	0	1	3	2	0
BW	Mesomora	C. controversa	6	11	5.03226	6	4.90323	0.83871	1.22368	8	87.5	2.23529	2.27451	1	1	1	0	1	3	2	0
BW	Mesomora	C. controversa	6	11	5.29032	5.54839	4.51613	0.953488	1.22857	7	71.4286	2.35294	2.35294	1	1	1	0	1	3	2	0
BW	Mesomora	C. controversa	6	11	5.29032	5.67742	4.83871	0.931818	1.17333	9	77.7778	2.7451	2.66667	1	1	1	0	1	3	2	0
BW	Mesomora	C. controversa	6	11	4.96774	5.74194	5.03226	0.865169	1.14103	8	87.5	3.13725	2.90196	1	1	1	0	1	3	2	0
BW	Mesomora	C. controversa	6	11	4.96774	6	5.09677	0.827957	1.17722	8	75	2.35294	2.7451	1	1	1	0	1	3	2	0
BW	Mesomora	C. controversa	6	11	4.96774	5.74194	4.70968	0.865169	1.21918	8	75	2.19608	2.35294	1	1	1	0	1	3	2	0
BW	Mesomora	C. controversa	6	11	5.22581	5.74194	4.58065	0.910112	1.25352	7	85.7143	2.54902	2.66667	1	1	1	0	1	3	2	0
BW	Mesomora	C. controversa	6	11	4.96774	5.74194	4.90323	0.865169	1.17105	7	100	2.43137	2.15686	1	1	1	0	1	3	2	0
BW	Mesomora	C. controversa	6	11	4.83871	5.35484	4.83871	0.903614	1.10667	8	75	2.35294	2.43137	1	1	1	0	1	3	2	0
BW	Mesomora	C. controversa	6	11	4.83871	5.41935	4.70968	0.892857	1.15068	8	100	1.72549	2.23529	1	1	1	0	1	3	2	0
BW	Mesomora	C. controversa	6	11	4.25806	5.54839	4.58065	0.767442	1.21127	8	100	2.43137	2.62745	1	1	1	0	1	3	2	0
BW	Mesomora	C. controversa	6	11	4.70968	5.67742	4.83871	0.829545	1.17333	8	75	2.27451	2.7451	1	1	1	0	1	3	2	0
BW	Mesomora	C. controversa	6	11	4.32258	5.54839	4.83871	0.77907	1.14667	8	100	2.39216	2.23529	1	1	1	0	1	3	2	0
BW	Mesomora	C. controversa	6	12	4.77419	4.70968	4.06452	1.0137	1.15873	8	100	2.07843	2.62745	1	1	0	0	1	3	2	0
BW	Mesomora	C. controversa	6	12	5.29032	5.48387	4.64516	0.964706	1.18056	9	77.7778	1.80392	2.43137	1	1	0	0	1	3	2	0
BW	Mesomora	C. controversa	6	12	4.64516	5.09677	4.3871	0.911392	1.16176	8	87.5	1.96078	2.7451	1	1	0	0	1	3	2	0
BW	Mesomora	C. controversa	6	12	4.96774	5.74194	4.51613	0.865169	1.27143	8	100	1.72549	2.98039	1	1	0	0	1	3	2	0
BW	Mesomora	C. controversa	6	12	5.48387	5.41935	4.64516	1.0119	1.16667	8	100	2.07843	3.33333	1	1	0	0	1	3	2	0
BW	Mesomora	C. controversa	6	12	4.58065	4.96774	4.45161	0.922078	1.11594	8	100	2.27451	2.62745	1	1	0	0	1	3	2	0
BW	Mesomora	C. controversa	6	12	4.58065	4.64516	4.25806	0.986111	1.09091	8	100	2.19608	3.09804	1	1	0	0	1	3	2	0
BW	Mesomora	C. controversa	6	12	4.25806	3.67742	3.22581	1.15789	1.14	8	100	1.17647	2.03922	1	1	0	0	1	3	2	0
BW	Mesomora	C. controversa	6	12	3.6129	4.12903	2.77419	0.875	1.48837	9	88.8889	1.96078	2.07843	1	1	0	0	1	3	2	0
BW	Mesomora	C. controversa	6	12	5.16129	5.54839	4.77419	0.930233	1.16216	8	87.5	1.72549	3.01961	1	1	0	0	1	3	2	0
BW	Mesomora	C. controversa	6	12	4.64516	5.03226	4.25806	0.923077	1.18182	7	85.7143	2.19608	2.5098	1	1	0	0	1	3	2	0
BW	Mesomora	C. controversa	6	12	5.03226	4.64516	4.19355	1.08333	1.10769	7	100	1.68627	2.43137	1	1	0	0	1	3	2	0
BW	Mesomora	C. controversa	6	12	4.96774	4.96774	4	1	1.24194	8	75	1.96078	2.5098	1	1	0	0	1	3	2	0
BW	Mesomora	C. controversa	6	12	5.16129	4.90323	4.3871	1.05263	1.11765	6	100	2.31373	2.54902	1	1	0	0	1	3	2	0
BW	Mesomora	C. controversa	6	12	3.54839	3.74194	3.22581	0.948276	1.16	7	85.7143	1.84314	2.15686	1	1	0	0	1	3	2	0
BW	Mesomora	C. controversa	6	12	4.25806	4.06452	3.41935	1.04762	1.18868	7	85.7143	1.88235	1.84314	1	1	0	0	1	3	3	0
BW	Mesomora	C. controversa	6	12	4.25806	4.83871	4	0.88	1.20968	7	100	1.60784	2.66667	1	1	0	0	1	3	2	0
BW	Mesomora	C. controversa	6	12	3.22581	3.22581	3.09677	1	1.04167	6	83.3333	1.52941	2.11765	1	1	0	0	1	3	2	0
BW	Mesomora	C. controversa	6	12	4.96774	4.83871	3.80645	1.02667	1.27119	8	87.5	1.72549	2.23529	1	1	0	0	1	3	2	0
BW	Mesomora	C. controversa	6	12	5.09677	4.90323	4	1.03947	1.22581	8	87.5	1.88235	2.54902	1	1	0	0	1	3	2	0
BW	Mesomora	C. controversa	6	12	4.51613	4.77419	3.80645	0.945946	1.25424	8	75	2.19608	2.47059	1	1	0	0	1	3	2	0
BW	Mesomora	C. controversa	6	12	4.25806	4.77419	4.19355	0.891892	1.13846	8	75	1.72549	2.82353	1	1	0	0	1	3	2	0
BW	Mesomora	C. controversa	6	12	4.3871	4.58065	3.80645	0.957746	1.20339	7	100	1.96078	2.27451	1	1	0	0	1	3	2	0
BW	Mesomora	C. controversa	6	12	4.3871	4.58065	3.48387	0.957746	1.31481	7	100	2.27451	2.58824	1	1	0	0	1	3	2	0
BW	Mesomora	C. controversa	6	12	3.87097	4.32258	3.80645	0.895522	1.13559	8	75	1.64706	2.43137	1	1	0	0	1	3	2	0
BW	Mesomora	C. controversa	6	12	4.51613	4.51613	3.67742	1	1.22807	8	75	1.68627	2.19608	1	1	0	0	1	3	2	0
BW	Mesomora	C. controversa	6	12	3.74194	3.87097	3.22581	0.966667	1.2	8	100	1.60784	2	1	1	0	0	1	3	2	0
BW	Mesomora	C. controversa	6	12	3.35484	3.74194	3.35484	0.896552	1.11538	8	87.5	1.4902	1.96078	1	1	0	0	1	3	2	0
BW	Mesomora	C. controversa	6	12	4.32258	4.32258	3.54839	1	1.21818	8	87.5	1.56863	2	1	1	0	0	1	3	2	0
BW	Mesomora	C. controversa	6	12	3.93548	4	3.41935	0.983871	1.16981	8	87.5	1.64706	2.35294	1	1	0	0	1	3	2	0
BW	Mesomora	C. controversa	6	13	4.96774	5.29032	4.12903	0.939024	1.28125	8	50	2.11765	2.27451	1	1	1	1	1	3	2	0
BW	Mesomora	C. controversa	6	13	4.3871	5.48387	4.12903	0.8	1.32812	7	85.7143	2.35294	1.96078	1	1	1	1	1	3	2	0
BW	Mesomora	C. controversa	6	13	4.58065	5.16129	4.25806	0.8875	1.21212	8	75	2.07843	2.27451	1	1	1	1	1	3	2	0
BW	Mesomora	C. controversa	6	13	5.03226	5.41935	4.51613	0.928571	1.2	8	75	2.19608	2.54902	1	1	1	0	1	3	2	0
BW	Mesomora	C. controversa	6	13	5.03226	4.96774	3.87097	1.01299	1.28333	9	77.7778	2.98039	2.54902	1	1	1	0	1	3	2	0
BW	Mesomora	C. controversa	6	13	4.64516	5.03226	3.87097	0.923077	1.3	8	87.5	2.94118	2.54902	1	1	1	0	1	3	2	0
BW	Mesomora	C. controversa	6	13	4.64516	5.35484	4.51613	0.86747	1.18571	8	50	1.76471	2.19608	1	1	1	1	1	3	2	0
BW	Mesomora	C. controversa	6	13	4.51613	5.41935	4.3871	0.833333	1.23529	8	75	1.96078	2.35294	1	1	1	1	1	3	2	0
BW	Mesomora	C. controversa	6	13	4.83871	5.35484	4.32258	0.903614	1.23881	9	77.7778	2.35294	2.7451	1	1	1	0	1	3	2	0
BW	Mesomora	C. controversa	6	13	4.58065	6	4.58065	0.763441	1.30986	8	50	1.96078	2.54902	1	1	1	0	1	3	2	0
BW	Mesomora	C. controversa	6	13	4.90323	5.41935	4.32258	0.904762	1.25373	8	75	2.7451	3.13725	1	1	1	0	1	3	2	0
BW	Mesomora	C. controversa	6	13	4.77419	5.6129	4.45161	0.850575	1.26087	9	66.6667	2.43137	2.39216	1	1	1	0	1	3	2	0
BW	Mesomora	C. controversa	6	13	4.19355	5.09677	3.80645	0.822785	1.33898	8	75	2.35294	1.92157	1	1	1	0	1	3	2	0
BW	Mesomora	C. controversa	6	13	4.64516	5.41935	3.93548	0.857143	1.37705	8	62.5	2.27451	2.35294	1	1	1	0	1	3	2	0
BW	Mesomora	C. controversa	6	13	4.25806	5.67742	4.51613	0.75	1.25714	8	87.5	2.03922	1.92157	1	1	1	1	1	3	2	0
BW	Mesomora	C. controversa	6	13	3.93548	5.03226	4.3871	0.782051	1.14706	8	75	1.96078	1.84314	1	1	1	0	1	3	2	0
BW	Mesomora	C. controversa	6	13	4.45161	5.16129	3.93548	0.8625	1.31148	7	71.4286	2.07843	1.96078	1	1	1	1	1	3	2	0
BW	Mesomora	C. controversa	6	13	4.12903	5.09677	4.12903	0.810127	1.23438	8	62.5	2.47059	2.07843	1	1	1	0	1	3	2	0
BW	Mesomora	C. controversa	6	13	4.64516	5.48387	4.32258	0.847059	1.26866	8	62.5	2.35294	2.43137	1	1	1	1	1	3	2	0
BW	Mesomora	C. controversa	6	13	4.3871	5.74194	4.51613	0.764045	1.27143	8	87.5	2.7451	2.27451	1	1	1	1	1	3	2	0
BW	Mesomora	C. controversa	6	13	4.51613	5.35484	3.87097	0.843373	1.38333	8	62.5	2.35294	2.27451	1	1	1	0	1	3	2	0
BW	Mesomora	C. controversa	6	13	4.25806	5.29032	4.3871	0.804878	1.20588	8	87.5	1.33333	2.11765	1	1	1	1	1	3	2	0
BW	Mesomora	C. controversa	6	13	4.3871	5.03226	3.74194	0.871795	1.34483	8	62.5	2.35294	2	1	1	1	0	1	3	2	0
BW	Mesomora	C. controversa	6	13	4.45161	4.77419	4	0.932432	1.19355	8	75	0	0	1	0	1	1	1	3	2	0
BW	Mesomora	C. controversa	6	13	4	4.96774	3.74194	0.805195	1.32759	8	75	2.7451	1.80392	1	1	1	1	1	3	2	0
BW	Mesomora	C. controversa	6	13	4.32258	5.16129	4	0.8375	1.29032	8	75	2.35294	1.96078	1	1	1	0	1	3	2	0
BW	Mesomora	C. controversa	6	13	4.25806	5.29032	3.93548	0.804878	1.34426	7	71.4286	2.7451	1.96078	1	1	1	0	1	3	2	0
BW	Mesomora	C. controversa	6	13	4.19355	4.83871	4.12903	0.866667	1.17188	8	87.5	1.96078	2.27451	1	1	1	1	1	3	2	0
BW	Mesomora	C. controversa	6	13	4.19355	4.70968	3.93548	0.890411	1.19672	8	50	2.94118	2.03922	1	1	1	0	1	3	2	0
BW	Mesomora	C. controversa	6	13	4.3871	4.90323	4.32258	0.894737	1.13433	8	50	2.15686	2.39216	1	1	1	1	1	3	2	0
BW	Mesomora	C. controversa	6	14	6.70968	5.16129	3.67742	1.3	1.40351	8	87.5	2.43137	2.70588	1	1	0	0	1	3	3	0
BW	Mesomora	C. controversa	6	14	5.93548	4.96774	4.06452	1.19481	1.22222	7	71.4286	2.78431	2.70588	1	1	0	0	1	3	3	0
BW	Mesomora	C. controversa	6	14	6.90323	5.80645	4.12903	1.18889	1.40625	8	62.5	3.96078	2.66667	1	1	0	0	1	3	3	0
BW	Mesomora	C. controversa	6	14	7.03226	5.93548	4.77419	1.18478	1.24324	8	75	2.7451	3.21569	1	1	0	0	1	3	3	0
BW	Mesomora	C. controversa	6	14	6.51613	5.48387	4.19355	1.18824	1.30769	7	100	3.76471	3.29412	1	1	0	0	1	3	3	0
BW	Mesomora	C. controversa	6	14	6.83871	5.29032	3.93548	1.29268	1.34426	8	62.5	2.82353	3.05882	1	1	0	0	1	3	3	0
BW	Mesomora	C. controversa	6	14	7.22581	5.87097	4.51613	1.23077	1.3	8	100	3.13725	3.41176	1	1	0	0	1	3	3	0
BW	Mesomora	C. controversa	6	14	6.96774	5.09677	4	1.36709	1.27419	8	50	3.05882	3.01961	1	1	0	0	1	3	3	0
BW	Mesomora	C. controversa	6	14	6.58065	5.16129	4.25806	1.275	1.21212	7	71.4286	3.01961	2.82353	1	1	0	0	1	3	3	0
BW	Mesomora	C. controversa	6	14	6.3871	5.22581	4.12903	1.22222	1.26562	8	75	2.58824	3.01961	1	1	0	0	1	3	3	0
BW	Mesomora	C. controversa	6	14	6.70968	5.54839	4.32258	1.2093	1.28358	8	87.5	3.33333	2.98039	1	1	0	0	1	3	3	0
BW	Mesomora	C. controversa	6	14	6.64516	5.22581	3.93548	1.2716	1.32787	8	87.5	3.05882	2.70588	1	1	0	0	1	3	3	0
BW	Mesomora	C. controversa	6	14	6.32258	5.22581	4.32258	1.20988	1.20896	8	100	3.4902	3.09804	1	1	0	0	1	3	3	0
BW	Mesomora	C. controversa	6	14	6.3871	5.09677	3.6129	1.25316	1.41071	7	85.7143	2.82353	2.54902	1	1	0	0	1	3	3	0
BW	Mesomora	C. controversa	6	14	6.58065	4.96774	3.87097	1.32468	1.28333	8	75	3.2549	2.98039	1	1	0	0	1	3	3	0
BW	Mesomora	C. controversa	6	14	8	5.22581	4.32258	1.53086	1.20896	7	71.4286	2.98039	3.41176	1	1	0	0	1	3	2	0
BW	Mesomora	C. controversa	6	14	6.45161	5.03226	3.80645	1.28205	1.32203	7	100	2.78431	2.70588	1	1	0	0	1	3	3	0
BW	Mesomora	C. controversa	6	14	6.51613	5.48387	4	1.18824	1.37097	8	75	3.17647	2.82353	1	1	0	0	1	3	3	0
BW	Mesomora	C. controversa	6	14	6.64516	4.64516	3.87097	1.43056	1.2	8	62.5	3.13725	2.94118	1	1	0	0	1	3	3	0
BW	Mesomora	C. controversa	6	14	7.29032	5.09677	3.74194	1.43038	1.36207	8	75	3.13725	2.82353	1	1	0	0	1	3	3	0
BW	Mesomora	C. controversa	6	14	6.25806	4.77419	3.29032	1.31081	1.45098	8	75	3.01961	2.86275	1	1	0	0	1	3	3	0
BW	Mesomora	C. controversa	6	14	6.45161	5.09677	4.32258	1.26582	1.1791	8	87.5	3.33333	2.70588	1	1	0	0	1	3	3	0
BW	Mesomora	C. controversa	6	14	5.93548	5.16129	3.54839	1.15	1.45455	8	62.5	2.7451	2.58824	1	1	0	0	1	3	3	0
BW	Mesomora	C. controversa	6	14	6.51613	5.09677	3.74194	1.27848	1.36207	7	100	3.13725	2.62745	1	1	0	0	1	3	3	0
BW	Mesomora	C. controversa	6	14	6.90323	5.16129	3.87097	1.3375	1.33333	8	87.5	2.82353	2.58824	1	1	0	0	1	3	3	0
BW	Mesomora	C. controversa	6	14	6.64516	5.48387	3.87097	1.21176	1.41667	8	100	2.90196	2.07843	1	1	0	0	1	3	3	0
BW	Mesomora	C. controversa	6	14	5.87097	5.16129	3.93548	1.1375	1.31148	7	85.7143	3.29412	2.66667	1	1	0	0	1	3	3	0
BW	Mesomora	C. controversa	6	14	5.80645	5.35484	4.45161	1.08434	1.2029	8	87.5	3.13725	3.13725	1	1	0	0	1	3	3	0
BW	Mesomora	C. controversa	6	14	6.77419	5.6129	4.06452	1.2069	1.38095	8	75	3.33333	3.05882	1	1	0	0	1	3	3	0
BW	Mesomora	C. controversa	6	14	6.12903	5.54839	3.80645	1.10465	1.45763	8	100	1.01961	1.29412	1	1	0	0	1	3	3	0
BW	Kraniopsis	C. drummondii	7	1	4.58065	4.90323	3.54839	0.934211	1.38182	8	50	0	0	1	0	0	1	1	3	2	1
BW	Kraniopsis	C. drummondii	7	1	4.70968	4.77419	3.54839	0.986486	1.34545	9	22.2222	0	0	1	0	0	1	1	3	2	1
BW	Kraniopsis	C. drummondii	7	1	4.3871	4.51613	3.6129	0.971429	1.25	8	62.5	0	0	1	0	0	0	1	3	2	1
BW	Kraniopsis	C. drummondii	7	1	4.51613	4.51613	3.48387	1	1.2963	7	42.8571	0	0	1	0	0	0	1	3	2	1
BW	Kraniopsis	C. drummondii	7	1	4.3871	4.83871	3.67742	0.906667	1.31579	8	62.5	0	0	1	0	0	0	1	3	2	1
BW	Kraniopsis	C. drummondii	7	2	4.32258	4.32258	3.48387	1	1.24074	8	0	0	0	0	0	0	0	1	3	2	1
BW	Kraniopsis	C. drummondii	7	2	4.06452	4.32258	3.41935	0.940299	1.26415	9	11.1111	0	0	1	0	0	0	1	3	2	1
BW	Kraniopsis	C. drummondii	7	2	4.25806	4.06452	3.41935	1.04762	1.18868	8	0	0	0	0	0	0	0	1	3	2	1
BW	Kraniopsis	C. drummondii	7	2	4.32258	4.19355	3.29032	1.03077	1.27451	8	0	0	0	0	0	0	0	1	3	2	1
BW	Kraniopsis	C. drummondii	7	3	3.6129	4.45161	3.35484	0.811594	1.32692	8	50	0	0	1	0	0	0	1	3	2	1
BW	Kraniopsis	C. drummondii	7	3	3.6129	4.12903	3.22581	0.875	1.28	8	0	0	0	0	0	0	0	1	3	2	1
BW	Kraniopsis	C. drummondii	7	3	3.6129	4.32258	3.41935	0.835821	1.26415	8	50	0	0	1	0	0	0	1	3	2	1
BW	Kraniopsis	C. drummondii	7	3	3.48387	4.12903	3.29032	0.84375	1.2549	9	33.3333	0	0	1	0	0	0	1	3	2	1
BW	Kraniopsis	C. drummondii	7	3	3.48387	4.12903	3.29032	0.84375	1.2549	8	37.5	0	0	1	0	0	0	1	3	2	1
BW	Kraniopsis	C. drummondii	7	4	3.87097	3.80645	2.90323	1.01695	1.31111	8	0	0	0	0	0	0	0	1	3	3	1
BW	Kraniopsis	C. drummondii	7	4	3.48387	3.6129	2.70968	0.964286	1.33333	8	50	0	0	1	0	0	0	1	3	2	1
BW	Kraniopsis	C. drummondii	7	4	4.19355	3.87097	3.22581	1.08333	1.2	8	37.5	0	0	1	0	0	0	1	3	3	1
BW	Kraniopsis	C. drummondii	7	4	4.06452	3.80645	2.96774	1.0678	1.28261	8	75	0	0	1	0	0	0	1	3	0	1
BW	Kraniopsis	C. drummondii	7	4	4.25806	3.67742	3.35484	1.15789	1.09615	8	62.5	0	0	1	0	0	0	1	3	3	1
BW	Kraniopsis	C. drummondii	7	4	3.35484	3.87097	2.90323	0.866667	1.33333	8	50	0	0	1	0	0	0	1	3	2	1
BW	Kraniopsis	C. drummondii	7	5	3.87097	4.12903	3.67742	0.9375	1.12281	8	37.5	0	0	1	0	0	0	1	3	2	1
BW	Kraniopsis	C. drummondii	7	5	3.6129	4.06452	3.67742	0.888889	1.10526	8	0	0	0	0	0	0	0	1	3	2	1
BW	Kraniopsis	C. drummondii	7	5	3.87097	4.3871	3.67742	0.882353	1.19298	8	25	0	0	1	0	0	0	1	3	2	1
BW	Kraniopsis	C. drummondii	7	5	3.93548	4.32258	3.6129	0.910448	1.19643	8	0	0	0	0	0	0	0	1	3	0	1
BW	Kraniopsis	C. drummondii	7	5	3.74194	4.32258	3.6129	0.865672	1.19643	8	37.5	0	0	1	0	0	0	1	3	3	1
BW	Kraniopsis	C. drummondii	7	6	3.54839	3.22581	2.90323	1.1	1.11111	8	0	0.470588	0.54902	0	1	0	0	0	3	0	1
BW	Kraniopsis	C. drummondii	7	6	4.19355	3.87097	3.29032	1.08333	1.17647	8	0	0	0	0	0	0	0	1	3	0	1
BW	Kraniopsis	C. drummondii	7	6	3.74194	3.54839	3.03226	1.05455	1.17021	8	12.5	0	0	1	0	0	0	1	3	0	1
BW	Kraniopsis	C. drummondii	7	6	3.67742	3.54839	2.96774	1.03636	1.19565	8	12.5	0	0	1	0	0	0	1	3	0	1
BW	Kraniopsis	C. drummondii	7	6	3.6129	3.35484	2.83871	1.07692	1.18182	8	12.5	0.627451	0.470588	1	1	0	0	1	3	2	1
BW	Kraniopsis	C. drummondii	7	7	4.32258	4.51613	3.29032	0.957143	1.37255	7	28.5714	0	0	1	0	0	1	2	3	3	1
BW	Kraniopsis	C. drummondii	7	7	4.77419	4.51613	3.29032	1.05714	1.37255	8	12.5	0	0	1	0	0	1	2	3	3	1
BW	Kraniopsis	C. drummondii	7	7	3.67742	4.70968	3.74194	0.780822	1.25862	7	14.2857	0	0	1	0	0	1	2	3	3	1
BW	Kraniopsis	C. drummondii	7	7	4.32258	4.3871	3.41935	0.985294	1.28302	7	0	0	0	0	0	0	1	2	3	3	1
BW	Kraniopsis	C. drummondii	7	7	4.77419	4.32258	3.67742	1.10448	1.17544	6	33.3333	0	0	1	0	0	1	2	3	3	1
BW	Kraniopsis	C. drummondii	7	7	4.64516	4	3.16129	1.16129	1.26531	7	14.2857	0	0	1	0	0	1	2	3	3	1
BW	Kraniopsis	C. drummondii	7	7	4.12903	4.32258	3.80645	0.955224	1.13559	7	28.5714	0	0	1	0	0	1	2	3	3	1
BW	Kraniopsis	C. drummondii	7	7	4.45161	4.32258	3.41935	1.02985	1.26415	7	14.2857	0	0	1	0	0	1	2	3	3	1
BW	Kraniopsis	C. drummondii	7	7	4.06452	4.58065	3.48387	0.887324	1.31481	8	0	0	0	0	0	0	1	2	3	3	1
BW	Kraniopsis	C. drummondii	7	7	4.25806	4.58065	3.41935	0.929577	1.33962	7	0	0	0	0	0	0	1	2	3	3	1
BW	Kraniopsis	C. drummondii	7	7	4.32258	4.70968	3.6129	0.917808	1.30357	8	0	0	0	0	0	0	1	2	3	3	1
BW	Kraniopsis	C. drummondii	7	7	4.32258	4.19355	3.54839	1.03077	1.18182	7	42.8571	0	0	1	0	0	1	2	3	3	1
BW	Kraniopsis	C. drummondii	7	7	4.25806	4.32258	3.16129	0.985075	1.36735	6	16.6667	0	0	1	0	0	1	2	3	3	1
BW	Kraniopsis	C. drummondii	7	7	3.87097	4.25806	3.48387	0.909091	1.22222	6	0	0	0	0	0	0	1	2	3	2	1
BW	Kraniopsis	C. drummondii	7	7	4.19355	4.64516	3.67742	0.902778	1.26316	7	28.5714	0	0	1	0	0	1	2	3	2	1
BW	Kraniopsis	C. drummondii	7	7	4.58065	4.45161	3.41935	1.02899	1.30189	7	0	0	0	0	0	0	1	2	3	3	1
BW	Kraniopsis	C. drummondii	7	7	4.19355	4.32258	3.67742	0.970149	1.17544	6	0	0	0	0	0	0	1	2	3	3	1
BW	Kraniopsis	C. drummondii	7	7	4.25806	3.93548	3.22581	1.08197	1.22	7	0	0	0	0	0	0	1	2	3	3	1
BW	Kraniopsis	C. drummondii	7	7	4.25806	4.45161	3.67742	0.956522	1.21053	8	0	0	0	0	0	0	1	2	3	3	1
BW	Kraniopsis	C. drummondii	7	7	4.12903	4.51613	3.67742	0.914286	1.22807	8	0	0	0	0	0	0	1	2	3	3	1
BW	Kraniopsis	C. drummondii	7	7	4.25806	4.70968	3.22581	0.90411	1.46	8	25	0	0	1	0	0	1	2	3	3	1
BW	Kraniopsis	C. drummondii	7	7	4.12903	4.45161	3.35484	0.927536	1.32692	7	0	0	0	0	0	0	1	2	3	3	1
BW	Kraniopsis	C. drummondii	7	7	3.87097	3.93548	3.41935	0.983607	1.15094	6	16.6667	0	0	1	0	0	1	2	3	2	1
BW	Kraniopsis	C. drummondii	7	7	3.80645	4.3871	3.35484	0.867647	1.30769	6	16.6667	0	0	1	0	0	1	2	3	2	1
BW	Kraniopsis	C. drummondii	7	7	4.3871	4.25806	3.67742	1.0303	1.15789	7	14.2857	0	0	1	0	0	1	2	3	3	1
BW	Kraniopsis	C. drummondii	7	7	4	4.58065	3.67742	0.873239	1.24561	7	0	0	0	0	0	0	1	2	3	3	1
BW	Kraniopsis	C. drummondii	7	7	4.25806	4.64516	3.67742	0.916667	1.26316	7	14.2857	0	0	1	0	0	1	2	3	3	1
BW	Kraniopsis	C. drummondii	7	7	4.25806	4	3.74194	1.06452	1.06897	4	75	0	0	1	0	0	1	2	3	3	1
BW	Kraniopsis	C. drummondii	7	7	4.64516	4.45161	3.54839	1.04348	1.25455	6	66.6667	0	0	1	0	0	1	2	3	2	1
BW	Kraniopsis	C. drummondii	7	7	4.25806	4.83871	3.67742	0.88	1.31579	6	33.3333	0	0	1	0	0	1	2	3	3	1
BW	Kraniopsis	C. drummondii	7	8	3.93548	4.96774	3.67742	0.792208	1.35088	11	45.4545	0	0	1	0	0	1	2	3	2	1
BW	Kraniopsis	C. drummondii	7	8	3.54839	4.45161	3.41935	0.797101	1.30189	8	75	0	0	1	0	0	1	2	3	2	1
BW	Kraniopsis	C. drummondii	7	8	4	4.51613	3.54839	0.885714	1.27273	13	7.69231	0	0	1	0	0	1	2	3	2	1
BW	Kraniopsis	C. drummondii	7	8	4.06452	5.03226	3.6129	0.807692	1.39286	13	46.1538	0	0	1	0	0	1	2	3	2	1
BW	Kraniopsis	C. drummondii	7	8	3.87097	4.32258	3.41935	0.895522	1.26415	8	50	0	0	1	0	0	1	2	3	2	1
BW	Kraniopsis	C. drummondii	7	8	4.12903	5.09677	3.74194	0.810127	1.36207	8	75	0	0	1	0	0	1	2	3	2	1
BW	Kraniopsis	C. drummondii	7	8	3.6129	4.3871	3.35484	0.823529	1.30769	8	0	0	0	0	0	0	1	2	3	2	1
BW	Kraniopsis	C. drummondii	7	8	4.06452	4.96774	3.67742	0.818182	1.35088	8	75	0	0	1	0	0	1	2	3	2	1
BW	Kraniopsis	C. drummondii	7	8	4	4.90323	3.54839	0.815789	1.38182	8	100	0	0	1	0	0	1	2	3	2	1
BW	Kraniopsis	C. drummondii	7	8	3.6129	4.58065	3.54839	0.788732	1.29091	8	75	0	0	1	0	0	1	2	3	2	1
BW	Kraniopsis	C. drummondii	7	8	3.93548	4.77419	3.54839	0.824324	1.34545	8	75	0	0	1	0	0	1	2	3	2	1
BW	Kraniopsis	C. drummondii	7	8	4.25806	5.09677	3.80645	0.835443	1.33898	8	50	0	0	1	0	0	1	2	3	2	1
BW	Kraniopsis	C. drummondii	7	8	3.67742	4.58065	3.41935	0.802817	1.33962	8	75	0	0	1	0	0	1	2	3	2	1
BW	Kraniopsis	C. drummondii	7	8	4	4.90323	3.54839	0.815789	1.38182	8	50	0	0	1	0	0	1	2	3	2	1
BW	Kraniopsis	C. drummondii	7	8	3.74194	4.58065	3.48387	0.816901	1.31481	9	55.5556	0	0	1	0	0	1	2	3	2	1
BW	Kraniopsis	C. drummondii	7	8	3.74194	4.45161	3.48387	0.84058	1.27778	8	62.5	0	0	1	0	0	1	2	3	2	1
BW	Kraniopsis	C. drummondii	7	8	3.29032	3.93548	3.16129	0.836066	1.2449	9	44.4444	0	0	1	0	0	1	2	3	2	1
BW	Kraniopsis	C. drummondii	7	8	3.74194	4.58065	3.48387	0.816901	1.31481	8	75	0	0	1	0	0	1	2	3	2	1
BW	Kraniopsis	C. drummondii	7	8	3.74194	4.51613	3.41935	0.828571	1.32075	8	75	0	0	1	0	0	1	2	3	2	1
BW	Kraniopsis	C. drummondii	7	8	3.80645	4.32258	3.48387	0.880597	1.24074	8	75	0	0	1	0	0	1	2	3	2	1
BW	Kraniopsis	C. drummondii	7	8	3.48387	3.87097	3.22581	0.9	1.2	8	37.5	0	0	1	0	0	1	2	3	2	1
BW	Kraniopsis	C. drummondii	7	8	3.48387	4.19355	3.41935	0.830769	1.22642	8	75	0	0	1	0	0	1	2	3	2	1
BW	Kraniopsis	C. drummondii	7	8	3.6129	4.3871	3.35484	0.823529	1.30769	8	75	0	0	1	0	0	1	2	3	2	1
BW	Kraniopsis	C. drummondii	7	8	3.87097	4	3.6129	0.967742	1.10714	8	75	0	0	1	0	0	1	2	3	2	1
BW	Kraniopsis	C. drummondii	7	8	3.54839	4.77419	3.48387	0.743243	1.37037	8	75	0	0	1	0	0	1	2	3	2	1
BW	Kraniopsis	C. drummondii	7	8	4.12903	4.25806	3.74194	0.969697	1.13793	8	75	0	0	1	0	0	1	2	3	2	1
BW	Kraniopsis	C. drummondii	7	8	3.87097	4.12903	3.6129	0.9375	1.14286	8	75	0	0	1	0	0	1	2	3	2	1
BW	Kraniopsis	C. drummondii	7	8	3.87097	4.32258	3.41935	0.895522	1.26415	8	75	0	0	1	0	0	1	2	3	2	1
BW	Kraniopsis	C. drummondii	7	8	3.41935	4.32258	3.35484	0.791045	1.28846	8	75	0	0	1	0	0	1	2	3	2	1
BW	Kraniopsis	C. drummondii	7	8	4.32258	4.32258	3.41935	1	1.26415	8	75	0	0	1	0	0	1	2	3	2	1
BW	Kraniopsis	C. drummondii	7	9	4.12903	4.19355	3.48387	0.984615	1.2037	8	0	0	0	0	0	0	1	2	2	3	1
BW	Kraniopsis	C. drummondii	7	9	4.06452	4.12903	3.22581	0.984375	1.28	8	0	0	0	0	0	0	1	2	2	3	1
BW	Kraniopsis	C. drummondii	7	9	4.3871	4.25806	3.48387	1.0303	1.22222	8	25	0	0	1	0	0	1	2	2	3	1
BW	Kraniopsis	C. drummondii	7	9	4.12903	4.32258	3.54839	0.955224	1.21818	8	37.5	0	0	1	0	0	1	2	2	3	1
BW	Kraniopsis	C. drummondii	7	9	4.70968	4.32258	3.67742	1.08955	1.17544	8	50	0	0	1	0	0	1	2	2	3	1
BW	Kraniopsis	C. drummondii	7	9	4.51613	3.93548	3.16129	1.14754	1.2449	8	0	0	0	0	0	0	1	2	2	3	1
BW	Kraniopsis	C. drummondii	7	9	4.3871	4.25806	3.22581	1.0303	1.32	8	0	0	0	0	0	0	1	2	2	3	1
BW	Kraniopsis	C. drummondii	7	9	4.25806	4.25806	3.35484	1	1.26923	8	62.5	0	0	1	0	0	1	2	2	3	1
BW	Kraniopsis	C. drummondii	7	9	4.70968	4.64516	3.67742	1.01389	1.26316	8	37.5	0	0	1	0	0	1	2	2	3	1
BW	Kraniopsis	C. drummondii	7	9	4.25806	4.19355	3.41935	1.01538	1.22642	8	25	0	0	1	0	0	1	2	2	3	1
BW	Kraniopsis	C. drummondii	7	9	4.25806	4.19355	3.48387	1.01538	1.2037	8	12.5	0	0	1	0	0	1	2	2	3	1
BW	Kraniopsis	C. drummondii	7	9	4.45161	4.25806	3.54839	1.04545	1.2	8	37.5	0	0	1	0	0	1	2	2	3	1
BW	Kraniopsis	C. drummondii	7	9	4.25806	4	3.41935	1.06452	1.16981	8	0	0	0	0	0	0	1	2	2	2	1
BW	Kraniopsis	C. drummondii	7	9	4.77419	4.25806	3.54839	1.12121	1.2	8	0	0	0	0	0	0	1	2	3	2	1
BW	Kraniopsis	C. drummondii	7	9	4.45161	4.25806	3.54839	1.04545	1.2	8	0	0	0	0	0	0	1	2	3	2	1
BW	Kraniopsis	C. drummondii	7	9	4.19355	3.67742	3.16129	1.14035	1.16327	8	0	0	0	0	0	0	1	2	3	2	1
BW	Kraniopsis	C. drummondii	7	9	4.70968	4.19355	3.54839	1.12308	1.18182	8	0	0	0	0	0	0	1	2	3	2	1
BW	Kraniopsis	C. drummondii	7	9	4.06452	3.80645	3.09677	1.0678	1.22917	8	25	0	0	1	0	0	1	2	3	2	1
BW	Kraniopsis	C. drummondii	7	9	3.67742	3.74194	2.96774	0.982759	1.26087	8	12.5	0	0	1	0	0	1	2	3	2	1
BW	Kraniopsis	C. drummondii	7	9	4.70968	4.3871	3.54839	1.07353	1.23636	8	0	0	0	0	0	0	1	2	3	3	1
BW	Kraniopsis	C. drummondii	7	9	4.51613	4	3.29032	1.12903	1.21569	8	0	0	0	0	0	0	1	2	3	3	1
BW	Kraniopsis	C. drummondii	7	9	4	3.80645	2.96774	1.05085	1.28261	8	0	0	0	0	0	0	1	2	3	3	1
BW	Kraniopsis	C. drummondii	7	9	4.70968	4.64516	3.74194	1.01389	1.24138	8	37.5	0	0	1	0	0	1	2	3	3	1
BW	Kraniopsis	C. drummondii	7	9	4.96774	4.45161	3.67742	1.11594	1.21053	8	0	0	0	0	0	0	1	2	2	3	1
BW	Kraniopsis	C. drummondii	7	9	5.03226	4.70968	3.80645	1.06849	1.23729	10	10	0	0	1	0	0	1	2	2	3	1
BW	Kraniopsis	C. drummondii	7	9	4.3871	4.32258	3.29032	1.01493	1.31373	8	0	0	0	0	0	0	1	2	2	3	1
BW	Kraniopsis	C. drummondii	7	9	4.45161	4.06452	3.29032	1.09524	1.23529	8	0	0	0	0	0	0	1	2	2	3	1
BW	Kraniopsis	C. drummondii	7	9	4.3871	3.80645	3.16129	1.15254	1.20408	8	0	0	0	0	0	0	1	2	2	2	1
BW	Kraniopsis	C. drummondii	7	9	4.19355	3.22581	3.03226	1.3	1.06383	8	12.5	0	0	1	0	0	1	2	2	2	1
BW	Kraniopsis	C. drummondii	7	9	4.3871	4	3.16129	1.09677	1.26531	8	0	0	0	0	0	0	1	2	2	2	1
BW	Kraniopsis	C. drummondii	7	10	3.87097	4.77419	3.67742	0.810811	1.29825	8	0	0	0	0	0	0	0	2	3	2	1
BW	Kraniopsis	C. drummondii	7	10	3.54839	4.64516	3.74194	0.763889	1.24138	8	0	0	0	0	0	0	0	2	3	2	1
BW	Kraniopsis	C. drummondii	7	10	3.54839	4.58065	3.67742	0.774648	1.24561	8	0	0	0	0	0	0	0	2	3	2	1
BW	Kraniopsis	C. drummondii	7	10	3.67742	4.45161	3.74194	0.826087	1.18966	8	37.5	0	0	1	0	0	0	2	3	2	1
BW	Kraniopsis	C. drummondii	7	10	3.87097	4.70968	3.67742	0.821918	1.2807	8	50	0	0	1	0	0	0	2	3	2	1
BW	Kraniopsis	C. drummondii	7	10	3.74194	4.32258	3.67742	0.865672	1.17544	8	25	0	0	1	0	0	0	2	3	2	1
BW	Kraniopsis	C. drummondii	7	10	3.35484	4.19355	3.74194	0.8	1.12069	8	25	0	0	1	0	0	0	2	3	2	1
BW	Kraniopsis	C. drummondii	7	10	3.87097	4.3871	3.87097	0.882353	1.13333	8	0	0	0	0	0	0	0	2	3	2	1
BW	Kraniopsis	C. drummondii	7	10	3.74194	4.58065	3.67742	0.816901	1.24561	8	0	0	0	0	0	0	0	2	3	2	1
BW	Kraniopsis	C. drummondii	7	10	4.12903	4.51613	3.54839	0.914286	1.27273	8	37.5	0	0	1	0	0	0	2	3	2	1
BW	Kraniopsis	C. drummondii	7	10	3.35484	4.19355	3.54839	0.8	1.18182	8	25	0	0	1	0	0	0	2	3	2	1
BW	Kraniopsis	C. drummondii	7	10	3.67742	4.32258	3.74194	0.850746	1.15517	8	25	0	0	1	0	0	0	2	3	2	1
BW	Kraniopsis	C. drummondii	7	10	3.87097	4.64516	3.87097	0.833333	1.2	8	12.5	0	0	1	0	0	0	2	3	2	1
BW	Kraniopsis	C. drummondii	7	10	3.74194	4.77419	3.74194	0.783784	1.27586	8	25	0	0	1	0	0	0	2	3	2	1
BW	Kraniopsis	C. drummondii	7	10	4.06452	4.58065	3.67742	0.887324	1.24561	8	12.5	0	0	1	0	0	0	2	3	2	1
BW	Kraniopsis	C. drummondii	7	10	3.67742	4.70968	3.6129	0.780822	1.30357	8	25	0	0	1	0	0	0	2	3	2	1
BW	Kraniopsis	C. drummondii	7	10	3.74194	4.64516	3.67742	0.805556	1.26316	8	25	0	0	1	0	0	0	2	3	2	1
BW	Kraniopsis	C. drummondii	7	10	3.67742	4.51613	3.67742	0.814286	1.22807	8	0	0	0	0	0	0	0	2	3	2	1
BW	Kraniopsis	C. drummondii	7	10	4.25806	4.32258	3.74194	0.985075	1.15517	8	25	0	0	1	0	0	0	2	3	2	1
BW	Kraniopsis	C. drummondii	7	10	3.93548	4.64516	3.67742	0.847222	1.26316	8	0	0	0	0	0	0	0	2	3	2	1
BW	Kraniopsis	C. drummondii	7	10	4.12903	4.96774	4	0.831169	1.24194	8	12.5	0	0	1	0	0	0	2	3	2	1
BW	Kraniopsis	C. drummondii	7	10	3.54839	4.32258	3.41935	0.820896	1.26415	8	0	0	0	0	0	0	0	2	3	2	1
BW	Kraniopsis	C. drummondii	7	10	3.87097	4.77419	3.80645	0.810811	1.25424	8	0	0	0	0	0	0	0	2	3	2	1
BW	Kraniopsis	C. drummondii	7	10	3.6129	4.64516	3.67742	0.777778	1.26316	8	12.5	0	0	1	0	0	0	2	3	2	1
BW	Kraniopsis	C. drummondii	7	10	3.74194	4.45161	3.67742	0.84058	1.21053	8	50	0	0	1	0	0	0	2	3	2	1
BW	Kraniopsis	C. drummondii	7	10	3.87097	4.51613	3.67742	0.857143	1.22807	8	0	0	0	0	0	0	0	2	3	2	1
BW	Kraniopsis	C. drummondii	7	10	3.93548	4.58065	3.74194	0.859155	1.22414	8	0	0	0	0	0	0	0	2	3	2	1
BW	Kraniopsis	C. drummondii	7	10	3.87097	5.03226	3.93548	0.769231	1.27869	8	0	0	0	0	0	0	0	2	3	2	1
BW	Kraniopsis	C. drummondii	7	10	3.6129	4.58065	3.80645	0.788732	1.20339	8	0	0	0	0	0	0	0	2	3	2	1
BW	Kraniopsis	C. drummondii	7	10	3.87097	4.45161	3.54839	0.869565	1.25455	8	0	0	0	0	0	0	0	2	3	2	1
BW	Kraniopsis	C. drummondii	7	11	4	4.45161	3.80645	0.898551	1.16949	8	100	0	0	1	0	0	1	2	3	2	1
BW	Kraniopsis	C. drummondii	7	11	3.67742	4.58065	3.80645	0.802817	1.20339	8	87.5	0	0	1	0	0	1	2	3	2	1
BW	Kraniopsis	C. drummondii	7	11	3.74194	4.32258	3.93548	0.865672	1.09836	9	44.4444	0	0	1	0	0	1	2	3	2	1
BW	Kraniopsis	C. drummondii	7	11	4	4.19355	3.48387	0.953846	1.2037	8	37.5	0	0	1	0	0	0	2	3	2	1
BW	Kraniopsis	C. drummondii	7	11	3.74194	4.3871	3.67742	0.852941	1.19298	8	25	0	0	1	0	0	1	2	3	2	1
BW	Kraniopsis	C. drummondii	7	11	3.80645	4.32258	3.54839	0.880597	1.21818	8	37.5	0	0	1	0	0	0	2	3	2	1
BW	Kraniopsis	C. drummondii	7	11	3.74194	4.32258	3.6129	0.865672	1.19643	8	62.5	0	0	1	0	0	1	2	3	2	1
BW	Kraniopsis	C. drummondii	7	11	3.74194	4.19355	3.6129	0.892308	1.16071	8	37.5	0	0	1	0	0	1	2	3	2	1
BW	Kraniopsis	C. drummondii	7	11	3.87097	4.32258	3.54839	0.895522	1.21818	8	50	0	0	1	0	0	1	2	3	2	1
BW	Kraniopsis	C. drummondii	7	11	4.19355	4.19355	4.06452	1	1.03175	7	71.4286	0	0	1	0	0	1	0	3	2	1
BW	Kraniopsis	C. drummondii	7	11	3.54839	4.12903	3.54839	0.859375	1.16364	7	71.4286	0	0	1	0	0	1	2	3	2	1
BW	Kraniopsis	C. drummondii	7	11	3.54839	4.19355	3.41935	0.846154	1.22642	8	50	0	0	1	0	0	1	2	3	2	1
BW	Kraniopsis	C. drummondii	7	11	3.35484	4.12903	3.54839	0.8125	1.16364	8	87.5	0	0	1	0	0	1	2	3	2	1
BW	Kraniopsis	C. drummondii	7	11	3.87097	4.19355	3.54839	0.923077	1.18182	8	62.5	0	0	1	0	0	1	2	3	2	1
BW	Kraniopsis	C. drummondii	7	11	3.80645	4.12903	3.67742	0.921875	1.12281	8	25	0	0	1	0	0	1	2	3	2	1
BW	Kraniopsis	C. drummondii	7	11	3.87097	4.19355	3.80645	0.923077	1.10169	8	50	0	0	1	0	0	1	2	3	2	1
BW	Kraniopsis	C. drummondii	7	11	3.67742	4	3.48387	0.919355	1.14815	8	50	0	0	1	0	0	1	2	3	2	1
BW	Kraniopsis	C. drummondii	7	11	3.54839	4.19355	3.35484	0.846154	1.25	8	25	0	0	1	0	0	0	2	3	2	1
BW	Kraniopsis	C. drummondii	7	11	3.80645	4.51613	3.80645	0.842857	1.18644	8	75	0	0	1	0	0	1	2	3	2	1
BW	Kraniopsis	C. drummondii	7	11	3.74194	4.25806	3.41935	0.878788	1.24528	8	62.5	0	0	1	0	0	1	2	3	2	1
BW	Kraniopsis	C. drummondii	7	11	4.06452	4.45161	3.74194	0.913043	1.18966	8	100	0	0	1	0	0	1	2	3	2	1
BW	Kraniopsis	C. drummondii	7	11	3.67742	4.58065	3.80645	0.802817	1.20339	8	25	0	0	1	0	0	0	2	3	2	1
BW	Kraniopsis	C. drummondii	7	11	3.54839	4.19355	3.67742	0.846154	1.14035	8	75	0	0	1	0	0	1	2	3	2	1
BW	Kraniopsis	C. drummondii	7	11	3.54839	4.3871	3.6129	0.808824	1.21429	8	33.3333	0	0	1	0	0	1	2	3	2	1
BW	Kraniopsis	C. drummondii	7	11	3.35484	4.19355	3.48387	0.8	1.2037	8	87.5	0	0	1	0	0	1	2	3	2	1
BW	Kraniopsis	C. drummondii	7	11	4.06452	4.06452	3.48387	1	1.16667	8	50	0	0	1	0	0	1	2	3	2	1
BW	Kraniopsis	C. drummondii	7	11	4.06452	4.32258	3.6129	0.940299	1.19643	8	50	0	0	1	0	0	1	2	3	2	1
BW	Kraniopsis	C. drummondii	7	11	3.29032	4.3871	3.35484	0.75	1.30769	8	62.5	0	0	1	0	0	1	2	3	2	1
BW	Kraniopsis	C. drummondii	7	11	3.6129	4.19355	3.67742	0.861538	1.14035	7	75	0	0	1	0	0	1	2	3	2	1
BW	Kraniopsis	C. drummondii	7	11	3.87097	4.3871	3.74194	0.882353	1.17241	8	25	0	0	1	0	0	0	2	3	2	1
BW	Kraniopsis	C. drummondii	7	12	4.64516	4.83871	3.41935	0.96	1.41509	9	55.5556	0	0	1	0	0	1	2	3	0	1
BW	Kraniopsis	C. drummondii	7	12	4.3871	4.3871	3.41935	1	1.28302	8	100	0	0	1	0	0	1	2	3	0	1
BW	Kraniopsis	C. drummondii	7	12	4.77419	4.3871	3.67742	1.08824	1.19298	8	100	0	0	1	0	0	1	2	3	0	1
BW	Kraniopsis	C. drummondii	7	12	4.83871	4.83871	3.87097	1	1.25	8	87.5	0	0	1	0	0	1	2	3	0	1
BW	Kraniopsis	C. drummondii	7	12	4.25806	4.32258	3.29032	0.985075	1.31373	8	87.5	0	0	1	0	0	1	2	3	0	1
BW	Kraniopsis	C. drummondii	7	12	4.70968	4.19355	3.35484	1.12308	1.25	8	100	0	0	1	0	0	1	2	3	0	1
BW	Kraniopsis	C. drummondii	7	12	4.64516	4.45161	3.74194	1.04348	1.18966	8	100	0	0	1	0	0	1	2	3	0	1
BW	Kraniopsis	C. drummondii	7	12	4.96774	4.3871	3.74194	1.13235	1.17241	8	75	0	0	1	0	0	1	2	3	0	1
BW	Kraniopsis	C. drummondii	7	12	4.77419	4.32258	3.54839	1.10448	1.21818	8	100	0	0	1	0	0	1	2	3	0	1
BW	Kraniopsis	C. drummondii	7	12	4.12903	4.64516	3.6129	0.888889	1.28571	8	87.5	0	0	1	0	0	1	2	3	0	1
BW	Kraniopsis	C. drummondii	7	12	4.32258	4.25806	3.22581	1.01515	1.32	8	50	0	0	1	0	0	1	2	3	0	1
BW	Kraniopsis	C. drummondii	7	12	4.96774	4.45161	3.16129	1.11594	1.40816	8	87.5	0	0	1	0	0	1	2	3	0	1
BW	Kraniopsis	C. drummondii	7	12	4.83871	4.70968	3.80645	1.0274	1.23729	8	87.5	0	0	1	0	0	1	2	3	0	1
BW	Kraniopsis	C. drummondii	7	12	4.64516	4.70968	3.67742	0.986301	1.2807	8	87.5	0	0	1	0	0	1	2	3	0	1
BW	Kraniopsis	C. drummondii	7	12	4.12903	4.25806	3.22581	0.969697	1.32	8	100	0	0	1	0	0	1	2	3	0	1
BW	Kraniopsis	C. drummondii	7	12	4.83871	4.51613	3.54839	1.07143	1.27273	8	100	0	0	1	0	0	1	2	3	0	1
BW	Kraniopsis	C. drummondii	7	12	5.09677	4.19355	3.54839	1.21538	1.18182	8	100	0	0	1	0	0	1	2	3	0	1
BW	Kraniopsis	C. drummondii	7	12	4.64516	4.70968	3.35484	0.986301	1.40385	7	85.7143	0	0	1	0	0	1	2	3	0	1
BW	Kraniopsis	C. drummondii	7	12	4.64516	4.32258	3.67742	1.07463	1.17544	9	88.8889	0	0	1	0	0	1	2	3	0	1
BW	Kraniopsis	C. drummondii	7	12	4.90323	5.03226	3.54839	0.974359	1.41818	8	100	0	0	1	0	0	1	2	3	0	1
BW	Kraniopsis	C. drummondii	7	12	4.64516	4.96774	3.54839	0.935065	1.4	9	100	0	0	1	0	0	1	2	3	0	1
BW	Kraniopsis	C. drummondii	7	12	3.87097	4.64516	3.67742	0.833333	1.26316	8	75	0	0	1	0	0	1	2	3	0	1
BW	Kraniopsis	C. drummondii	7	12	4.77419	4.06452	3.54839	1.1746	1.14545	8	75	0	0	1	0	0	1	2	3	0	1
BW	Kraniopsis	C. drummondii	7	12	4.77419	4.90323	3.35484	0.973684	1.46154	9	55.5556	0	0	1	0	0	1	2	3	0	1
BW	Kraniopsis	C. drummondii	7	12	4.70968	4.77419	3.41935	0.986486	1.39623	8	100	0	0	1	0	0	1	2	3	0	1
BW	Kraniopsis	C. drummondii	7	12	4.58065	4.70968	3.48387	0.972603	1.35185	8	100	0	0	1	0	0	1	2	3	0	1
BW	Kraniopsis	C. drummondii	7	12	4.64516	4.70968	3.48387	0.986301	1.35185	8	75	0	0	1	0	0	1	2	2	0	1
BW	Kraniopsis	C. drummondii	7	12	4.32258	4.32258	3.16129	1	1.36735	8	100	0	0	1	0	0	1	2	2	0	1
BW	Kraniopsis	C. drummondii	7	12	4.32258	4.77419	3.41935	0.905405	1.39623	8	100	0	0	1	0	0	1	2	2	0	1
BW	Kraniopsis	C. drummondii	7	12	4.3871	4.83871	3.74194	0.906667	1.2931	8	100	0	0	1	0	0	1	2	2	0	1
BW	Kraniopsis	C. foemina	19	1	3.80645	3.54839	3.54839	1.07273	1	8	62.5	0	0	1	0	0	0	0	3	2	1
BW	Kraniopsis	C. foemina	19	1	3.87097	3.6129	3.22581	1.07143	1.12	8	37.5	0	0	1	0	0	0	0	3	2	1
BW	Kraniopsis	C. foemina	19	1	3.67742	3.41935	3.03226	1.07547	1.12766	8	37.5	0	0	1	0	0	0	0	3	2	1
BW	Kraniopsis	C. foemina	19	1	3.80645	3.48387	3.03226	1.09259	1.14894	7	71.4286	0	0	1	0	0	0	0	2	2	1
BW	Kraniopsis	C. foemina	19	1	3.74194	3.22581	2.83871	1.16	1.13636	9	55.5556	0	0	1	0	0	0	0	2	2	1
BW	Kraniopsis	C. foemina	19	2	3.67742	3.48387	2.83871	1.05556	1.22727	7	0	0	0	0	0	0	0	1	3	2	1
BW	Kraniopsis	C. foemina	19	2	3.67742	3.48387	3.03226	1.05556	1.14894	7	14.2857	0	0	1	0	0	0	0	3	3	1
BW	Kraniopsis	C. foemina	19	2	4.06452	3.87097	3.29032	1.05	1.17647	7	42.8571	0.862745	0.784314	1	1	0	0	1	3	3	1
BW	Kraniopsis	C. foemina	19	2	3.74194	3.41935	2.96774	1.09434	1.15217	8	12.5	0	0	1	0	0	0	1	3	0	1
BW	Kraniopsis	C. foemina	19	2	3.54839	3.48387	3.16129	1.01852	1.10204	8	12.5	0	0	1	0	0	0	0	3	0	1
BW	Kraniopsis	C. foemina	19	3	3.93548	5.29032	4.06452	0.743902	1.30159	8	12.5	0	0	1	0	0	0	1	3	2	1
BW	Kraniopsis	C. foemina	19	3	3.48387	5.16129	3.93548	0.675	1.31148	8	50	0	0	1	0	0	0	1	3	2	1
BW	Kraniopsis	C. foemina	19	3	3.67742	5.22581	4.06452	0.703704	1.28571	8	25	0	0	1	0	0	0	1	3	2	1
BW	Kraniopsis	C. foemina	19	3	3.41935	4.70968	3.6129	0.726027	1.30357	8	25	0	0	1	0	0	0	0	3	2	1
BW	Kraniopsis	C. foemina	19	3	3.54839	4.77419	4	0.743243	1.19355	8	37.5	0	0	1	0	0	0	0	3	2	1
BW	Kraniopsis	C. foemina	19	4	4	4.45161	3.29032	0.898551	1.35294	8	50	0	0	1	0	0	0	1	3	0	1
BW	Kraniopsis	C. foemina	19	4	4.25806	4.90323	3.67742	0.868421	1.33333	7	42.8571	0	0	1	0	0	0	1	3	0	1
BW	Kraniopsis	C. foemina	19	4	4	4.45161	3.29032	0.898551	1.35294	8	50	0	0	1	0	0	0	1	3	0	1
BW	Kraniopsis	C. foemina	19	4	4.32258	4.32258	3.35484	1	1.28846	8	37.5	0	0	1	0	0	0	1	3	0	1
BW	Kraniopsis	C. foemina	19	4	4.06452	4.12903	3.03226	0.984375	1.3617	8	37.5	0	0	1	0	0	0	1	3	0	1
BW	Kraniopsis	C. foemina	19	5	5.74194	4.45161	3.67742	1.28986	1.21053	8	25	0	0	1	0	0	0	1	2	3	1
BW	Kraniopsis	C. foemina	19	5	5.41935	4.3871	3.54839	1.23529	1.23636	8	37.5	0	0	1	0	0	0	1	2	0	1
BW	Kraniopsis	C. foemina	19	5	5.03226	4.32258	3.48387	1.16418	1.24074	8	25	0	0	1	0	0	0	1	2	0	1
BW	Kraniopsis	C. foemina	19	5	4.90323	3.80645	3.35484	1.28814	1.13462	7	28.5714	0	0	1	0	0	0	1	3	0	1
BW	Kraniopsis	C. foemina	19	5	4.83871	4.12903	3.74194	1.17188	1.10345	8	37.5	0	0	1	0	0	0	1	3	0	1
BW	Kraniopsis	C. foemina	19	5	4.70968	4.45161	3.22581	1.05797	1.38	8	37.5	0	0	1	0	0	0	1	2	2	1
BW	Kraniopsis	C. foemina	19	6	2.70968	3.35484	2.58065	0.807692	1.3	8	25	0	0	1	0	0	0	1	3	2	1
BW	Kraniopsis	C. foemina	19	6	3.03226	3.87097	3.16129	0.783333	1.22449	8	25	0	0	1	0	0	0	1	3	2	1
BW	Kraniopsis	C. foemina	19	6	3.16129	4	3.29032	0.790323	1.21569	8	50	0	0	1	0	0	0	1	2	2	1
BW	Kraniopsis	C. foemina	19	6	2.96774	3.67742	2.96774	0.807018	1.23913	8	12.5	0	0	1	0	0	0	1	3	2	1
BW	Kraniopsis	C. foemina	19	6	2.96774	3.48387	2.83871	0.851852	1.22727	6	50	0	0	1	0	0	0	1	3	0	1
BW	Kraniopsis	C. foemina	19	6	3.03226	3.87097	3.03226	0.783333	1.2766	8	0	0	0	0	0	0	0	1	3	3	1
BW	Kraniopsis	C. foemina	19	7	4.58065	4.70968	3.93548	0.972603	1.19672	8	25	0	0	1	0	0	0	1	3	2	1
BW	Kraniopsis	C. foemina	19	7	4.3871	4.45161	3.67742	0.985507	1.21053	8	12.5	0.666667	0.509804	1	1	0	0	1	3	2	1
BW	Kraniopsis	C. foemina	19	7	4.19355	4.58065	3.74194	0.915493	1.22414	8	0	0	0	0	0	0	0	1	3	3	1
BW	Kraniopsis	C. foemina	19	7	4.58065	4.77419	3.93548	0.959459	1.21311	8	25	0	0	1	0	0	0	1	3	2	1
BW	Kraniopsis	C. foemina	19	7	4.3871	3.93548	3.48387	1.11475	1.12963	8	0	0	0	0	0	0	0	0	3	2	1
BW	Kraniopsis	C. foemina	19	7	4.25806	4.25806	3.54839	1	1.2	8	37.5	0	0	1	0	0	0	1	3	2	1
BW	Kraniopsis	C. foemina	19	8	4.45161	5.41935	4.58065	0.821429	1.1831	8	0	1.62667	1.70667	0	1	0	0	1	3	2	1
BW	Kraniopsis	C. foemina	19	8	4	4.90323	4.12903	0.815789	1.1875	8	0	1.49333	1.33333	0	1	0	0	1	3	2	1
BW	Kraniopsis	C. foemina	19	8	4	4.90323	4.12903	0.815789	1.1875	8	0	1.38667	1.36	0	1	0	0	1	3	2	1
BW	Kraniopsis	C. foemina	19	8	4.06452	5.41935	4.58065	0.75	1.1831	9	0	1.65333	1.52	0	1	0	0	1	3	2	1
BW	Kraniopsis	C. foemina	19	8	4.32258	5.22581	4	0.82716	1.30645	8	0	1.41333	1.65333	0	1	0	0	1	3	2	1
BW	Kraniopsis	C. foemina	19	8	4.19355	4.96774	4.12903	0.844156	1.20312	11	0	1.54667	1.46667	0	1	0	0	1	3	2	1
BW	Kraniopsis	C. foemina	19	8	4	5.03226	4.12903	0.794872	1.21875	8	0	1.46667	1.86667	0	1	0	0	1	3	3	1
BW	Kraniopsis	C. foemina	19	8	4.32258	4.70968	3.93548	0.917808	1.19672	9	22.2222	1.57333	1.62667	1	1	0	0	1	3	3	1
BW	Kraniopsis	C. foemina	19	8	3.67742	4.83871	4.06452	0.76	1.19048	9	0	1.78667	1.68	0	1	0	0	1	3	3	1
BW	Kraniopsis	C. foemina	19	8	4.25806	5.54839	4.51613	0.767442	1.22857	8	12.5	1.22667	1.6	1	1	0	0	1	3	3	1
BW	Kraniopsis	C. foemina	19	8	3.80645	5.29032	4.19355	0.719512	1.26154	8	0	1.6	1.86667	0	1	0	0	1	3	2	1
BW	Kraniopsis	C. foemina	19	8	4.25806	5.41935	4.45161	0.785714	1.21739	8	0	1.38667	1.28	0	1	0	0	1	3	2	1
BW	Kraniopsis	C. foemina	19	8	3.6129	4.83871	3.74194	0.746667	1.2931	8	25	1.30667	1.33333	1	1	0	0	1	3	2	1
BW	Kraniopsis	C. foemina	19	8	4	5.35484	4.58065	0.746988	1.16901	8	0	1.52	1.70667	0	1	0	0	1	3	2	1
BW	Kraniopsis	C. foemina	19	8	4	5.03226	3.87097	0.794872	1.3	8	0	1.44	1.49333	0	1	0	0	1	3	2	1
BW	Kraniopsis	C. foemina	19	8	4.06452	5.16129	4.06452	0.7875	1.26984	8	0	1.76	1.73333	0	1	0	0	1	3	2	1
BW	Kraniopsis	C. foemina	19	8	4.06452	5.09677	4	0.797468	1.27419	8	0	1.6	1.65333	0	1	0	0	1	3	2	1
BW	Kraniopsis	C. foemina	19	8	3.67742	4.96774	3.87097	0.74026	1.28333	8	0	1.12	1.22667	0	1	0	0	1	3	2	1
BW	Kraniopsis	C. foemina	19	8	3.74194	4.77419	4	0.783784	1.19355	8	50	1.6	1.70667	1	1	0	0	1	3	2	1
BW	Kraniopsis	C. foemina	19	8	3.87097	5.09677	3.87097	0.759494	1.31667	8	0	1.36	1.52	0	1	0	0	1	3	2	1
BW	Kraniopsis	C. foemina	19	8	4.25806	5.41935	4.64516	0.785714	1.16667	8	0	1.14667	1.33333	0	1	0	0	1	3	2	1
BW	Kraniopsis	C. foemina	19	8	3.93548	4.96774	3.80645	0.792208	1.30508	8	0	1.33333	1.54667	0	1	0	0	1	3	2	1
BW	Kraniopsis	C. foemina	19	8	3.74194	4.51613	3.6129	0.828571	1.25	8	25	1.49333	1.86667	1	1	0	0	1	3	3	1
BW	Kraniopsis	C. foemina	19	8	4.19355	5.03226	4.06452	0.833333	1.2381	8	0	1.28	1.38667	0	1	0	0	1	3	2	1
BW	Kraniopsis	C. foemina	19	8	4.12903	5.22581	4.12903	0.790123	1.26562	8	25	1.76	1.54667	1	1	0	0	1	3	3	1
BW	Kraniopsis	C. foemina	19	8	3.29032	4.51613	3.74194	0.728571	1.2069	7	0	1.30667	1.54667	0	1	0	0	1	3	2	1
BW	Kraniopsis	C. foemina	19	8	4	4.96774	3.93548	0.805195	1.2623	8	0	1.65333	1.36	0	1	0	0	1	3	2	1
BW	Kraniopsis	C. foemina	19	8	4.77419	5.03226	4	0.948718	1.25806	9	11.1111	1.41333	1.22667	1	1	0	0	1	3	2	1
BW	Kraniopsis	C. foemina	19	8	3.87097	4.77419	3.93548	0.810811	1.21311	8	87.5	1.44	1.38667	1	1	0	0	1	3	2	1
BW	Kraniopsis	C. foemina	19	8	3.80645	4.70968	4	0.808219	1.17742	9	22.2222	0.8	0.64	1	1	0	0	1	3	2	1
BW	Kraniopsis	C. foemina	19	9	4.06452	5.16129	4.25806	0.7875	1.21212	9	0	0	0	0	0	0	0	1	3	0	1
BW	Kraniopsis	C. foemina	19	9	4.51613	5.29032	4.70968	0.853659	1.12329	8	0	0	0	0	0	0	0	1	3	0	1
BW	Kraniopsis	C. foemina	19	9	4.51613	5.41935	4.64516	0.833333	1.16667	8	0	0	0	0	0	0	0	1	3	0	1
BW	Kraniopsis	C. foemina	19	9	4.32258	5.16129	4.96774	0.8375	1.03896	8	0	0	0	0	0	0	0	1	3	0	1
BW	Kraniopsis	C. foemina	19	9	4.64516	5.6129	4.90323	0.827586	1.14474	8	12.5	0	0	1	0	0	0	1	3	0	1
BW	Kraniopsis	C. foemina	19	9	4.25806	5.29032	4.3871	0.804878	1.20588	8	0	0	0	0	0	0	0	1	3	0	1
BW	Kraniopsis	C. foemina	19	9	5.03226	5.35484	4.70968	0.939759	1.13699	9	11.1111	0	0	1	0	0	0	1	3	0	1
BW	Kraniopsis	C. foemina	19	9	4.51613	5.22581	4.45161	0.864198	1.17391	8	0	0	0	0	0	0	0	1	3	0	1
BW	Kraniopsis	C. foemina	19	9	4.64516	5.54839	4.77419	0.837209	1.16216	9	0	0	0	0	0	0	0	1	3	0	1
BW	Kraniopsis	C. foemina	19	9	4.77419	5.6129	5.09677	0.850575	1.10127	8	0	0	0	0	0	0	0	1	3	0	1
BW	Kraniopsis	C. foemina	19	9	4.25806	4.96774	4.32258	0.857143	1.14925	8	12.5	0	0	1	0	0	0	1	3	0	1
BW	Kraniopsis	C. foemina	19	9	4.51613	5.16129	4.45161	0.875	1.15942	8	0	0	0	0	0	0	0	1	3	0	1
BW	Kraniopsis	C. foemina	19	9	4.77419	5.22581	4.3871	0.91358	1.19118	9	0	0	0	0	0	0	0	1	3	0	1
BW	Kraniopsis	C. foemina	19	9	4.83871	5.29032	4.77419	0.914634	1.10811	8	0	0	0	0	0	0	0	1	3	0	1
BW	Kraniopsis	C. foemina	19	9	4.32258	5.16129	4.32258	0.8375	1.19403	8	12.5	0	0	1	0	0	0	1	3	0	1
BW	Kraniopsis	C. foemina	19	9	4.58065	5.29032	4.58065	0.865854	1.15493	8	0	0	0	0	0	0	0	1	3	0	1
BW	Kraniopsis	C. foemina	19	9	4.96774	5.09677	4.83871	0.974684	1.05333	8	12.5	0	0	1	0	0	0	1	3	2	1
BW	Kraniopsis	C. foemina	19	9	4.45161	5.16129	4.3871	0.8625	1.17647	8	0	0	0	0	0	0	0	1	3	2	1
BW	Kraniopsis	C. foemina	19	9	4.25806	5.22581	4.77419	0.814815	1.09459	8	12.5	0	0	1	0	0	0	1	3	0	1
BW	Kraniopsis	C. foemina	19	9	4.58065	5.35484	4.70968	0.855422	1.13699	9	0	0	0	0	0	0	0	1	3	2	1
BW	Kraniopsis	C. foemina	19	9	4.77419	5.22581	4.58065	0.91358	1.14085	9	11.1111	0	0	1	0	0	0	1	3	2	1
BW	Kraniopsis	C. foemina	19	9	4.90323	5.6129	4.96774	0.873563	1.12987	8	0	0	0	0	0	0	0	1	3	2	1
BW	Kraniopsis	C. foemina	19	9	4.19355	4.90323	4.32258	0.855263	1.13433	8	0	0	0	0	0	0	0	1	3	2	1
BW	Kraniopsis	C. foemina	19	9	4.58065	5.16129	4.58065	0.8875	1.12676	8	0	0	0	0	0	0	0	1	3	2	1
BW	Kraniopsis	C. foemina	19	9	4.51613	5.22581	4.70968	0.864198	1.10959	8	12.5	0	0	1	0	0	0	1	3	2	1
BW	Kraniopsis	C. foemina	19	9	4.3871	5.6129	5.03226	0.781609	1.11538	8	12.5	0	0	1	0	0	0	1	3	2	1
BW	Kraniopsis	C. foemina	19	9	4.25806	5.16129	4.51613	0.825	1.14286	8	0	0	0	0	0	0	0	1	3	2	1
BW	Kraniopsis	C. foemina	19	9	4.70968	5.87097	4.96774	0.802198	1.18182	8	12.5	0	0	1	0	0	0	1	3	2	1
BW	Kraniopsis	C. foemina	19	9	4.51613	5.6129	4.96774	0.804598	1.12987	8	0	0	0	0	0	0	0	1	3	2	1
BW	Kraniopsis	C. foemina	19	9	4.64516	5.54839	4.90323	0.837209	1.13158	8	0	0	0	0	0	0	0	1	3	0	1
BW	Kraniopsis	C. foemina	19	10	4.32258	4.3871	3.41935	0.985294	1.28302	7	57.1429	0	0	1	0	0	0	1	3	2	1
BW	Kraniopsis	C. foemina	19	10	4.32258	3.80645	3.35484	1.13559	1.13462	8	25	0	0	1	0	0	0	0	3	2	1
BW	Kraniopsis	C. foemina	19	10	4.77419	4	3.67742	1.19355	1.08772	9	77.7778	0	0	1	0	0	0	0	3	2	1
BW	Kraniopsis	C. foemina	19	10	4.83871	4.58065	3.67742	1.05634	1.24561	7	28.5714	0	0	1	0	0	0	1	3	2	1
BW	Kraniopsis	C. foemina	19	10	4.64516	3.93548	3.48387	1.18033	1.12963	7	28.5714	0	0	1	0	0	0	1	3	2	1
BW	Kraniopsis	C. foemina	19	10	4.64516	4.32258	3.41935	1.07463	1.26415	8	0	0	0	0	0	0	0	1	3	2	1
BW	Kraniopsis	C. foemina	19	10	4.3871	4.19355	3.41935	1.04615	1.22642	8	25	0	0	1	0	0	0	1	3	2	1
BW	Kraniopsis	C. foemina	19	10	4.25806	4.25806	3.41935	1	1.24528	8	0	0	0	0	0	0	0	1	3	2	1
BW	Kraniopsis	C. foemina	19	10	4.25806	3.93548	3.41935	1.08197	1.15094	7	14.2857	0	0	1	0	0	0	1	3	2	1
BW	Kraniopsis	C. foemina	19	10	4.90323	4.3871	3.48387	1.11765	1.25926	8	37.5	0	0	1	0	0	0	1	3	2	1
BW	Kraniopsis	C. foemina	19	10	4.70968	4.77419	3.74194	0.986486	1.27586	8	62.5	0	0	1	0	0	0	1	3	2	1
BW	Kraniopsis	C. foemina	19	10	4.77419	4.64516	3.54839	1.02778	1.30909	7	57.1429	0	0	1	0	0	0	1	3	2	1
BW	Kraniopsis	C. foemina	19	10	4.51613	3.6129	3.09677	1.25	1.16667	8	37.5	0	0	1	0	0	0	0	3	2	1
BW	Kraniopsis	C. foemina	19	10	4.58065	3.93548	3.6129	1.16393	1.08929	8	50	0	0	1	0	0	0	0	3	2	1
BW	Kraniopsis	C. foemina	19	10	4.70968	4.12903	3.67742	1.14062	1.12281	7	57.1429	0	0	1	0	0	0	0	3	2	1
BW	Kraniopsis	C. foemina	19	10	4.58065	4.32258	3.41935	1.0597	1.26415	8	25	0	0	1	0	0	0	1	3	2	1
BW	Kraniopsis	C. foemina	19	10	4.45161	4.19355	3.29032	1.06154	1.27451	8	62.5	0	0	1	0	0	0	1	3	2	1
BW	Kraniopsis	C. foemina	19	10	4.3871	4.25806	3.41935	1.0303	1.24528	8	25	0	0	1	0	0	0	1	3	2	1
BW	Kraniopsis	C. foemina	19	10	4.64516	4.51613	3.80645	1.02857	1.18644	8	12.5	0	0	1	0	0	0	1	3	2	1
BW	Kraniopsis	C. foemina	19	10	4.83871	4	3.41935	1.20968	1.16981	8	0	0	0	0	0	0	0	0	2	3	1
BW	Kraniopsis	C. foemina	19	10	4.45161	3.41935	3.29032	1.30189	1.03922	8	0	0	0	0	0	0	0	0	2	3	1
BW	Kraniopsis	C. foemina	19	10	4.45161	4.32258	3.6129	1.02985	1.19643	8	62.5	0	0	1	0	0	0	1	2	3	1
BW	Kraniopsis	C. foemina	19	10	4.58065	4.51613	3.41935	1.01429	1.32075	7	0	0	0	0	0	0	0	1	2	3	1
BW	Kraniopsis	C. foemina	19	10	4.45161	4.3871	3.41935	1.01471	1.28302	8	50	0	0	1	0	0	0	1	2	3	1
BW	Kraniopsis	C. foemina	19	10	4.70968	4.32258	3.6129	1.08955	1.19643	8	12.5	0	0	1	0	0	0	1	2	3	1
BW	Kraniopsis	C. foemina	19	10	4.51613	4.58065	3.54839	0.985915	1.29091	8	62.5	0	0	1	0	0	0	1	2	3	1
BW	Kraniopsis	C. foemina	19	10	4.32258	4.32258	3.41935	1	1.26415	8	62.5	0	0	1	0	0	0	1	2	2	1
BW	Kraniopsis	C. foemina	19	10	4.51613	4.12903	3.6129	1.09375	1.14286	8	50	0	0	1	0	0	0	1	2	2	1
BW	Kraniopsis	C. foemina	19	10	4.12903	4.12903	3.35484	1	1.23077	9	33.3333	0	0	1	0	0	0	0	2	2	1
BW	Kraniopsis	C. foemina	19	10	4.77419	3.80645	3.35484	1.25424	1.13462	9	0	0	0	0	0	0	0	0	2	2	1
BW	Kraniopsis	C. macrophylla	20	1	4.19355	4.25806	4.3871	0.984848	0.970588	8	25	0	0	1	0	0	1	0	3	2	1
BW	Kraniopsis	C. macrophylla	20	1	4.06452	4.25806	4.25806	0.954545	1	8	12.5	0	0	1	0	0	0	0	3	2	1
BW	Kraniopsis	C. macrophylla	20	1	4.12903	4.19355	4.12903	0.984615	1.01562	8	0	0	0	0	0	0	0	0	3	2	1
BW	Kraniopsis	C. macrophylla	20	1	4	4.3871	4	0.911765	1.09677	8	0	0	0	0	0	0	0	0	3	2	1
BW	Kraniopsis	C. macrophylla	20	1	4	4.25806	4.19355	0.939394	1.01538	7	14.2857	0	0	1	0	0	0	0	3	2	1
BW	Kraniopsis	C. macrophylla	20	2	3.41935	3.87097	3.74194	0.883333	1.03448	8	37.5	0	0	1	0	0	0	0	3	2	1
BW	Kraniopsis	C. macrophylla	20	2	4.12903	3.93548	4	1.04918	0.983871	8	0	0	0	0	0	0	0	0	3	2	1
BW	Kraniopsis	C. macrophylla	20	2	4.06452	4.06452	3.87097	1	1.05	9	0	0	0	0	0	0	0	0	3	2	1
BW	Kraniopsis	C. macrophylla	20	2	3.93548	4.19355	3.93548	0.938462	1.06557	8	25	0	0	1	0	0	0	0	3	2	1
BW	Kraniopsis	C. macrophylla	20	2	3.80645	4.06452	3.93548	0.936508	1.03279	8	0	0	0	0	0	0	0	0	3	2	1
BW	Kraniopsis	C. macrophylla	20	2	4.12903	4.51613	4.3871	0.914286	1.02941	8	50	0	0	1	0	0	0	0	3	2	1
BW	Kraniopsis	C. macrophylla	20	2	4.06452	4.19355	4.12903	0.969231	1.01562	8	50	0	0	1	0	0	0	0	3	2	1
BW	Kraniopsis	C. macrophylla	20	2	3.74194	4.06452	4	0.920635	1.01613	8	0	0	0	0	0	0	0	0	3	2	1
BW	Kraniopsis	C. macrophylla	20	2	3.67742	4.06452	3.67742	0.904762	1.10526	8	12.5	0	0	1	0	0	0	0	3	2	1
BW	Kraniopsis	C. macrophylla	20	2	4.06452	4	4.06452	1.01613	0.984127	8	37.5	0	0	1	0	0	0	0	3	2	1
BW	Kraniopsis	C. macrophylla	20	3	3.93548	3.67742	3.54839	1.07018	1.03636	8	0	1.01961	1.56863	0	1	0	0	0	3	2	1
BW	Kraniopsis	C. macrophylla	20	3	4.06452	3.80645	3.54839	1.0678	1.07273	8	0	0.980392	1.56863	0	1	0	0	0	3	2	1
BW	Kraniopsis	C. macrophylla	20	3	3.80645	3.80645	3.6129	1	1.05357	8	0	1.01961	1.45098	0	1	0	0	0	3	2	1
BW	Kraniopsis	C. macrophylla	20	3	4.19355	3.74194	3.48387	1.12069	1.07407	8	0	0.980392	1.41176	0	1	0	0	0	3	2	1
BW	Kraniopsis	C. macrophylla	20	3	3.87097	3.80645	3.6129	1.01695	1.05357	8	0	1.17647	1.4902	0	1	0	0	0	3	2	1
BW	Kraniopsis	C. macrophylla	20	4	3.67742	4.19355	3.87097	0.876923	1.08333	8	0	1.01333	1.04	0	1	0	0	0	3	2	1
BW	Kraniopsis	C. macrophylla	20	4	3.35484	3.54839	3.29032	0.945455	1.07843	8	0	0.933333	1.12	0	1	0	0	0	3	2	1
BW	Kraniopsis	C. macrophylla	20	4	3.87097	4.32258	3.93548	0.895522	1.09836	8	0	0.96	1.01333	0	1	0	0	0	3	2	1
BW	Kraniopsis	C. macrophylla	20	4	3.41935	4.12903	3.67742	0.828125	1.12281	8	0	1.06667	1.33333	0	1	0	0	0	3	2	1
BW	Kraniopsis	C. macrophylla	20	4	3.41935	3.54839	3.35484	0.963636	1.05769	8	0	1.09333	1.09333	0	1	0	0	0	3	2	1
BW	Kraniopsis	C. macrophylla	20	4	3.29032	3.67742	3.35484	0.894737	1.09615	8	0	1.01333	0.88	0	1	0	0	0	3	2	1
BW	Kraniopsis	C. macrophylla	20	4	3.35484	3.6129	3.48387	0.928571	1.03704	8	0	0.8	0.88	0	1	0	0	0	3	2	1
BW	Kraniopsis	C. macrophylla	20	4	3.41935	3.87097	3.48387	0.883333	1.11111	8	0	1.04	1.12	0	1	0	0	0	3	2	1
BW	Kraniopsis	C. macrophylla	20	4	3.6129	3.87097	3.6129	0.933333	1.07143	8	0	1.04	0.906667	0	1	0	0	0	3	2	1
BW	Kraniopsis	C. macrophylla	20	4	3.54839	4.3871	3.87097	0.808824	1.13333	8	0	1.14667	1.14667	0	1	0	0	0	3	2	1
BW	Kraniopsis	C. macrophylla	20	4	3.41935	4.06452	3.6129	0.84127	1.125	8	12.5	0.8	1.38667	1	1	0	0	0	3	2	1
BW	Kraniopsis	C. macrophylla	20	4	3.22581	3.74194	3.35484	0.862069	1.11538	8	0	0.96	1.06667	0	1	0	0	0	3	2	1
BW	Kraniopsis	C. macrophylla	20	4	3.29032	3.80645	3.35484	0.864407	1.13462	8	0	1.06667	1.01333	0	1	0	0	0	3	2	1
BW	Kraniopsis	C. macrophylla	20	4	3.48387	3.67742	3.6129	0.947368	1.01786	8	0	0.96	1.06667	0	1	0	0	0	3	2	1
BW	Kraniopsis	C. macrophylla	20	4	3.16129	3.54839	3.35484	0.890909	1.05769	8	0	0.933333	0.853333	0	1	0	0	0	3	2	1
BW	Kraniopsis	C. macrophylla	20	4	3.35484	3.93548	3.48387	0.852459	1.12963	8	0	0	0	0	0	0	0	0	3	2	1
BW	Kraniopsis	C. macrophylla	20	4	3.22581	3.6129	3.48387	0.892857	1.03704	8	0	0.96	1.01333	0	1	0	0	0	3	2	1
BW	Kraniopsis	C. macrophylla	20	4	3.54839	3.80645	3.48387	0.932203	1.09259	8	0	0.853333	0.96	0	1	0	0	0	3	2	1
BW	Kraniopsis	C. macrophylla	20	4	3.35484	3.67742	3.54839	0.912281	1.03636	8	0	0.746667	0.826667	0	1	0	0	0	3	2	1
BW	Kraniopsis	C. macrophylla	20	4	3.35484	3.67742	3.35484	0.912281	1.09615	8	0	0	0	0	0	0	0	0	3	2	1
BW	Kraniopsis	C. macrophylla	20	4	3.41935	3.80645	3.48387	0.898305	1.09259	8	0	0.853333	0.96	0	1	0	0	0	3	2	1
BW	Kraniopsis	C. macrophylla	20	4	3.41935	3.80645	3.48387	0.898305	1.09259	8	0	0.933333	0.933333	0	1	0	0	0	3	2	1
BW	Kraniopsis	C. macrophylla	20	4	3.67742	3.74194	3.48387	0.982759	1.07407	7	0	0.986667	0.986667	0	1	0	0	0	3	2	1
BW	Kraniopsis	C. macrophylla	20	4	3.09677	3.48387	3.22581	0.888889	1.08	8	0	0.773333	0.773333	0	1	0	0	0	3	2	1
BW	Kraniopsis	C. macrophylla	20	4	3.29032	3.48387	3.35484	0.944444	1.03846	8	0	0.986667	0.906667	0	1	0	0	0	3	2	1
BW	Kraniopsis	C. macrophylla	20	4	3.16129	3.48387	3.35484	0.907407	1.03846	8	0	0.933333	0.986667	0	1	0	0	0	3	2	1
BW	Kraniopsis	C. macrophylla	20	4	3.41935	3.67742	3.48387	0.929825	1.05556	8	0	0.986667	0.933333	0	1	0	0	0	3	2	1
BW	Kraniopsis	C. macrophylla	20	4	3.35484	3.67742	3.48387	0.912281	1.05556	8	0	0.8	1.04	0	1	0	0	0	3	2	1
BW	Kraniopsis	C. macrophylla	20	4	3.41935	3.6129	3.35484	0.946429	1.07692	8	0	0.8	0.933333	0	1	0	0	0	3	2	1
BW	Kraniopsis	C. macrophylla	20	4	3.09677	3.6129	3.29032	0.857143	1.09804	8	0	0	0	0	0	0	0	0	3	2	1
BW	Kraniopsis	C. macrophylla	20	5	3.74194	3.74194	3.54839	1	1.05455	8	0	0	0	0	0	0	0	0	3	2	1
BW	Kraniopsis	C. macrophylla	20	5	3.80645	3.67742	3.87097	1.03509	0.95	8	0	0	0	0	0	0	0	0	3	2	1
BW	Kraniopsis	C. macrophylla	20	5	3.80645	3.74194	3.87097	1.01724	0.966667	8	0	0	0	0	0	0	0	0	3	2	1
BW	Kraniopsis	C. macrophylla	20	5	3.74194	3.67742	3.87097	1.01754	0.95	8	0	0	0	0	0	0	0	0	3	2	1
BW	Kraniopsis	C. macrophylla	20	5	3.80645	3.80645	3.93548	1	0.967213	8	0	0	0	0	0	0	0	0	3	2	1
BW	Kraniopsis	C. macrophylla	20	5	3.67742	3.74194	3.54839	0.982759	1.05455	8	0	0	0	0	0	0	0	0	3	2	1
BW	Kraniopsis	C. macrophylla	20	5	3.93548	3.80645	3.93548	1.0339	0.967213	8	0	0	0	0	0	0	0	0	3	2	1
BW	Kraniopsis	C. macrophylla	20	5	3.74194	3.74194	3.54839	1	1.05455	8	0	0	0	0	0	0	0	0	3	2	1
BW	Kraniopsis	C. macrophylla	20	5	4	3.6129	3.87097	1.10714	0.933333	8	0	0	0	0	0	0	0	0	3	2	1
BW	Kraniopsis	C. macrophylla	20	5	3.80645	3.67742	3.87097	1.03509	0.95	8	0	0	0	0	0	0	0	0	3	2	1
BW	Kraniopsis	C. macrophylla	20	5	4	3.6129	3.80645	1.10714	0.949153	8	0	0	0	0	0	0	0	0	3	2	1
BW	Kraniopsis	C. macrophylla	20	5	3.80645	3.80645	3.74194	1	1.01724	8	0	0	0	0	0	0	0	0	3	2	1
BW	Kraniopsis	C. macrophylla	20	5	3.80645	3.74194	3.74194	1.01724	1	8	0	0	0	0	0	0	0	0	3	2	1
BW	Kraniopsis	C. macrophylla	20	5	4	3.87097	3.6129	1.03333	1.07143	8	0	0	0	0	0	0	0	0	3	2	1
BW	Kraniopsis	C. macrophylla	20	5	4	3.6129	3.87097	1.10714	0.933333	8	0	0	0	0	0	0	0	0	3	2	1
BW	Kraniopsis	C. macrophylla	20	5	4.06452	3.67742	3.80645	1.10526	0.966102	8	0	0	0	0	0	0	0	0	3	2	1
BW	Kraniopsis	C. macrophylla	20	5	3.87097	3.74194	4	1.03448	0.935484	8	0	0	0	0	0	0	0	0	3	2	1
BW	Kraniopsis	C. macrophylla	20	5	3.80645	3.80645	3.93548	1	0.967213	8	0	0	0	0	0	0	0	0	3	2	1
BW	Kraniopsis	C. macrophylla	20	5	3.74194	3.67742	3.87097	1.01754	0.95	8	0	0	0	0	0	0	0	0	3	2	1
BW	Kraniopsis	C. macrophylla	20	5	3.80645	3.74194	3.87097	1.01724	0.966667	8	0	0	0	0	0	0	0	0	3	2	1
BW	Kraniopsis	C. macrophylla	20	5	3.80645	3.67742	3.87097	1.03509	0.95	8	0	0	0	0	0	0	0	0	3	2	1
BW	Kraniopsis	C. macrophylla	20	5	3.80645	3.67742	3.93548	1.03509	0.934426	8	0	0	0	0	0	0	0	0	3	2	1
BW	Kraniopsis	C. macrophylla	20	5	3.87097	3.74194	3.87097	1.03448	0.966667	8	0	0	0	0	0	0	0	0	3	2	1
BW	Kraniopsis	C. macrophylla	20	5	3.93548	3.74194	3.80645	1.05172	0.983051	8	0	0	0	0	0	0	0	0	3	2	1
BW	Kraniopsis	C. macrophylla	20	5	3.87097	3.74194	3.93548	1.03448	0.95082	8	0	0	0	0	0	0	0	0	3	2	1
BW	Kraniopsis	C. macrophylla	20	5	3.74194	3.74194	3.54839	1	1.05455	8	0	0	0	0	0	0	0	0	3	2	1
BW	Kraniopsis	C. macrophylla	20	5	4	3.80645	3.87097	1.05085	0.983333	8	0	0	0	0	0	0	0	0	3	2	1
BW	Kraniopsis	C. macrophylla	20	5	3.87097	3.74194	3.67742	1.03448	1.01754	8	0	0	0	0	0	0	0	0	3	2	1
BW	Kraniopsis	C. macrophylla	20	5	3.87097	3.67742	3.93548	1.05263	0.934426	8	0	0	0	0	0	0	0	0	3	2	1
BW	Kraniopsis	C. macrophylla	20	5	3.87097	3.74194	3.87097	1.03448	0.966667	8	0	0	0	0	0	0	0	0	3	2	1
BW	Kraniopsis	C. macrophylla	20	6	4.3871	4.70968	4.32258	0.931507	1.08955	8	12.5	0	0	1	0	0	0	1	3	2	1
BW	Kraniopsis	C. macrophylla	20	6	4.58065	4.77419	4.32258	0.959459	1.10448	9	33.3333	0	0	1	0	0	0	1	3	2	1
BW	Kraniopsis	C. macrophylla	20	6	4.96774	5.16129	4.96774	0.9625	1.03896	8	37.5	0	0	1	0	0	0	1	3	2	1
BW	Kraniopsis	C. macrophylla	20	6	4.77419	4.58065	4.25806	1.04225	1.07576	8	25	0	0	1	0	0	0	1	3	2	1
BW	Kraniopsis	C. macrophylla	20	6	4.64516	4.83871	4.32258	0.96	1.1194	8	75	0	0	1	0	0	0	0	3	2	1
BW	Kraniopsis	C. macrophylla	20	6	4.64516	4.64516	4.32258	1	1.07463	8	50	0	0	1	0	0	0	0	3	2	1
BW	Kraniopsis	C. macrophylla	20	6	4.32258	4.51613	4.19355	0.957143	1.07692	8	50	0	0	1	0	0	0	0	3	2	1
BW	Kraniopsis	C. macrophylla	20	6	4.77419	4.90323	4.45161	0.973684	1.10145	8	37.5	0	0	1	0	0	0	0	3	2	1
BW	Kraniopsis	C. macrophylla	20	6	4.45161	4.77419	4.45161	0.932432	1.07246	8	62.5	0	0	1	0	0	0	0	3	2	1
BW	Kraniopsis	C. macrophylla	20	6	4.70968	4.83871	4.45161	0.973333	1.08696	8	50	0	0	1	0	0	0	0	3	2	1
BW	Kraniopsis	C. macrophylla	20	6	4.3871	4.64516	4.25806	0.944444	1.09091	8	37.5	0	0	1	0	0	0	0	3	2	1
BW	Kraniopsis	C. macrophylla	20	6	4.83871	4.90323	4.19355	0.986842	1.16923	8	50	0	0	1	0	0	0	1	3	2	1
BW	Kraniopsis	C. macrophylla	20	6	4.96774	5.09677	4.58065	0.974684	1.11268	8	62.5	0	0	1	0	0	0	1	3	2	1
BW	Kraniopsis	C. macrophylla	20	6	4.83871	4.70968	4.25806	1.0274	1.10606	9	44.4444	0	0	1	0	0	0	0	3	2	1
BW	Kraniopsis	C. macrophylla	20	6	4.51613	4.51613	4.19355	1	1.07692	8	50	0	0	1	0	0	0	0	3	2	1
BW	Kraniopsis	C. macrophylla	20	6	4.51613	4.77419	4.25806	0.945946	1.12121	8	50	0	0	1	0	0	0	1	3	2	1
BW	Kraniopsis	C. macrophylla	20	6	4.90323	5.16129	4.51613	0.95	1.14286	8	50	0	0	1	0	0	0	1	3	2	1
BW	Kraniopsis	C. macrophylla	20	6	4.83871	4.96774	4.64516	0.974026	1.06944	8	62.5	0	0	1	0	0	0	0	3	2	1
BW	Kraniopsis	C. macrophylla	20	6	4.45161	4.64516	4.19355	0.958333	1.10769	8	37.5	0	0	1	0	0	0	0	3	2	1
BW	Kraniopsis	C. macrophylla	20	6	4.3871	4.25806	4	1.0303	1.06452	8	25	0	0	1	0	0	0	0	3	2	1
BW	Kraniopsis	C. macrophylla	20	6	4.64516	4.64516	4.06452	1	1.14286	8	50	0	0	1	0	0	0	1	3	2	1
BW	Kraniopsis	C. macrophylla	20	6	4.19355	4.3871	4.12903	0.955882	1.0625	8	62.5	0	0	1	0	0	0	0	3	2	1
BW	Kraniopsis	C. macrophylla	20	6	4.51613	4.83871	4.45161	0.933333	1.08696	8	37.5	0	0	1	0	0	0	1	3	2	1
BW	Kraniopsis	C. macrophylla	20	6	4.45161	4.58065	4.19355	0.971831	1.09231	8	37.5	0	0	1	0	0	0	1	3	2	1
BW	Kraniopsis	C. macrophylla	20	6	4.19355	4.12903	4	1.01562	1.03226	8	37.5	0	0	1	0	0	0	0	3	2	1
BW	Kraniopsis	C. macrophylla	20	6	4.3871	4.45161	4.25806	0.985507	1.04545	8	25	0	0	1	0	0	0	1	3	2	1
BW	Kraniopsis	C. macrophylla	20	6	4.70968	4.70968	4.25806	1	1.10606	8	12.5	0	0	1	0	0	0	1	3	2	1
BW	Kraniopsis	C. macrophylla	20	6	4.64516	4.83871	4.45161	0.96	1.08696	8	37.5	0	0	1	0	0	0	0	3	2	1
BW	Kraniopsis	C. macrophylla	20	6	4.77419	4.45161	4.12903	1.07246	1.07812	8	37.5	0	0	1	0	0	0	0	3	2	1
BW	Kraniopsis	C. macrophylla	20	6	4.32258	4.25806	4.06452	1.01515	1.04762	8	50	0	0	1	0	0	0	0	3	2	1
BW	Kraniopsis	C. obliqua	11	1	4	3.87097	3.29032	1.03333	1.17647	6	66.6667	0	0	1	0	1	1	1	0	3	2
BW	Kraniopsis	C. obliqua	11	1	3.87097	3.6129	3.29032	1.07143	1.09804	8	50	0	0	1	0	1	1	0	0	3	2
BW	Kraniopsis	C. obliqua	11	1	4.51613	3.41935	2.83871	1.32075	1.20455	8	62.5	0	0	1	0	1	0	0	0	3	2
BW	Kraniopsis	C. obliqua	11	1	4.19355	3.80645	3.16129	1.10169	1.20408	8	62.5	0	0	1	0	1	1	1	0	2	2
BW	Kraniopsis	C. obliqua	11	1	4.3871	3.54839	3.03226	1.23636	1.17021	7	57.1429	0	0	1	0	1	0	0	0	2	2
BW	Kraniopsis	C. obliqua	11	1	3.6129	3.48387	2.70968	1.03704	1.28571	7	57.1429	0	0	1	0	1	1	1	0	2	2
BW	Kraniopsis	C. obliqua	11	2	4.90323	5.22581	4.64516	0.938272	1.125	8	50	0	0	1	0	1	1	0	3	2	2
BW	Kraniopsis	C. obliqua	11	2	4.77419	5.48387	4.77419	0.870588	1.14865	8	75	0	0	1	0	1	1	1	3	2	2
BW	Kraniopsis	C. obliqua	11	2	4.64516	5.03226	4.06452	0.923077	1.2381	8	50	0	0	1	0	1	1	1	3	2	2
BW	Kraniopsis	C. obliqua	11	2	4.3871	5.29032	4.51613	0.829268	1.17143	8	37.5	0	0	1	0	1	0	1	3	2	2
BW	Kraniopsis	C. obliqua	11	2	4.32258	5.35484	4.70968	0.807229	1.13699	8	75	0	0	1	0	1	0	1	3	2	2
BW	Kraniopsis	C. obliqua	11	3	4.70968	4.3871	3.80645	1.07353	1.15254	8	0	0	0	0	0	1	0	1	0	3	2
BW	Kraniopsis	C. obliqua	11	3	5.22581	5.09677	4.25806	1.02532	1.19697	8	25	0	0	1	0	1	0	1	0	2	2
BW	Kraniopsis	C. obliqua	11	3	4.90323	4.51613	3.80645	1.08571	1.18644	8	25	0	0	1	0	1	0	0	0	2	2
BW	Kraniopsis	C. obliqua	11	3	4.64516	4.77419	3.93548	0.972973	1.21311	8	25	0	0	1	0	1	0	0	0	3	2
BW	Kraniopsis	C. obliqua	11	3	5.74194	4.70968	4.25806	1.21918	1.10606	8	25	0	0	1	0	1	0	0	0	3	2
BW	Kraniopsis	C. obliqua	11	4	4.77419	5.16129	4.19355	0.925	1.23077	8	50	0	0	1	0	1	0	1	0	2	2
BW	Kraniopsis	C. obliqua	11	4	4	4.64516	3.6129	0.861111	1.28571	8	75	0	0	1	0	1	0	1	0	2	2
BW	Kraniopsis	C. obliqua	11	4	4.83871	5.48387	4	0.882353	1.37097	8	62.5	0	0	1	0	1	0	1	0	2	2
BW	Kraniopsis	C. obliqua	11	4	4.58065	5.03226	4.77419	0.910256	1.05405	8	25	0	0	1	0	1	0	0	0	2	2
BW	Kraniopsis	C. obliqua	11	4	4.3871	5.16129	4.51613	0.85	1.14286	8	25	0	0	1	0	1	0	1	0	2	2
BW	Kraniopsis	C. obliqua	11	4	4.96774	5.16129	4.83871	0.9625	1.06667	8	37.5	0	0	1	0	1	0	0	0	2	2
BW	Kraniopsis	C. obliqua	11	4	4.25806	5.03226	3.80645	0.846154	1.32203	8	62.5	0	0	1	0	1	0	1	0	2	2
BW	Kraniopsis	C. obliqua	11	5	6.12903	4.70968	4	1.30137	1.17742	8	25	0	0	1	0	1	0	0	0	3	2
BW	Kraniopsis	C. obliqua	11	5	6.32258	5.29032	4.83871	1.19512	1.09333	7	14.2857	0	0	1	0	1	0	0	0	2	2
BW	Kraniopsis	C. obliqua	11	5	5.6129	5.03226	3.93548	1.11538	1.27869	7	28.5714	0	0	1	0	1	0	0	0	2	2
BW	Kraniopsis	C. obliqua	11	5	6.51613	5.09677	4.90323	1.27848	1.03947	8	25	0	0	1	0	1	0	0	0	3	2
BW	Kraniopsis	C. obliqua	11	5	5.54839	5.22581	5.09677	1.06173	1.02532	8	25	0	0	1	0	1	0	0	0	2	2
BW	Kraniopsis	C. obliqua	11	5	5.41935	4.58065	4.51613	1.1831	1.01429	7	14.2857	0	0	1	0	1	0	0	0	2	2
BW	Kraniopsis	C. obliqua	11	5	5.03226	5.03226	3.87097	1	1.3	8	50	0	0	1	0	1	0	1	0	2	2
BW	Kraniopsis	C. obliqua	11	5	5.16129	4.19355	3.80645	1.23077	1.10169	8	25	0	0	1	0	1	0	0	0	2	2
BW	Kraniopsis	C. obliqua	11	6	6.58065	5.03226	4.45161	1.30769	1.13043	8	0	0	0	0	0	1	0	0	1	3	2
BW	Kraniopsis	C. obliqua	11	6	6.25806	4.90323	4.70968	1.27632	1.0411	9	11.1111	0	0	1	0	1	0	0	1	3	2
BW	Kraniopsis	C. obliqua	11	6	6	5.29032	4.64516	1.13415	1.13889	9	22.2222	0	0	1	0	1	0	1	1	3	2
BW	Kraniopsis	C. obliqua	11	6	5.74194	4.83871	3.74194	1.18667	1.2931	7	14.2857	0	0	1	0	1	0	1	1	3	2
BW	Kraniopsis	C. obliqua	11	6	5.03226	4.19355	4.06452	1.2	1.03175	8	0	0	0	0	0	1	0	0	1	3	2
BW	Kraniopsis	C. obliqua	11	6	5.22581	4.64516	4	1.125	1.16129	8	37.5	0	0	1	0	1	0	1	1	3	2
BW	Kraniopsis	C. obliqua	11	6	5.03226	4.70968	4.5	1.06849	1.04659	8	12.5	0	0	1	0	1	0	0	1	3	2
BW	Kraniopsis	C. obliqua	11	6	6.51613	4.12903	4.64516	1.57813	0.888889	8	0	0	0	0	0	1	0	0	1	3	2
BW	Kraniopsis	C. obliqua	11	6	4.90323	5.03226	4.12903	0.974359	1.21875	8	12.5	0	0	1	0	1	0	1	1	3	2
BW	Kraniopsis	C. obliqua	11	6	5.6129	4.70968	4.51613	1.19178	1.04286	7	14.2857	0	0	1	0	1	0	0	1	3	2
BW	Kraniopsis	C. obliqua	11	6	5.87097	4.58065	4.70968	1.28169	0.972603	8	0	0	0	0	0	1	0	0	1	3	2
BW	Kraniopsis	C. obliqua	11	6	5.93548	4.83871	4.64516	1.22667	1.04167	8	0	0	0	0	0	1	0	0	1	3	2
BW	Kraniopsis	C. obliqua	11	6	5.48387	4.77419	4.06452	1.14865	1.1746	8	12.5	0	0	1	0	1	0	1	1	3	2
BW	Kraniopsis	C. obliqua	11	6	5.16129	4.45161	4	1.15942	1.1129	8	0	0	0	0	0	1	0	0	1	3	2
BW	Kraniopsis	C. obliqua	11	6	6.19355	4.64516	4.77419	1.33333	0.972973	8	12.5	0	0	1	0	1	0	0	1	2	2
BW	Kraniopsis	C. obliqua	11	6	5.54839	4.96774	4.64516	1.11688	1.06944	7	14.2857	0	0	1	0	1	0	0	1	2	2
BW	Kraniopsis	C. obliqua	11	6	5.41935	4.83871	4.58065	1.12	1.05634	8	12.5	0	0	1	0	1	0	0	1	2	2
BW	Kraniopsis	C. obliqua	11	6	5.35484	4.70968	4.64516	1.13699	1.01389	8	0	0	0	0	0	1	0	0	1	2	2
BW	Kraniopsis	C. obliqua	11	6	5.41935	4.83871	4.58065	1.12	1.05634	8	0	0	0	0	0	1	0	1	1	2	2
BW	Kraniopsis	C. obliqua	11	6	4.58065	4.3871	4.06452	1.04412	1.07937	8	25	0	0	1	0	1	0	1	0	2	2
BW	Kraniopsis	C. obliqua	11	6	4.77419	5.03226	4	0.948718	1.25806	8	12.5	0	0	1	0	1	0	1	0	2	2
BW	Kraniopsis	C. obliqua	11	6	5.67742	4.19355	4.3871	1.35385	0.955882	9	0	0	0	0	0	1	0	0	0	2	2
BW	Kraniopsis	C. obliqua	11	6	5.09677	5.09677	4	1	1.27419	8	25	0	0	1	0	1	0	1	0	2	2
BW	Kraniopsis	C. obliqua	11	6	5.09677	4.90323	3.87097	1.03947	1.26667	8	25	0	0	1	0	1	0	1	0	3	2
BW	Kraniopsis	C. obliqua	11	6	5.93548	4.77419	4.45161	1.24324	1.07246	8	12.5	0	0	1	0	1	0	0	0	3	2
BW	Kraniopsis	C. obliqua	11	6	5.16129	4.19355	3.74194	1.23077	1.12069	8	0	0	0	0	0	1	0	0	0	2	2
BW	Kraniopsis	C. obliqua	11	6	5.6129	4.58065	4.32258	1.22535	1.0597	7	0	0	0	0	0	1	0	0	0	2	2
BW	Kraniopsis	C. obliqua	11	6	5.03226	4.45161	3.48387	1.13043	1.27778	8	12.5	0	0	1	0	1	0	1	1	3	2
BW	Kraniopsis	C. obliqua	11	6	5.74194	4.58065	4.64516	1.25352	0.986111	8	12.5	0	0	1	0	1	0	0	1	3	2
BW	Kraniopsis	C. obliqua	11	6	5.29032	4.51613	4.64516	1.17143	0.972222	8	12.5	0	0	1	0	1	0	0	1	2	2
BW	Kraniopsis	C. obliqua	11	7	4.32258	4.83871	3.80645	0.893333	1.27119	8	37.5	0	0	1	0	1	0	1	0	0	2
BW	Kraniopsis	C. obliqua	11	7	5.03226	5.22581	4.06452	0.962963	1.28571	7	14.2857	0	0	1	0	1	0	1	0	0	2
BW	Kraniopsis	C. obliqua	11	7	4.70968	4.96774	3.93548	0.948052	1.2623	8	25	0	0	1	0	1	0	1	0	0	2
BW	Kraniopsis	C. obliqua	11	7	5.48387	4.70968	3.93548	1.16438	1.19672	7	57.1429	0	0	1	0	1	0	1	0	3	2
BW	Kraniopsis	C. obliqua	11	7	4.90323	4.70968	3.67742	1.0411	1.2807	6	50	0	0	1	0	1	0	1	0	3	2
BW	Kraniopsis	C. obliqua	11	7	5.03226	4.77419	3.67742	1.05405	1.29825	6	66.6667	0	0	1	0	1	0	1	0	0	2
BW	Kraniopsis	C. obliqua	11	7	5.09677	4.83871	4.32258	1.05333	1.1194	8	12.5	0	0	1	0	1	0	0	0	0	2
BW	Kraniopsis	C. obliqua	11	7	4.3871	4.96774	4.25806	0.883117	1.16667	6	66.6667	0	0	1	0	1	0	1	0	2	2
BW	Kraniopsis	C. obliqua	11	7	4.64516	4.83871	3.80645	0.96	1.27119	8	37.5	0	0	1	0	1	0	1	0	2	2
BW	Kraniopsis	C. obliqua	11	7	5.03226	4.70968	4.12903	1.06849	1.14062	7	28.5714	0	0	1	0	1	0	1	0	2	2
BW	Kraniopsis	C. obliqua	11	7	4.90323	4.51613	3.93548	1.08571	1.14754	6	66.6667	0	0	1	0	1	0	1	2	2	2
BW	Kraniopsis	C. obliqua	11	7	4.51613	4.77419	4.06452	0.945946	1.1746	8	25	0	0	1	0	1	0	1	2	2	2
BW	Kraniopsis	C. obliqua	11	7	5.03226	4.45161	4.3871	1.13043	1.01471	8	12.5	0	0	1	0	1	0	0	2	2	2
BW	Kraniopsis	C. obliqua	11	7	4.83871	5.22581	4	0.925926	1.30645	8	0	0	0	0	0	1	0	1	2	2	2
BW	Kraniopsis	C. obliqua	11	7	4.45161	4.90323	4.12903	0.907895	1.1875	7	28.5714	0	0	1	0	1	0	0	2	2	2
BW	Kraniopsis	C. obliqua	11	7	4.32258	4.58065	3.80645	0.943662	1.20339	8	12.5	0	0	1	0	1	0	0	2	2	2
BW	Kraniopsis	C. obliqua	11	7	4.25806	4.70968	3.87097	0.90411	1.21667	8	0	0	0	0	0	1	0	1	2	2	2
BW	Kraniopsis	C. obliqua	11	7	4.64516	4.64516	4.45161	1	1.04348	8	25	0	0	1	0	1	0	0	2	2	2
BW	Kraniopsis	C. obliqua	11	7	4.77419	4.96774	4	0.961039	1.24194	8	0	0	0	0	0	1	0	1	3	2	2
BW	Kraniopsis	C. obliqua	11	7	4.64516	5.35484	4.06452	0.86747	1.31746	8	25	0	0	1	0	1	0	1	3	2	2
BW	Kraniopsis	C. obliqua	11	7	4.64516	4.77419	4	0.972973	1.19355	8	12.5	0	0	1	0	1	0	1	3	2	2
BW	Kraniopsis	C. obliqua	11	7	5.09677	4.77419	4.12903	1.06757	1.15625	8	12.5	0	0	1	0	1	0	1	0	2	2
BW	Kraniopsis	C. obliqua	11	7	4.32258	4.83871	4.19355	0.893333	1.15385	8	25	0	0	1	0	1	0	1	0	2	2
BW	Kraniopsis	C. obliqua	11	7	4.64516	4.45161	4.32258	1.04348	1.02985	8	12.5	0	0	1	0	1	0	0	0	2	2
BW	Kraniopsis	C. obliqua	11	7	4.45161	4.3871	3.6129	1.01471	1.21429	8	25	0	0	1	0	1	0	1	0	2	2
BW	Kraniopsis	C. obliqua	11	7	5.6129	5.03226	4.19355	1.11538	1.2	8	12.5	0	0	1	0	1	0	1	0	2	2
BW	Kraniopsis	C. obliqua	11	7	4.3871	4.83871	3.80645	0.906667	1.27119	8	25	0	0	1	0	1	0	1	0	2	2
BW	Kraniopsis	C. obliqua	11	7	4.58065	4.83871	4.12903	0.946667	1.17188	8	0	0	0	0	0	1	0	1	0	2	2
BW	Kraniopsis	C. obliqua	11	7	4.77419	4.70968	4	1.0137	1.17742	7	28.5714	0	0	1	0	1	0	1	0	2	2
BW	Kraniopsis	C. obliqua	11	7	4.64516	4.83871	4.19355	0.96	1.15385	8	12.5	0	0	1	0	1	0	1	0	2	2
BW	Kraniopsis	C. obliqua	11	8	4.3871	5.74194	4.96774	0.764045	1.15584	7	14.2857	0	0	1	0	1	0	0	0	2	2
BW	Kraniopsis	C. obliqua	11	8	5.6129	5.74194	5.16129	0.977528	1.1125	8	50	0	0	1	0	1	0	0	0	2	2
BW	Kraniopsis	C. obliqua	11	8	4.83871	5.41935	5.03226	0.892857	1.07692	7	28.5714	0	0	1	0	1	0	0	0	2	2
BW	Kraniopsis	C. obliqua	11	8	4.3871	5.29032	4.45161	0.829268	1.18841	8	37.5	0	0	1	0	1	0	1	0	2	2
BW	Kraniopsis	C. obliqua	11	8	3.87097	5.16129	4.70968	0.75	1.09589	7	57.1429	0	0	1	0	1	0	0	0	2	2
BW	Kraniopsis	C. obliqua	11	8	4.58065	5.74194	4.96774	0.797753	1.15584	6	66.6667	0	0	1	0	1	0	0	0	2	2
BW	Kraniopsis	C. obliqua	11	8	4.58065	5.41935	4.96774	0.845238	1.09091	6	50	0	0	1	0	1	0	0	0	2	2
BW	Kraniopsis	C. obliqua	11	8	4.90323	5.29032	5.03226	0.926829	1.05128	8	12.5	0	0	1	0	1	0	0	0	2	2
BW	Kraniopsis	C. obliqua	11	8	4.58065	4.83871	4.51613	0.946667	1.07143	6	50	0	0	1	0	1	0	0	0	2	2
BW	Kraniopsis	C. obliqua	11	8	4.19355	5.16129	4.58065	0.8125	1.12676	8	25	0	0	1	0	1	0	0	0	2	2
BW	Kraniopsis	C. obliqua	11	8	4.45161	4.96774	4	0.896104	1.24194	7	14.2857	0	0	1	0	1	0	1	0	2	2
BW	Kraniopsis	C. obliqua	11	8	5.6129	5.6129	4.83871	1	1.16	8	37.5	0	0	1	0	1	0	0	0	2	2
BW	Kraniopsis	C. obliqua	11	8	4.64516	5.09677	4.25806	0.911392	1.19697	8	37.5	0	0	1	0	1	0	1	0	2	2
BW	Kraniopsis	C. obliqua	11	8	4.77419	5.74194	4.77419	0.831461	1.2027	8	25	0	0	1	0	1	0	0	0	2	2
BW	Kraniopsis	C. obliqua	11	8	4.51613	5.09677	4.32258	0.886076	1.1791	8	37.5	0	0	1	0	1	0	0	0	2	2
BW	Kraniopsis	C. obliqua	11	8	4.3871	5.67742	4.83871	0.772727	1.17333	8	37.5	0	0	1	0	1	0	1	0	2	2
BW	Kraniopsis	C. obliqua	11	8	5.09677	5.16129	4.25806	0.9875	1.21212	8	12.5	0	0	1	0	1	0	1	0	2	2
BW	Kraniopsis	C. obliqua	11	8	4.51613	5.29032	4.70968	0.853659	1.12329	6	33.3333	0	0	1	0	1	0	0	0	2	2
BW	Kraniopsis	C. obliqua	11	8	4.90323	5.54839	5.16129	0.883721	1.075	6	33.3333	0	0	1	0	1	0	0	0	2	2
BW	Kraniopsis	C. obliqua	11	8	4.77419	5.22581	4.45161	0.91358	1.17391	8	12.5	0	0	1	0	1	0	0	0	2	2
BW	Kraniopsis	C. obliqua	11	8	4.19355	5.09677	4.45161	0.822785	1.14493	8	37.5	0	0	1	0	1	0	0	0	2	2
BW	Kraniopsis	C. obliqua	11	8	4.77419	5.16129	4.3871	0.925	1.17647	8	12.5	0	0	1	0	1	0	1	0	2	2
BW	Kraniopsis	C. obliqua	11	8	4.06452	5.67742	4.77419	0.715909	1.18919	7	57.1429	0	0	1	0	1	0	0	0	2	2
BW	Kraniopsis	C. obliqua	11	8	4.64516	5.29032	4.70968	0.878049	1.12329	7	28.5714	0	0	1	0	1	0	0	0	2	2
BW	Kraniopsis	C. obliqua	11	8	4.3871	5.16129	4.83871	0.85	1.06667	6	66.6667	0	0	1	0	1	0	0	0	2	2
BW	Kraniopsis	C. obliqua	11	8	4.3871	4.45161	4.32258	0.985507	1.02985	7	28.5714	0	0	1	0	1	0	0	0	2	2
BW	Kraniopsis	C. obliqua	11	8	4.25806	5.6129	4.83871	0.758621	1.16	7	28.5714	0	0	1	0	1	0	1	0	2	2
BW	Kraniopsis	C. obliqua	11	8	4.32258	5.16129	4.70968	0.8375	1.09589	5	60	0	0	1	0	1	0	0	0	2	2
BW	Kraniopsis	C. obliqua	11	8	4.51613	4.70968	4.19355	0.958904	1.12308	6	50	0	0	1	0	1	0	1	0	2	2
BW	Kraniopsis	C. obliqua	11	8	4.64516	5.35484	4.58065	0.86747	1.16901	7	28.5714	0	0	1	0	1	0	0	0	2	2
BW	Kraniopsis	C. obliqua	11	9	5.87097	5.48387	5.29032	1.07059	1.03659	6	66.6667	0	0	1	0	1	0	0	0	2	2
BW	Kraniopsis	C. obliqua	11	9	5.41935	6	5.03226	0.903226	1.19231	8	37.5	0	0	1	0	1	0	1	0	2	2
BW	Kraniopsis	C. obliqua	11	9	6.12903	5.93548	4.90323	1.03261	1.21053	6	50	0	0	1	0	1	0	0	0	2	2
BW	Kraniopsis	C. obliqua	11	9	5.6129	5.74194	5.54839	0.977528	1.03488	8	50	0.346667	0.56	1	1	1	0	0	0	2	2
BW	Kraniopsis	C. obliqua	11	9	5.6129	5.74194	5.03226	0.977528	1.14103	7	28.5714	0	0	1	0	1	0	0	0	2	2
BW	Kraniopsis	C. obliqua	11	9	5.80645	6.45161	6.06452	0.9	1.06383	8	12.5	0	0	1	0	1	0	1	0	2	2
BW	Kraniopsis	C. obliqua	11	9	6.51613	5.6129	5.74194	1.16092	0.977528	7	28.5714	0	0	1	0	1	0	0	0	2	2
BW	Kraniopsis	C. obliqua	11	9	5.80645	5.41935	5.03226	1.07143	1.07692	8	25	0	0	1	0	1	0	0	0	2	2
BW	Kraniopsis	C. obliqua	11	9	6.19355	5.80645	5.22581	1.06667	1.11111	7	42.8571	0	0	1	0	1	0	0	0	2	2
BW	Kraniopsis	C. obliqua	11	9	5.16129	5.80645	4.90323	0.888889	1.18421	8	12.5	0	0	1	0	1	0	0	0	2	2
BW	Kraniopsis	C. obliqua	11	9	5.09677	4.32258	4.58065	1.1791	0.943662	6	66.6667	0	0	1	0	1	0	0	0	2	2
BW	Kraniopsis	C. obliqua	11	9	4.12903	4.3871	3.80645	0.941176	1.15254	7	57.1429	0.8	1.12	1	1	1	0	0	0	2	2
BW	Kraniopsis	C. obliqua	11	9	3.67742	4.25806	4	0.863636	1.06452	8	25	0.533333	1.12	1	1	1	0	0	0	2	2
BW	Kraniopsis	C. obliqua	11	9	4.19355	4.32258	4.12903	0.970149	1.04688	7	28.5714	0.533333	0.986667	1	1	1	0	0	0	2	2
BW	Kraniopsis	C. obliqua	11	9	4.32258	3.87097	4	1.11667	0.967742	6	66.6667	0.613333	1.09333	1	1	1	0	0	0	2	2
BW	Kraniopsis	C. obliqua	11	9	4.83871	4	4.25806	1.20968	0.939394	6	66.6667	0.693333	1.01333	1	1	1	0	0	0	2	2
BW	Kraniopsis	C. obliqua	11	9	4.19355	4.12903	3.87097	1.01562	1.06667	8	62.5	0.293333	0.96	1	1	1	0	0	0	2	2
BW	Kraniopsis	C. obliqua	11	9	3.48387	4.12903	3.35484	0.84375	1.23077	5	80	0.746667	0.933333	1	1	1	0	0	0	2	2
BW	Kraniopsis	C. obliqua	11	9	4.58065	3.74194	4.25806	1.22414	0.878788	7	57.1429	0.293333	0.906667	1	1	1	0	0	0	2	2
BW	Kraniopsis	C. obliqua	11	9	4.32258	4.06452	3.74194	1.06349	1.08621	7	28.5714	0.506667	1.06667	1	1	1	0	0	0	2	2
BW	Kraniopsis	C. obliqua	11	9	3.80645	3.67742	3.74194	1.03509	0.982759	8	12.5	0.8	1.04	1	1	1	0	0	0	2	2
BW	Kraniopsis	C. obliqua	11	9	3.80645	3.80645	3.41935	1	1.11321	8	37.5	0.426667	0.826667	1	1	1	0	0	0	2	2
BW	Kraniopsis	C. obliqua	11	9	4	3.29032	3.41935	1.21569	0.962264	7	71.4286	0.426667	0.88	1	1	1	0	0	0	2	2
BW	Kraniopsis	C. obliqua	11	9	3.6129	4.19355	3.80645	0.861538	1.10169	6	66.6667	0.613333	1.09333	1	1	1	0	1	0	2	2
BW	Kraniopsis	C. obliqua	11	9	4.51613	3.87097	3.6129	1.16667	1.07143	7	42.8571	0.48	0.746667	1	1	1	0	0	0	2	2
BW	Kraniopsis	C. obliqua	11	9	3.54839	3.93548	3.87097	0.901639	1.01667	6	50	0.533333	1.06667	1	1	1	0	0	0	2	2
BW	Kraniopsis	C. obliqua	11	9	6.32258	6.25806	5.29032	1.01031	1.18293	7	28.5714	0	0	1	0	1	0	0	0	2	2
BW	Kraniopsis	C. obliqua	11	9	6.06452	5.35484	5.48387	1.13253	0.976471	8	12.5	0	0	1	0	1	0	0	0	2	2
BW	Kraniopsis	C. obliqua	11	9	5.29032	5.93548	5.41935	0.891304	1.09524	6	66.6667	0	0	1	0	1	0	0	0	2	2
BW	Kraniopsis	C. obliqua	11	9	5.6129	5.74194	5.16129	0.977528	1.1125	7	28.5714	0	0	1	0	1	0	0	0	2	2
BW	Kraniopsis	C. obliqua	11	10	4.3871	3.6129	3.54839	1.21429	1.01818	7	28.5714	0	0	1	0	1	0	0	2	3	2
BW	Kraniopsis	C. obliqua	11	10	4.3871	3.22581	3.22581	1.36	1	7	28.5714	0	0	1	0	1	0	0	2	3	2
BW	Kraniopsis	C. obliqua	11	10	3.80645	3.48387	3.22581	1.09259	1.08	7	42.8571	0	0	1	0	1	0	0	2	3	2
BW	Kraniopsis	C. obliqua	11	10	4.32258	3.35484	3.54839	1.28846	0.945455	6	83.3333	0	0	1	0	1	0	0	2	3	2
BW	Kraniopsis	C. obliqua	11	10	4.25806	3.74194	3.6129	1.13793	1.03571	6	33.3333	0	0	1	0	1	0	0	2	3	2
BW	Kraniopsis	C. obliqua	11	10	3.74194	3.48387	3.29032	1.07407	1.05882	6	66.6667	0	0	1	0	1	0	0	2	3	2
BW	Kraniopsis	C. obliqua	11	10	3.74194	3.16129	3.22581	1.18367	0.98	6	83.3333	0	0	1	0	1	0	0	2	3	2
BW	Kraniopsis	C. obliqua	11	10	4	3.35484	3.29032	1.19231	1.01961	6	33.3333	0.373333	0.72	1	1	1	0	0	2	3	2
BW	Kraniopsis	C. obliqua	11	10	3.93548	3.22581	3.09677	1.22	1.04167	7	14.2857	0	0	1	0	1	0	0	2	3	2
BW	Kraniopsis	C. obliqua	11	10	3.93548	3.35484	3.16129	1.17308	1.06122	8	50	0	0	1	0	1	0	0	2	3	2
BW	Kraniopsis	C. obliqua	11	10	4.12903	3.48387	3.54839	1.18519	0.981818	7	14.2857	0	0	1	0	1	0	0	2	3	2
BW	Kraniopsis	C. obliqua	11	10	4.19355	3.80645	3.48387	1.10169	1.09259	8	0	0	0	0	0	1	0	0	2	3	2
BW	Kraniopsis	C. obliqua	11	10	4.77419	3.54839	3.48387	1.34545	1.01852	8	0	0	0	0	0	1	0	0	2	3	2
BW	Kraniopsis	C. obliqua	11	10	4.19355	3.29032	3.6129	1.27451	0.910714	7	14.2857	0	0	1	0	1	0	0	2	2	2
BW	Kraniopsis	C. obliqua	11	10	4.25806	3.74194	3.67742	1.13793	1.01754	8	12.5	0	0	1	0	1	0	0	2	2	2
BW	Kraniopsis	C. obliqua	11	10	4	3.35484	3.22581	1.19231	1.04	7	14.2857	0	0	1	0	1	0	0	2	2	2
BW	Kraniopsis	C. obliqua	11	10	3.67742	3.41935	3.09677	1.07547	1.10417	6	50	0	0	1	0	1	0	0	2	2	2
BW	Kraniopsis	C. obliqua	11	10	4.25806	3.16129	3.35484	1.34694	0.942308	8	12.5	0	0	1	0	1	0	0	2	2	2
BW	Kraniopsis	C. obliqua	11	10	3.87097	3.48387	3.09677	1.11111	1.125	8	37.5	0	0	1	0	1	0	0	2	2	2
BW	Kraniopsis	C. obliqua	11	10	4.19355	3.41935	3.35484	1.22642	1.01923	8	25	0	0	1	0	1	0	0	2	2	2
BW	Kraniopsis	C. obliqua	11	10	3.48387	3.35484	3.29032	1.03846	1.01961	8	25	0	0	1	0	1	0	0	2	2	2
BW	Kraniopsis	C. obliqua	11	10	3.74194	3.48387	3.22581	1.07407	1.08	8	12.5	0	0	1	0	1	0	0	2	2	2
BW	Kraniopsis	C. obliqua	11	10	3.6129	3.22581	2.96774	1.12	1.08696	5	60	0	0	1	0	1	0	0	2	2	2
BW	Kraniopsis	C. obliqua	11	10	3.74194	3.29032	3.09677	1.13725	1.0625	7	14.2857	0	0	1	0	1	0	0	2	2	2
BW	Kraniopsis	C. obliqua	11	10	3.67742	3.29032	3.35484	1.11765	0.980769	6	50	0	0	1	0	1	0	0	2	2	2
BW	Kraniopsis	C. obliqua	11	10	3.93548	3.54839	3.54839	1.10909	1	7	28.5714	0	0	1	0	1	0	0	2	2	2
BW	Kraniopsis	C. obliqua	11	10	4	3.29032	3.03226	1.21569	1.08511	7	28.5714	0	0	1	0	1	0	0	2	2	2
BW	Kraniopsis	C. obliqua	11	10	4.06452	3.67742	3.54839	1.10526	1.03636	5	60	0	0	1	0	1	0	0	2	2	2
BW	Kraniopsis	C. obliqua	11	10	3.87097	3.41935	3.16129	1.13208	1.08163	7	42.8571	0	0	1	0	1	0	0	2	2	2
BW	Kraniopsis	C. obliqua	11	10	4.32258	3.74194	3.74194	1.15517	1	8	0	0	0	0	0	1	0	0	2	2	2
BW	Kraniopsis	C. occidentalis	13	1	4.12903	4.06452	3.09677	1.01587	1.3125	6	0	0	0	0	0	0	1	1	3	2	1
BW	Kraniopsis	C. occidentalis	13	1	4.32258	4	3.29032	1.08065	1.21569	7	0	0	0	0	0	0	1	1	3	2	1
BW	Kraniopsis	C. occidentalis	13	1	4	4.06452	2.70968	0.984127	1.5	8	12.5	0	0	1	0	0	1	2	3	3	1
BW	Kraniopsis	C. occidentalis	13	1	4	3.67742	2.96774	1.08772	1.23913	7	42.8571	0	0	1	0	0	1	1	0	3	1
BW	Kraniopsis	C. occidentalis	13	1	4.3871	3.93548	2.64516	1.11475	1.4878	5	0	0	0	0	0	0	1	2	0	3	1
BW	Kraniopsis	C. occidentalis	13	2	3.22581	4.32258	2.77419	0.746269	1.55814	8	25	0	0	1	0	0	0	2	0	2	1
BW	Kraniopsis	C. occidentalis	13	2	3.80645	5.09677	3.54839	0.746835	1.43636	7	100	0	0	1	0	0	0	1	0	2	1
BW	Kraniopsis	C. occidentalis	13	2	3.87097	5.03226	3.6129	0.769231	1.39286	8	37.5	0	0	1	0	0	0	1	0	3	1
BW	Kraniopsis	C. occidentalis	13	3	4.45161	4.32258	2.90323	1.02985	1.48889	8	37.5	0	0	1	0	0	1	2	0	1	1
BW	Kraniopsis	C. occidentalis	13	3	4.06452	4.58065	3.09677	0.887324	1.47917	8	0	0	0	0	0	0	1	2	3	2	1
BW	Kraniopsis	C. occidentalis	13	3	4.70968	4.64516	3.16129	1.01389	1.46939	8	37.5	0	0	1	0	0	1	2	0	1	1
BW	Kraniopsis	C. occidentalis	13	4	4	4.51613	3.09677	0.885714	1.45833	8	12.5	0	0	1	0	0	1	2	3	2	1
BW	Kraniopsis	C. occidentalis	13	4	3.93548	4.19355	3.22581	0.938462	1.3	8	0	0	0	0	0	0	1	2	3	2	1
BW	Kraniopsis	C. occidentalis	13	4	3.6129	4.83871	3.29032	0.746667	1.47059	8	12.5	0	0	1	0	0	1	2	3	2	1
BW	Kraniopsis	C. occidentalis	13	4	3.67742	4.70968	3.09677	0.780822	1.52083	8	25	0	0	1	0	0	1	2	3	2	1
BW	Kraniopsis	C. occidentalis	13	4	3.93548	4.51613	3.09677	0.871429	1.45833	8	12.5	0	0	1	0	0	1	2	3	2	1
BW	Kraniopsis	C. occidentalis	13	5	4.25806	4.77419	3.35484	0.891892	1.42308	8	37.5	0	0	1	0	0	1	2	0	2	1
BW	Kraniopsis	C. occidentalis	13	5	4.51613	5.29032	3.29032	0.853659	1.60784	9	11.1111	0	0	1	0	0	0	2	0	3	1
BW	Kraniopsis	C. occidentalis	13	5	4.51613	4.70968	3.22581	0.958904	1.46	8	25	0	0	1	0	0	1	2	0	3	1
BW	Kraniopsis	C. occidentalis	13	5	4.64516	4.70968	3.09677	0.986301	1.52083	8	50	0	0	1	0	0	0	2	0	3	1
BW	Kraniopsis	C. occidentalis	13	5	4.77419	4.70968	3.41935	1.0137	1.37736	8	25	0	0	1	0	0	1	2	0	3	1
BW	Kraniopsis	C. occidentalis	13	6	5.93548	5.03226	3.74194	1.17949	1.34483	8	0	0	0	0	0	0	1	2	1	3	1
BW	Kraniopsis	C. occidentalis	13	6	5.93548	4.19355	3.54839	1.41538	1.18182	8	0	0	0	0	0	0	1	2	1	1	1
BW	Kraniopsis	C. occidentalis	13	6	4.64516	4.70968	3.35484	0.986301	1.40385	8	50	0	0	1	0	0	1	2	0	0	1
BW	Kraniopsis	C. occidentalis	13	6	5.54839	4.96774	3.48387	1.11688	1.42593	8	0	0	0	0	0	0	1	2	0	0	1
BW	Kraniopsis	C. occidentalis	13	7	4.45161	4.32258	2.96774	1.02985	1.45652	8	50	0	0	1	0	0	1	2	3	3	1
BW	Kraniopsis	C. occidentalis	13	7	5.16129	4.77419	3.80645	1.08108	1.25424	8	62.5	0	0	1	0	0	1	1	3	1	1
BW	Kraniopsis	C. occidentalis	13	7	4.64516	4.32258	3.48387	1.07463	1.24074	8	62.5	0	0	1	0	0	1	2	3	3	1
BW	Kraniopsis	C. occidentalis	13	8	3.54839	4.12903	2.45161	0.859375	1.68421	8	25	0	0	1	0	0	0	2	0	0	1
BW	Kraniopsis	C. occidentalis	13	8	3.41935	4.58065	2.83871	0.746479	1.61364	7	28.5714	0	0	1	0	0	0	2	0	2	1
BW	Kraniopsis	C. occidentalis	13	8	3.35484	4.58065	3.22581	0.732394	1.42	8	12.5	0	0	1	0	0	1	2	3	2	1
BW	Kraniopsis	C. occidentalis	13	8	3.54839	4.19355	3.03226	0.846154	1.38298	8	25	0	0	1	0	0	1	2	0	0	1
BW	Kraniopsis	C. occidentalis	13	8	2.96774	4.19355	2.83871	0.707692	1.47727	9	22.2222	0	0	1	0	0	0	2	3	2	1
BW	Kraniopsis	C. occidentalis	13	8	3.74194	4.19355	2.70968	0.892308	1.54762	8	12.5	0	0	1	0	0	0	2	3	2	1
BW	Kraniopsis	C. occidentalis	13	9	4.45161	3.80645	2.90323	1.16949	1.31111	8	0	0	0	0	0	0	1	2	0	0	1
BW	Kraniopsis	C. occidentalis	13	9	4.96774	4	2.77419	1.24194	1.44186	8	62.5	0	0	1	0	0	1	2	0	0	1
BW	Kraniopsis	C. occidentalis	13	9	5.74194	4.12903	2.83871	1.39062	1.45455	7	57.1429	0	0	1	0	0	1	2	0	0	1
BW	Kraniopsis	C. occidentalis	13	9	4.77419	4.32258	2.64516	1.10448	1.63415	8	25	0	0	1	0	0	1	2	0	0	1
BW	Kraniopsis	C. occidentalis	13	9	3.74194	4.25806	2.96774	0.878788	1.43478	8	12.5	0	0	1	0	0	0	2	0	0	1
BW	Kraniopsis	C. occidentalis	13	9	4	4.32258	2.83871	0.925373	1.52273	8	0	0	0	0	0	0	0	2	0	0	1
BW	Kraniopsis	C. occidentalis	13	9	5.22581	4.83871	3.09677	1.08	1.5625	8	0	0	0	0	0	0	0	2	0	0	1
BW	Kraniopsis	C. occidentalis	13	9	5.03226	3.35484	3.16129	1.5	1.06122	8	0	0	0	0	0	0	1	0	0	0	1
BW	Kraniopsis	C. occidentalis	13	9	4.77419	4.12903	3.16129	1.15625	1.30612	8	12.5	0	0	1	0	0	1	2	0	0	1
BW	Kraniopsis	C. occidentalis	13	9	4.96774	4.70968	3.09677	1.05479	1.52083	6	33.3333	0	0	1	0	0	1	2	0	0	1
BW	Kraniopsis	C. occidentalis	13	9	4.25806	3.80645	2.70968	1.11864	1.40476	8	0	0	0	0	0	0	1	2	0	0	1
BW	Kraniopsis	C. occidentalis	13	9	5.22581	4	2.70968	1.30645	1.47619	8	0	0	0	0	0	0	1	2	0	0	1
BW	Kraniopsis	C. occidentalis	13	9	5.22581	4.12903	2.96774	1.26562	1.3913	8	0	0	0	0	0	0	1	2	0	0	1
BW	Kraniopsis	C. occidentalis	13	9	4.19355	4.19355	3.03226	1	1.38298	7	28.5714	0	0	1	0	0	1	2	0	0	1
BW	Kraniopsis	C. occidentalis	13	9	5.6129	4.32258	2.90323	1.29851	1.48889	8	25	0	0	1	0	0	0	2	0	0	1
BW	Kraniopsis	C. occidentalis	13	9	4.64516	4.51613	2.96774	1.02857	1.52174	8	0	0	0	0	0	0	0	2	0	0	1
BW	Kraniopsis	C. occidentalis	13	9	5.41935	4.19355	3.35484	1.29231	1.25	7	28.5714	0	0	1	0	0	1	2	0	0	1
BW	Kraniopsis	C. occidentalis	13	9	4.64516	4	2.77419	1.16129	1.44186	8	12.5	0	0	1	0	0	1	2	0	0	1
BW	Kraniopsis	C. occidentalis	13	9	4.19355	4.51613	3.22581	0.928571	1.4	8	25	0	0	1	0	0	0	2	0	0	1
BW	Kraniopsis	C. occidentalis	13	9	4.77419	4.3871	2.96774	1.08824	1.47826	7	14.2857	0	0	1	0	0	1	2	0	0	1
BW	Kraniopsis	C. occidentalis	13	9	4.58065	4.45161	2.77419	1.02899	1.60465	8	0	0	0	0	0	0	1	2	0	0	1
BW	Kraniopsis	C. occidentalis	13	9	5.29032	3.93548	2.64516	1.34426	1.4878	8	0	0	0	0	0	0	1	2	0	0	1
BW	Kraniopsis	C. occidentalis	13	9	4.90323	4.06452	2.90323	1.20635	1.4	8	0	0	0	0	0	0	1	2	0	0	1
BW	Kraniopsis	C. occidentalis	13	9	4.06452	4.3871	2.90323	0.926471	1.51111	8	0	0	0	0	0	0	1	2	0	0	1
BW	Kraniopsis	C. occidentalis	13	9	4.51613	4.12903	2.64516	1.09375	1.56098	8	12.5	0	0	1	0	0	1	2	0	0	1
BW	Kraniopsis	C. occidentalis	13	9	4.70968	4.51613	2.70968	1.04286	1.66667	7	14.2857	0	0	1	0	0	1	2	0	0	1
BW	Kraniopsis	C. occidentalis	13	9	4.12903	4.58065	3.09677	0.901408	1.47917	7	28.5714	0	0	1	0	0	1	2	0	0	1
BW	Kraniopsis	C. occidentalis	13	9	3.48387	3.93548	2.77419	0.885246	1.4186	8	12.5	0	0	1	0	0	1	2	0	0	1
BW	Kraniopsis	C. occidentalis	13	9	5.67742	3.74194	3.29032	1.51724	1.13725	8	0	0	0	0	0	0	1	2	0	0	1
BW	Kraniopsis	C. occidentalis	13	9	4.83871	4.32258	3.29032	1.1194	1.31373	8	0	0	0	0	0	0	0	2	0	0	1
BW	Kraniopsis	C. occidentalis	13	10	4.58065	5.6129	3.48387	0.816092	1.61111	8	12.5	0	0	1	0	0	1	2	0	0	1
BW	Kraniopsis	C. occidentalis	13	10	4.58065	5.29032	3.16129	0.865854	1.67347	8	0	0	0	0	0	0	1	2	0	0	1
BW	Kraniopsis	C. occidentalis	13	10	4.70968	5.6129	3.29032	0.83908	1.70588	8	0	0	0	0	0	0	1	2	0	0	1
BW	Kraniopsis	C. occidentalis	13	10	4	4.83871	3.16129	0.826667	1.53061	8	37.5	0	0	1	0	0	1	2	0	0	1
BW	Kraniopsis	C. occidentalis	13	10	4.3871	5.54839	3.22581	0.790698	1.72	8	0	0	0	0	0	0	1	2	0	0	1
BW	Kraniopsis	C. occidentalis	13	10	5.16129	5.93548	3.35484	0.869565	1.76923	8	25	0	0	1	0	0	1	2	0	0	1
BW	Kraniopsis	C. occidentalis	13	10	4.64516	5.03226	3.09677	0.923077	1.625	8	0	0	0	0	0	0	1	2	0	0	1
BW	Kraniopsis	C. occidentalis	13	10	4.58065	5.16129	2.83871	0.8875	1.81818	8	0	0	0	0	0	0	1	2	0	0	1
BW	Kraniopsis	C. occidentalis	13	10	4.83871	5.54839	3.29032	0.872093	1.68627	7	42.8571	0	0	1	0	0	1	2	0	0	1
BW	Kraniopsis	C. occidentalis	13	10	4.06452	5.09677	3.09677	0.797468	1.64583	8	0	0	0	0	0	0	1	2	0	0	1
BW	Kraniopsis	C. occidentalis	13	10	4.83871	5.22581	3.09677	0.925926	1.6875	8	0	0	0	0	0	0	1	2	0	0	1
BW	Kraniopsis	C. occidentalis	13	10	4.77419	5.09677	3.03226	0.936709	1.68085	8	0	0	0	0	0	0	1	2	0	0	1
BW	Kraniopsis	C. occidentalis	13	10	5.29032	5.54839	3.16129	0.953488	1.7551	8	12.5	0	0	1	0	0	1	2	0	0	1
BW	Kraniopsis	C. occidentalis	13	10	4.77419	6.06452	3.54839	0.787234	1.70909	7	42.8571	0	0	1	0	0	1	2	0	0	1
BW	Kraniopsis	C. occidentalis	13	10	4.58065	5.54839	2.96774	0.825581	1.86957	8	0	0	0	0	0	0	1	2	0	0	1
BW	Kraniopsis	C. occidentalis	13	10	4.3871	5.16129	2.96774	0.85	1.73913	8	0	0	0	0	0	0	1	2	3	0	1
BW	Kraniopsis	C. occidentalis	13	10	4.90323	5.16129	2.77419	0.95	1.86047	8	0	0	0	0	0	0	1	2	3	0	1
BW	Kraniopsis	C. occidentalis	13	10	4.45161	5.09677	3.03226	0.873418	1.68085	8	12.5	0	0	1	0	0	1	2	3	0	1
BW	Kraniopsis	C. occidentalis	13	10	4.70968	5.16129	2.96774	0.9125	1.73913	8	25	0	0	1	0	0	1	2	3	0	1
BW	Kraniopsis	C. occidentalis	13	10	4.83871	5.29032	2.90323	0.914634	1.82222	8	12.5	0	0	1	0	0	1	2	3	0	1
BW	Kraniopsis	C. occidentalis	13	10	4.70968	4.77419	2.96774	0.986486	1.6087	8	12.5	0	0	1	0	0	1	2	3	0	1
BW	Kraniopsis	C. occidentalis	13	10	4.70968	4.90323	2.77419	0.960526	1.76744	8	25	0	0	1	0	0	1	2	3	0	1
BW	Kraniopsis	C. occidentalis	13	10	4.83871	5.48387	3.09677	0.882353	1.77083	6	50	0	0	1	0	0	1	2	3	0	1
BW	Kraniopsis	C. occidentalis	13	10	4.64516	5.29032	3.09677	0.878049	1.70833	8	12.5	0	0	1	0	0	1	2	3	0	1
BW	Kraniopsis	C. occidentalis	13	10	4.83871	5.80645	3.41935	0.833333	1.69811	8	0	0	0	0	0	0	1	2	3	0	1
BW	Kraniopsis	C. occidentalis	13	10	4.3871	5.48387	2.90323	0.8	1.88889	8	12.5	0	0	1	0	0	1	2	3	0	1
BW	Kraniopsis	C. occidentalis	13	10	5.35484	5.54839	3.22581	0.965116	1.72	8	0	0	0	0	0	0	1	2	3	0	1
BW	Kraniopsis	C. occidentalis	13	10	4.77419	5.29032	3.29032	0.902439	1.60784	8	0	0	0	0	0	0	1	2	3	0	1
BW	Kraniopsis	C. occidentalis	13	10	4.70968	4.96774	3.09677	0.948052	1.60417	8	0	0	0	0	0	0	1	2	3	0	1
BW	Kraniopsis	C. occidentalis	13	10	5.09677	5.80645	3.6129	0.877778	1.60714	8	0	0	0	0	0	0	1	2	3	0	1
BW	Kraniopsis	C. occidentalis	13	11	4.70968	4.83871	2.90323	0.973333	1.66667	8	0	0	0	0	0	0	1	2	0	3	1
BW	Kraniopsis	C. occidentalis	13	11	4.58065	4.70968	2.90323	0.972603	1.62222	8	0	0	0	0	0	0	1	2	0	3	1
BW	Kraniopsis	C. occidentalis	13	11	4.19355	4.70968	2.83871	0.890411	1.65909	8	12.5	0	0	1	0	0	1	2	0	3	1
BW	Kraniopsis	C. occidentalis	13	11	4.70968	4.77419	3.16129	0.986486	1.5102	8	12.5	0	0	1	0	0	1	2	0	3	1
BW	Kraniopsis	C. occidentalis	13	11	4.64516	4.58065	2.70968	1.01408	1.69048	8	0	0	0	0	0	0	1	2	0	3	1
BW	Kraniopsis	C. occidentalis	13	11	4.3871	4.77419	2.77419	0.918919	1.72093	8	25	0	0	1	0	0	1	2	0	2	1
BW	Kraniopsis	C. occidentalis	13	11	4.45161	4.51613	2.70968	0.985714	1.66667	8	0	0	0	0	0	0	1	2	3	2	1
BW	Kraniopsis	C. occidentalis	13	11	4.70968	4.96774	3.16129	0.948052	1.57143	7	57.1429	0	0	1	0	0	1	2	0	3	1
BW	Kraniopsis	C. occidentalis	13	11	4.83871	4.3871	2.83871	1.10294	1.54545	8	0	0	0	0	0	0	1	2	0	3	1
BW	Kraniopsis	C. occidentalis	13	11	4.45161	4.64516	2.77419	0.958333	1.67442	8	12.5	0	0	1	0	0	1	2	0	3	1
BW	Kraniopsis	C. occidentalis	13	11	4.77419	5.09677	3.29032	0.936709	1.54902	8	12.5	0	0	1	0	0	1	2	0	3	1
BW	Kraniopsis	C. occidentalis	13	11	4.3871	5.03226	2.96774	0.871795	1.69565	8	0	0	0	0	0	0	1	2	0	3	1
BW	Kraniopsis	C. occidentalis	13	11	4.25806	5.09677	3.22581	0.835443	1.58	8	25	0	0	1	0	0	1	2	0	3	1
BW	Kraniopsis	C. occidentalis	13	11	4.77419	4.90323	2.70968	0.973684	1.80952	8	12.5	0	0	1	0	0	1	2	0	3	1
BW	Kraniopsis	C. occidentalis	13	11	4.90323	5.16129	3.16129	0.95	1.63265	8	0	0	0	0	0	0	1	2	0	3	1
BW	Kraniopsis	C. occidentalis	13	11	4.25806	5.41935	2.70968	0.785714	2	8	25	0	0	1	0	0	1	2	0	2	1
BW	Kraniopsis	C. occidentalis	13	11	4.83871	4.83871	3.35484	1	1.44231	6	50	0	0	1	0	0	1	2	0	2	1
BW	Kraniopsis	C. occidentalis	13	11	4.32258	4.64516	3.16129	0.930556	1.46939	8	25	0	0	1	0	0	1	2	0	2	1
BW	Kraniopsis	C. occidentalis	13	11	4.45161	5.16129	3.09677	0.8625	1.66667	8	12.5	0	0	1	0	0	1	2	0	2	1
BW	Kraniopsis	C. occidentalis	13	11	4.96774	4.90323	3.16129	1.01316	1.55102	7	71.4286	0	0	1	0	0	1	2	0	2	1
BW	Kraniopsis	C. occidentalis	13	11	4.51613	4.64516	3.29032	0.972222	1.41176	8	25	0	0	1	0	0	1	2	0	2	1
BW	Kraniopsis	C. occidentalis	13	11	4.45161	5.09677	3.35484	0.873418	1.51923	6	100	0	0	1	0	0	1	2	0	3	1
BW	Kraniopsis	C. occidentalis	13	11	4.70968	5.16129	3.03226	0.9125	1.70213	8	37.5	0	0	1	0	0	1	2	0	3	1
BW	Kraniopsis	C. occidentalis	13	11	4.83871	5.16129	3.09677	0.9375	1.66667	8	37.5	0	0	1	0	0	1	2	0	3	1
BW	Kraniopsis	C. occidentalis	13	11	4.90323	4.51613	3.09677	1.08571	1.45833	8	50	0	0	1	0	0	1	2	0	3	1
BW	Kraniopsis	C. occidentalis	13	11	4.32258	4.64516	2.64516	0.930556	1.7561	8	50	0	0	1	0	0	1	2	0	3	1
BW	Kraniopsis	C. occidentalis	13	11	4.51613	4.83871	3.03226	0.933333	1.59574	7	42.8571	0	0	1	0	0	1	2	0	2	1
BW	Kraniopsis	C. occidentalis	13	11	3.93548	4.70968	2.64516	0.835616	1.78049	8	12.5	0	0	1	0	0	1	2	0	2	1
BW	Kraniopsis	C. occidentalis	13	11	4.12903	4.64516	2.70968	0.888889	1.71429	7	28.5714	0	0	1	0	0	1	2	0	2	1
BW	Kraniopsis	C. occidentalis	13	11	4.58065	4.58065	2.90323	1	1.57778	6	100	0	0	1	0	0	1	2	0	3	1
BW	Kraniopsis	C. racemosa	14	1	4.25806	4.51613	3.74194	0.942857	1.2069	7	57.1429	0	0	1	0	0	0	1	3	2	1
BW	Kraniopsis	C. racemosa	14	1	4.12903	4.3871	3.80645	0.941176	1.15254	8	37.5	0	0	1	0	0	0	1	3	2	1
BW	Kraniopsis	C. racemosa	14	1	4.06452	4.32258	3.6129	0.940299	1.19643	8	37.5	0	0	1	0	0	0	1	3	2	1
BW	Kraniopsis	C. racemosa	14	1	4.06452	4.45161	4.32258	0.913043	1.02985	8	75	0	0	1	0	0	0	1	3	2	1
BW	Kraniopsis	C. racemosa	14	1	4	4.25806	3.54839	0.939394	1.2	8	50	0	0	1	0	0	0	1	3	2	1
BW	Kraniopsis	C. racemosa	14	2	4.12903	4.45161	3.67742	0.927536	1.21053	8	0	0	0	0	0	0	0	1	3	2	1
BW	Kraniopsis	C. racemosa	14	2	4.12903	4.58065	3.6129	0.901408	1.26786	8	0	0	0	0	0	0	0	1	3	2	1
BW	Kraniopsis	C. racemosa	14	2	3.93548	4.06452	3.35484	0.968254	1.21154	8	37.5	0	0	1	0	0	0	1	3	2	1
BW	Kraniopsis	C. racemosa	14	2	4.06452	4.12903	3.41935	0.984375	1.20755	8	12.5	0	0	1	0	0	0	1	3	2	1
BW	Kraniopsis	C. racemosa	14	2	3.6129	3.87097	3.09677	0.933333	1.25	8	50	0	0	1	0	0	0	1	3	2	1
BW	Kraniopsis	C. racemosa	14	3	4.96774	4.25806	4.19355	1.16667	1.01538	8	0	0	0	0	0	0	0	0	3	0	1
BW	Kraniopsis	C. racemosa	14	3	4.70968	3.80645	3.54839	1.23729	1.07273	8	12.5	0	0	1	0	0	0	0	3	0	1
BW	Kraniopsis	C. racemosa	14	3	4.58065	3.93548	3.80645	1.16393	1.0339	8	37.5	0	0	1	0	0	0	0	3	3	1
BW	Kraniopsis	C. racemosa	14	3	4.77419	4	3.54839	1.19355	1.12727	8	0	0	0	0	0	0	0	0	3	3	1
BW	Kraniopsis	C. racemosa	14	3	4.90323	4.25806	4.12903	1.15152	1.03125	8	25	0	0	1	0	0	0	0	3	3	1
BW	Kraniopsis	C. racemosa	14	3	4.77419	4.25806	3.67742	1.12121	1.15789	9	0	0	0	0	0	0	0	0	3	2	1
BW	Kraniopsis	C. racemosa	14	4	4.25806	4.06452	3.74194	1.04762	1.08621	8	0	0	0	0	0	0	0	0	3	2	1
BW	Kraniopsis	C. racemosa	14	4	4.06452	4	3.67742	1.01613	1.08772	8	12.5	0	0	1	0	0	0	0	3	2	1
BW	Kraniopsis	C. racemosa	14	4	4.3871	3.93548	3.67742	1.11475	1.07018	8	12.5	0	0	1	0	0	0	0	3	2	1
BW	Kraniopsis	C. racemosa	14	4	4.06452	4	3.93548	1.01613	1.01639	8	25	0	0	1	0	0	0	1	3	2	1
BW	Kraniopsis	C. racemosa	14	4	4.58065	4.58065	4	1	1.14516	8	25	0	0	1	0	0	0	1	3	2	1
BW	Kraniopsis	C. racemosa	14	5	4.12903	4.70968	3.29032	0.876712	1.43137	8	37.5	0	0	1	0	0	0	1	2	2	1
BW	Kraniopsis	C. racemosa	14	5	3.54839	4.45161	3.35484	0.797101	1.32692	8	37.5	0	0	1	0	0	0	1	3	2	1
BW	Kraniopsis	C. racemosa	14	5	3.16129	3.93548	3.03226	0.803279	1.29787	9	33.3333	0	0	1	0	0	0	1	3	2	1
BW	Kraniopsis	C. racemosa	14	5	3.16129	4.12903	3.16129	0.765625	1.30612	8	12.5	0	0	1	0	0	0	1	3	2	1
BW	Kraniopsis	C. racemosa	14	5	3.87097	4.70968	3.80645	0.821918	1.23729	7	14.2857	0	0	1	0	0	0	1	3	2	1
[truncated: 1,847 more rows]

## Sheet: Anatomical data
Group	Subgenus	Species	Endocarp	GVT	SMW	WTP [%]	DCN
BW	Kraniopsis	C. alba	1	0.34955	0.156306	14.4238	not tested
BW	Kraniopsis	C. alba	2	0.364414	0.137838	14.3797	not tested		Trait	Description	Type of trait:	Units of
BW	Kraniopsis	C. alba	3	0.279279	0.126126	14.4019	not tested		abbreviation		continuous (C)	measurement
BW	Kraniopsis	C. alba	4	0.358456	0.162868	18.9652	not tested				discrete (D)
BW	Kraniopsis	C. alba	5	0.287132	0.165809	15.8386	not tested		GVT	Germination valve thickness	C	mm
BW	Kraniopsis	C. alba	6	0.291544	0.128676	14.1506	not tested		SMW	Septum width	C	mm
BW	Kraniopsis	C. alba	7	0.279044	0.132721	11.5913	not tested		WTP	Thickness of endocarp wall (germination valve) divided by endocarp diameter or multiplied by 100	C	%
BW	Kraniopsis	C. alba	8	0.304779	0.171691	16.2645	not tested		DCN	Number of cavities in endocarp wall	D
BW	Kraniopsis	C. alba	9	0.295221	0.151471	14.1448	not tested
BW	Kraniopsis	C. alba	10	0.444118	0.144853	14.2285	not tested
BW	Kraniopsis	C. alba	11	0.373529	0.152941	13.5142	not tested
BW	Kraniopsis	C. alba	12	0.213603	0.130147	14.1638	not tested
BW	Kraniopsis	C. alba	13	0.186029	0.172059	11.5896	not tested
BW	Kraniopsis	C. alba	14	0.558559	0.143243	18.1075	not tested
BW	Kraniopsis	C. alba	15	0.406757	0.137838	14.6069	not tested
BW	Mesomora	C. alternifolia	1	0.521675	0.316876	10.7489	not tested
BW	Mesomora	C. alternifolia	2	0.532963	0.348353	10.0509	not tested
BW	Mesomora	C. alternifolia	3	0.487403	0.27465	10.1297	not tested
BW	Mesomora	C. alternifolia	4	0.722175	0.34545	16.3413	not tested
BW	Mesomora	C. alternifolia	5	0.470527	0.270912	9.94296	not tested
BW	Mesomora	C. alternifolia	6	0.569173	0.26934	11.02	not tested
BW	Mesomora	C. alternifolia	7	0.486957	0.430983	10.3596	not tested
BW	Mesomora	C. alternifolia	8	0.514748	0.279851	11.4406	not tested
BW	Mesomora	C. alternifolia	9	0.549831	0.268498	12.1388	not tested
BW	Mesomora	C. alternifolia	10	0.725994	0.624229	13.5451	not tested
BW	Mesomora	C. alternifolia	11	0.581346	0.309244	11.8648	not tested
BW	Mesomora	C. alternifolia	12	0.702573	0.356208	14.8495	not tested
BW	Mesomora	C. alternifolia	13	0.5488	0.274594	11.9899	not tested
BW	Mesomora	C. alternifolia	14	0.378259	0.300897	8.00477	not tested
BW	Mesomora	C. alternifolia	15	0.592816	0.24358	13.0931	not tested
BW	Kraniopsis	C. amomum	1	0.40146	0.204511	10.5312	not tested
BW	Kraniopsis	C. amomum	2	0.375851	0.130876	9.75156	not tested
BW	Kraniopsis	C. amomum	3	0.445554	0.27539	11.5166	not tested
BW	Kraniopsis	C. amomum	4	0.72575	0.24603	17.6631	not tested
BW	Kraniopsis	C. amomum	5	0.69589	0.209086	16.7339	not tested
BW	Kraniopsis	C. amomum	6	0.625051	0.224244	17.2675	not tested
BW	Kraniopsis	C. amomum	7	0.536883	0.140482	12.2992	not tested
BW	Kraniopsis	C. amomum	8	0.318775	0.136004	9.32307	not tested
BW	Kraniopsis	C. amomum	9	0.311548	0.183874	9.37233	not tested
BW	Kraniopsis	C. amomum	10	0.440378	0.148279	11.9954	not tested
BW	Kraniopsis	C. amomum	11	0.332911	0.192888	11.257	not tested
BW	Kraniopsis	C. amomum	12	0.505081	0.16438	14.5954	not tested
BW	Kraniopsis	C. amomum	13	0.927995	0.222096	18.9632	not tested
BW	Kraniopsis	C. amomum	14	0.818946	0.309331	18.0084	not tested
BW	Kraniopsis	C. amomum	15	0.661378	0.275133	14.3674	not tested
BW	Kraniopsis	C. australis	1	0.402606	0.358755	9.41591	not tested
BW	Kraniopsis	C. australis	2	0.890587	0.440238	19.2351	not tested
BW	Kraniopsis	C. australis	3	0.442002	0.314549	10.867	not tested
BW	Kraniopsis	C. australis	4	0.754833	0.197382	17.433	not tested
BW	Kraniopsis	C. australis	5	0.781932	0.303191	18.6984	not tested
BW	Kraniopsis	C. australis	6	0.809525	0.184644	19.1947	not tested
BW	Kraniopsis	C. australis	7	0.538181	0.218669	13.3414	not tested
BW	Kraniopsis	C. australis	8	0.835444	0.196234	18.3103	not tested
BW	Kraniopsis	C. australis	9	0.673539	0.254542	17.672	not tested
BW	Kraniopsis	C. australis	10	0.617983	0.220214	17.7445	not tested
BW	Kraniopsis	C. australis	11	0.841256	0.234081	17.5919	not tested
BW	Kraniopsis	C. australis	12	0.672646	0.299552	14.7536	not tested
BW	Kraniopsis	C. australis	13	0.645291	0.280269	13.8286	not tested
BW	Kraniopsis	C. australis	14	0.677578	0.202691	14.8399	not tested
BW	Kraniopsis	C. australis	15	0.549776	0.211659	13.0648	not tested
BW	Kraniopsis	C. bretschneideri	1	0.302739	0.138786	10.2276	not tested
BW	Kraniopsis	C. bretschneideri	2	0.303354	0.189458	10.0378	not tested
BW	Kraniopsis	C. bretschneideri	3	0.212311	0.124217	7.32452	not tested
BW	Kraniopsis	C. bretschneideri	4	0.22342	0.214126	8.32064	not tested
BW	Kraniopsis	C. bretschneideri	5	0.287732	0.157993	10.801	not tested
BW	Kraniopsis	C. bretschneideri	6	0.22974	0.183271	9.014	not tested
BW	Kraniopsis	C. bretschneideri	7	0.317844	0.2	12.0626	not tested
BW	Kraniopsis	C. bretschneideri	8	0.214126	0.20632	8.82759	not tested
BW	Kraniopsis	C. bretschneideri	9	0.349442	0.179926	14.2511	not tested
BW	Kraniopsis	C. bretschneideri	10	0.435316	0.178067	17.4594	not tested
BW	Kraniopsis	C. bretschneideri	11	0.279182	0.178067	11.6869	not tested
BW	Kraniopsis	C. bretschneideri	12	0.460967	0.188476	18.9893	not tested
BW	Kraniopsis	C. bretschneideri	13	0.435688	0.129368	16.2982	not tested
BW	Kraniopsis	C. bretschneideri	14	0.304461	0.126394	11.8713	not tested
BW	Kraniopsis	C. bretschneideri	15	0.404833	0.122677	16.0785	not tested
BW	Mesomora	C. controversa	1	0.325902	0.168963	8.50421	not tested
BW	Mesomora	C. controversa	2	0.48262	0.2423	11.2345	not tested
BW	Mesomora	C. controversa	3	0.3188	0.213502	8.4707	not tested
BW	Mesomora	C. controversa	4	0.598979	0.219316	14.1734	not tested
BW	Mesomora	C. controversa	5	0.591599	0.262586	13.2529	not tested
BW	Mesomora	C. controversa	6	0.551168	0.119533	15.8589	not tested
BW	Mesomora	C. controversa	7	0.673817	0.174106	17.7971	not tested
BW	Mesomora	C. controversa	8	0.483832	0.162378	13.4404	not tested
BW	Mesomora	C. controversa	9	0.51075	0.189411	13.657	not tested
BW	Mesomora	C. controversa	10	0.531914	0.139924	15.936	not tested
BW	Mesomora	C. controversa	11	0.512108	0.143498	11.4751	not tested
BW	Mesomora	C. controversa	12	0.495067	0.157848	12.3878	not tested
BW	Mesomora	C. controversa	13	0.459193	0.216143	10.4757	not tested
BW	Mesomora	C. controversa	14	0.567265	0.160538	13.306	not tested
BW	Mesomora	C. controversa	15	0.589686	0.208969	14.6927	not tested
BW	Kraniopsis	C. drummondii	1	0.363042	0.154152	11.0233	not tested
BW	Kraniopsis	C. drummondii	2	0.462717	0.174508	14.3755	not tested
BW	Kraniopsis	C. drummondii	3	0.250222	0.198322	8.99037	not tested
BW	Kraniopsis	C. drummondii	4	0.739901	0.234707	21.0947	not tested
BW	Kraniopsis	C. drummondii	5	0.674128	0.179083	20.2224	not tested
BW	Kraniopsis	C. drummondii	6	0.716891	0.19691	21.5636	not tested
BW	Kraniopsis	C. drummondii	7	0.344204	0.176643	9.53606	not tested
BW	Kraniopsis	C. drummondii	8	0.443987	0.23451	13.0815	not tested
BW	Kraniopsis	C. drummondii	9	0.404733	0.190083	11.4784	not tested
BW	Kraniopsis	C. drummondii	10	0.445992	0.233119	12.7352	not tested
BW	Kraniopsis	C. drummondii	11	0.389009	0.22796	10.1301	not tested
BW	Kraniopsis	C. drummondii	12	0.443464	0.202034	12.6452	not tested
BW	Kraniopsis	C. drummondii	13	0.3934	0.164132	10.6041	not tested
BW	Kraniopsis	C. drummondii	14	0.622669	0.229763	16.4091	not tested
BW	Kraniopsis	C. drummondii	15	0.511753	0.147436	12.875	not tested
BW	Kraniopsis	C. foemina	1	0.522675	0.310582	12.7443	not tested
BW	Kraniopsis	C. foemina	2	0.745694	0.266092	15.6384	not tested
BW	Kraniopsis	C. foemina	3	0.616226	0.274385	12.9676	not tested
BW	Kraniopsis	C. foemina	4	0.604261	0.332276	14.3179	not tested
BW	Kraniopsis	C. foemina	5	0.663172	0.259344	14.492	not tested
BW	Kraniopsis	C. foemina	6	0.6299	0.308113	15.0119	not tested
BW	Kraniopsis	C. foemina	7	0.674111	0.30082	15.336	not tested
BW	Kraniopsis	C. foemina	8	0.593835	0.24388	14.6631	not tested
BW	Kraniopsis	C. foemina	9	0.628988	0.316773	14.0773	not tested
BW	Kraniopsis	C. foemina	10	0.416135	0.224704	11.4785	not tested
BW	Kraniopsis	C. foemina	11	0.424751	0.145512	12.9724	not tested
BW	Kraniopsis	C. foemina	12	0.543756	0.186418	16.1478	not tested
BW	Kraniopsis	C. foemina	13	0.37557	0.175934	11.8289	not tested
BW	Kraniopsis	C. foemina	14	0.421604	0.173655	13.1879	not tested
BW	Kraniopsis	C. foemina	15	0.501367	0.147675	15.0335	not tested
BW	Kraniopsis	C. macrophylla	1	0.358103	0.209485	9.45666	not tested
BW	Kraniopsis	C. macrophylla	2	0.367065	0.205004	10.6512	not tested
BW	Kraniopsis	C. macrophylla	3	0.334951	0.226288	9.64205	not tested
BW	Kraniopsis	C. macrophylla	4	0.339432	0.175504	9.31066	not tested
BW	Kraniopsis	C. macrophylla	5	0.366692	0.199776	9.72374	not tested
BW	Kraniopsis	C. macrophylla	6	0.346855	0.185506	9.75391	not tested
BW	Kraniopsis	C. macrophylla	7	0.365998	0.218778	10.691	not tested
BW	Kraniopsis	C. macrophylla	8	0.487694	0.201459	12.7426	not tested
BW	Kraniopsis	C. macrophylla	9	0.444394	0.175934	11.7768	not tested
BW	Kraniopsis	C. macrophylla	10	0.473108	0.217867	13.073	not tested
BW	Kraniopsis	C. macrophylla	11	0.584777	0.224704	14.1331	not tested
BW	Kraniopsis	C. macrophylla	12	0.533728	0.267548	13.0068	not tested
BW	Kraniopsis	C. macrophylla	13	0.6299	0.260255	14.4515	not tested
BW	Kraniopsis	C. macrophylla	14	0.617593	0.268915	14.3858	not tested
BW	Kraniopsis	C. macrophylla	15	0.548314	0.236554	13.7911	not tested
BW	Kraniopsis	C. obliqua	1	0.263857	0.159872	6.56934	not tested
BW	Kraniopsis	C. obliqua	2	0.194686	0.140632	5.19751	not tested
BW	Kraniopsis	C. obliqua	3	0.344938	0.147503	8.93662	not tested
BW	Kraniopsis	C. obliqua	4	0.396244	0.193312	10.3333	not tested
BW	Kraniopsis	C. obliqua	5	0.275767	0.17224	6.85962	not tested
BW	Kraniopsis	C. obliqua	6	0.443885	0.162162	12.1034	not tested
BW	Kraniopsis	C. obliqua	7	0.518232	0.147675	12.0458	not tested
BW	Kraniopsis	C. obliqua	8	0.360513	0.147503	9.49909	not tested
BW	Kraniopsis	C. obliqua	9	0.384792	0.189189	9.21255	not tested
BW	Kraniopsis	C. obliqua	10	0.393801	0.143573	9.89351	not tested
BW	Kraniopsis	C. obliqua	11	0.263902	0.172288	5.20122	not tested
BW	Kraniopsis	C. obliqua	12	0.232908	0.226527	5.04094	not tested
BW	Kraniopsis	C. obliqua	13	0.274944	0.175169	8.6347	not tested
BW	Kraniopsis	C. obliqua	14	0.391223	0.156414	11.4767	not tested
BW	Kraniopsis	C. obliqua	15	0.337959	0.151913	9.70278	not tested
BW	Kraniopsis	C. occidentalis	1	0.364244	0.104964	13.623	not tested
BW	Kraniopsis	C. occidentalis	2	0.408459	0.13362	15.351	not tested
BW	Kraniopsis	C. occidentalis	3	0.454959	0.131377	15.1839	not tested
BW	Kraniopsis	C. occidentalis	4	0.308211	0.125	9.97801	not tested
BW	Kraniopsis	C. occidentalis	5	0.393918	0.129669	13.8505	not tested
BW	Kraniopsis	C. occidentalis	6	0.338657	0.109891	10.4407	not tested
BW	Kraniopsis	C. occidentalis	7	0.40085	0.120569	15.4414	not tested
BW	Kraniopsis	C. occidentalis	8	0.369408	0.116699	13.5432	not tested
BW	Kraniopsis	C. occidentalis	9	0.327505	0.143543	12.3655	not tested
BW	Kraniopsis	C. occidentalis	10	0.357655	0.123429	12.9292	not tested
BW	Kraniopsis	C. occidentalis	11	0.395183	0.178858	16.5669	not tested
BW	Kraniopsis	C. occidentalis	12	0.574041	0.191347	20.7246	not tested
BW	Kraniopsis	C. occidentalis	13	0.53139	0.248879	17.8142	not tested
BW	Kraniopsis	C. occidentalis	14	0.525561	0.227354	19.8476	not tested
BW	Kraniopsis	C. occidentalis	15	0.625335	0.249777	21.3785	not tested
BW	Kraniopsis	C. racemosa	1	0.52724	0.311212	11.5152	not tested
BW	Kraniopsis	C. racemosa	2	0.459776	0.297538	11.0833	not tested
BW	Kraniopsis	C. racemosa	3	0.554806	0.28486	13.0201	not tested
BW	Kraniopsis	C. racemosa	4	0.432774	0.194155	12.036	not tested
BW	Kraniopsis	C. racemosa	5	0.300235	0.199415	8.4273	not tested
BW	Kraniopsis	C. racemosa	6	0.459302	0.171528	12.5811	not tested
BW	Kraniopsis	C. racemosa	7	0.399114	0.23252	9.63105	not tested
BW	Kraniopsis	C. racemosa	8	0.413097	0.173647	10.9004	not tested
BW	Kraniopsis	C. racemosa	9	0.93129	0.239076	21.5313	not tested
BW	Kraniopsis	C. racemosa	10	0.308303	0.170762	9.09206	not tested
BW	Kraniopsis	C. racemosa	11	0.406558	0.176218	10.9946	not tested
BW	Kraniopsis	C. racemosa	12	0.426747	0.20116	11.9125	not tested
BW	Kraniopsis	C. racemosa	13	0.494358	0.208686	13.4526	not tested
BW	Kraniopsis	C. racemosa	14	0.572629	0.134729	13.6233	not tested
BW	Kraniopsis	C. racemosa	15	0.665191	0.124104	15.8289	not tested
BW	Kraniopsis	C. sanguinea	1	0.707893	0.244145	16.1139	not tested
BW	Kraniopsis	C. sanguinea	2	0.5672	0.179436	12.6882	not tested
BW	Kraniopsis	C. sanguinea	3	0.625002	0.17263	14.349	not tested
BW	Kraniopsis	C. sanguinea	4	0.640406	0.267786	16.7845	not tested
BW	Kraniopsis	C. sanguinea	5	0.5082	0.235969	13.8032	not tested
BW	Kraniopsis	C. sanguinea	6	0.717088	0.270694	16.4478	not tested
BW	Kraniopsis	C. sanguinea	7	0.573165	0.238696	13.7811	not tested
BW	Kraniopsis	C. sanguinea	8	0.61274	0.203054	13.9652	not tested
BW	Kraniopsis	C. sanguinea	9	0.602568	0.2179	14.2809	not tested
BW	Kraniopsis	C. sanguinea	10	0.637106	0.21826	13.8323	not tested
BW	Kraniopsis	C. sanguinea	11	0.547339	0.195763	13.1422	not tested
BW	Kraniopsis	C. sanguinea	12	0.552634	0.197817	13.3016	not tested
BW	Kraniopsis	C. sanguinea	13	0.666981	0.192933	14.4537	not tested
BW	Kraniopsis	C. sanguinea	14	0.62401	0.241228	15.0519	not tested
BW	Kraniopsis	C. sanguinea	15	0.573118	0.213974	13.2375	not tested
BW	Kraniopsis	C. sericea	1	0.434782	0.113044	15.1744	not tested
BW	Kraniopsis	C. sericea	2	0.480173	0.13749	14.3929	not tested
BW	Kraniopsis	C. sericea	3	0.492074	0.157545	16.606	not tested
BW	Kraniopsis	C. sericea	4	0.323866	0.192872	10.573	not tested
BW	Kraniopsis	C. sericea	5	0.309819	0.205707	11.9935	not tested
BW	Kraniopsis	C. sericea	6	0.394603	0.147436	14.6729	not tested
BW	Kraniopsis	C. sericea	7	0.336317	0.142243	12.4825	not tested
BW	Kraniopsis	C. sericea	8	0.345824	0.17209	14.173	not tested
BW	Kraniopsis	C. sericea	9	0.400753	0.170816	15.1915	not tested
BW	Kraniopsis	C. sericea	10	0.388792	0.116458	14.134	not tested
BW	Kraniopsis	C. sericea	11	0.379923	0.0992306	13.4076	not tested
BW	Kraniopsis	C. sericea	12	0.429502	0.092547	13.4701	not tested
BW	Kraniopsis	C. sericea	13	0.48037	0.152839	16.9233	not tested
BW	Kraniopsis	C. sericea	14	0.764679	0.151585	26.6058	not tested
BW	Kraniopsis	C. sericea	15	0.6218	0.160928	21.5217	not tested
BW	Kraniopsis	C. walteri	1	0.803287	0.293785	18.3503	not tested
BW	Kraniopsis	C. walteri	2	0.721109	0.454545	16.5957	not tested
BW	Kraniopsis	C. walteri	3	0.69697	0.370827	16.7925	not tested
BW	Kraniopsis	C. walteri	4	1.1454	0.301276	23.1998	not tested
BW	Kraniopsis	C. walteri	5	1.09663	0.281677	22.4398	not tested
BW	Kraniopsis	C. walteri	6	0.983509	0.232249	22.0499	not tested
BW	Kraniopsis	C. walteri	7	1.27439	0.306001	24.9172	not tested
BW	Kraniopsis	C. walteri	8	0.61475	0.394869	13.7556	not tested
BW	Kraniopsis	C. walteri	9	0.659643	0.379753	14.9362	not tested
BW	Kraniopsis	C. walteri	10	0.652233	0.311759	14.8152	not tested
BW	Kraniopsis	C. walteri	11	0.589098	0.312872	13.6315	not tested
BW	Kraniopsis	C. walteri	12	0.956482	0.299588	19.7074	not tested
BW	Kraniopsis	C. walteri	13	0.819514	0.278974	15.4999	not tested
BW	Kraniopsis	C. walteri	14	0.997721	0.371923	19.6288	not tested
BW	Kraniopsis	C. walteri	15	0.918919	0.310124	18.7179	not tested
CC	Cornus	C. mas	1	1.12276	0.357544	19.7169	24
CC	Cornus	C. mas	2	1.30656	0.435065	22.4443	31
CC	Cornus	C. mas	3	1.24582	1.21094	21.546	30
CC	Cornus	C. mas	4	1.24105	0.381219	19.99	34
CC	Cornus	C. mas	5	1.18651	0.465474	19.381	26
CC	Cornus	C. mas	6	1.12463	0.42188	19.0952	29
CC	Cornus	C. mas	7	1.20637	0.41243	20.8865	31
CC	Cornus	C. mas	8	1.18091	0.350466	19.7554	31
CC	Cornus	C. mas	9	1.12024	0.4469	19.3459	36
CC	Cornus	C. mas	10	1.0925	0.423728	18.9727	32
CC	Cornus	C. mas	11	1.22164	0.407133	21.1984	38
CC	Cornus	C. mas	12	1.1765	0.430714	21.1129	24
CC	Cornus	C. mas	13	1.19999	0.299915	19.8307	32
CC	Cornus	C. mas	14	1.22505	0.368791	20.6417	32
CC	Cornus	C. mas	15	1.38613	0.299487	22.8274	36
CC	Cornus	C. officinalis	1	1.66631	0	33.3943	26
CC	Cornus	C. officinalis	2	1.7068	0	32.2946	28
CC	Cornus	C. officinalis	3	1.13661	0	29.3462	21
CC	Cornus	C. officinalis	4	1.06599	0	26.4722	17
CC	Cornus	C. officinalis	5	1.0853	0	23.9012	22
CC	Cornus	C. officinalis	6	0.984341	0	24.9863	19
CC	Cornus	C. officinalis	7	1.58428	0	29.4364	20
CC	Cornus	C. officinalis	8	1.56201	0	28.4005	24
CC	Cornus	C. officinalis	9	1.31849	0	26.3701	25
CC	Cornus	C. officinalis	10	1.12069	0	27.7441	17
CC	Cornus	C. officinalis	11	0.969422	0	23.4833	22
CC	Cornus	C. officinalis	12	1.43996	0	28.8171	24
CC	Cornus	C. officinalis	13	0.70986	0	29.4806	21
CC	Cornus	C. officinalis	14	0.558611	0	31.062	22
CC	Cornus	C. officinalis	15	0.553215	0	26.6671	23
BB	Cynoxylon	C. florida	1	0.637434	0.472042	13.2073	not tested
BB	Cynoxylon	C. florida	2	0.985874	0.423779	20.2588	not tested
BB	Cynoxylon	C. florida	3	0.716892	0.360212	14.8918	not tested
BB	Cynoxylon	C. florida	4	0.608593	0.217187	13.1787	not tested
BB	Cynoxylon	C. florida	5	0.552089	0.238964	14.2358	not tested
BB	Cynoxylon	C. florida	6	0.607416	0.254856	13.0204	not tested
BB	Cynoxylon	C. florida	7	0.599765	0.252501	13.8508	not tested
BB	Cynoxylon	C. florida	8	0.625662	0.329017	14.1075	not tested
BB	Cynoxylon	C. florida	9	0.608005	0.276633	14.537	not tested
BB	Cynoxylon	C. florida	10	0.639788	0.145968	12.6853	not tested
BB	Cynoxylon	C. florida	11	0.76751	0.325486	16.4501	not tested
BB	Cynoxylon	C. florida	12	0.763979	0.237787	16.0564	not tested
BB	Cynoxylon	C. florida	13	1.20777	0.359035	22.5618	not tested
BB	Cynoxylon	C. florida	14	1.01001	0.241907	17.7879	not tested
BB	Cynoxylon	C. florida	15	1.3143	0.251324	25.0899	not tested
BB	Syncarpea	C. kousa	1	0.872278	0	19.1845	not tested
BB	Syncarpea	C. kousa	2	0.792231	0	22.9654	not tested
BB	Syncarpea	C. kousa	3	0.678634	0.32784	15.1035	not tested
BB	Syncarpea	C. kousa	4	0.619188	0	14.2162	not tested
BB	Syncarpea	C. kousa	5	0.653914	0	15.3051	not tested
BB	Syncarpea	C. kousa	6	0.499706	0.236021	12.3851	not tested
BB	Syncarpea	C. kousa	7	0.840494	0	17.1367	not tested
BB	Syncarpea	C. kousa	8	0.911713	0.374338	17.2054	not tested
BB	Syncarpea	C. kousa	9	0.625074	0	20.1289	not tested
BB	Syncarpea	C. kousa	10	1.00412	0	19.8142	not tested
BB	Syncarpea	C. kousa	11	0.74279	0	16.6755	not tested
BB	Syncarpea	C. kousa	12	0.944085	0	17.8103	not tested
BB	Syncarpea	C. kousa	13	0.666863	0	14.0745	not tested
BB	Syncarpea	C. kousa	14	0.855798	0	16.7589	not tested
BB	Syncarpea	C. kousa	15	0.661566	0	15.9139	not tested
BB	Cynoxylon	C. nuttallii	1	0.771042	0.381989	19.8485	not tested
BB	Cynoxylon	C. nuttallii	2	0.680989	0.3196	17.702	not tested
BB	Cynoxylon	C. nuttallii	3	0.712184	0.339023	18.1627	not tested
BB	Cynoxylon	C. nuttallii	4	0.570335	0	16.7069	not tested
BB	Cynoxylon	C. nuttallii	5	0.695703	0.292525	15.8085	not tested
BB	Cynoxylon	C. nuttallii	6	0.682166	0.308417	16.3056	not tested
BB	Cynoxylon	C. nuttallii	7	0.749264	0.296645	17.0666	not tested
BB	Cynoxylon	C. nuttallii	8	0.670983	0.299588	15.2508	not tested
BB	Cynoxylon	C. nuttallii	9	0.644497	0.384932	15.5518	not tested
BB	Cynoxylon	C. nuttallii	10	0.667451	0.25721	16.3495	not tested
DW	Arctocrania	C. canadensis	1	0.365374	0.240997	20.9332	not tested
DW	Arctocrania	C. canadensis	2	0.377008	0.159834	18.8374	not tested
DW	Arctocrania	C. canadensis	3	0.291136	0.172022	13.9113	not tested
DW	Arctocrania	C. canadensis	4	0.37036	0.204432	17.7958	not tested
DW	Arctocrania	C. canadensis	5	0.358172	0.186981	16.7596	not tested
DW	Arctocrania	C. canadensis	6	0.287812	0.119945	14.0862	not tested
DW	Arctocrania	C. canadensis	7	0.227848	0.108145	12.1053	not tested
DW	Arctocrania	C. canadensis	8	0.361585	0.12328	17.2012	not tested
DW	Arctocrania	C. canadensis	9	0.203908	0.190424	11.2785	not tested
DW	Arctocrania	C. canadensis	10	0.275454	0.134287	13.29	not tested
DW	Arctocrania	C. canadensis	11	0.24626	0.0922438	14.8315	not tested
DW	Arctocrania	C. canadensis	12	0.139889	0.0925208	9.80202	not tested
DW	Arctocrania	C. suecica	1	0.266747	0.114205	9.61035	not tested
DW	Arctocrania	C. suecica	2	0.271695	0.131792	9.29523	not tested
DW	Arctocrania	C. suecica	3	0.259887	0.0916061	9.23695	not tested
DW	Arctocrania	C. suecica	4	0.25343	0.0940274	8.16539	not tested
DW	Arctocrania	C. suecica	5	0.305892	0.0952381	10.5132	not tested
DW	Arctocrania	C. suecica	6	0.240876	0.0815085	8.45672	not tested
DW	Arctocrania	C. suecica	7	0.245763	0.101291	9.22727	not tested
DW	Arctocrania	C. suecica	8	0.2159	0.0875706	7.05432	not tested
DW	Arctocrania	C. suecica	9	0.267151	0.0964487	9.01048	not tested
DW	Arctocrania	C. suecica	10	0.2159	0.0831316	7.15336	not tested
